# Supplementary material for: Tandem 1,5-migration/Michael reactions to prepare adducts of pyrazolone derivatives: protecting group-directed rearrangement
Source: Royal Society of Chemistry journal article supplement (doi:10.1039/c2ra21549g), 2012-01-01

# **Tandem 1,5-migration/Michael reactions to prepare adducts of pyrazolone derivatives: protecting group-directed rearrangement**

Zhijin Lu, Chen Xie, Jianlin Han,\* and Yi Pan \*

## Table of Contents:

|                                                                              |            |
|------------------------------------------------------------------------------|------------|
| <b>1 General information</b> .....                                           | <b>S2</b>  |
| <b>2 General procedures for the synthesis of pyrazole</b> .....              | <b>S2</b>  |
| <b>3 General Procedure for the addition of 1 and 2 to nitroolefins</b> ..... | <b>S5</b>  |
| <b>4 General procedure for the addition of 3 to nitroolefins</b> .....       | <b>S19</b> |
| <b>5 X-ray analysis</b> .....                                                | <b>S23</b> |
| <b>6 NMR Spectra of 1–3 and 5–7</b> .....                                    | <b>S26</b> |

## 1 General information

NMR spectra were obtained on Bruker 300 or 400 MHz spectrometer in DMSO- $d_6$  or  $CDCl_3$ , and chemical shifts are reported in ppm using TMS as internal standard. IR and ESI-MS spectra were measured on Bruker Vector 22 as KBr pellets and Finnigan Mat TSQ 7000 instruments respectively. Microanalyses were obtained on Perkin-Elmer 240 instruments, and melting points (mp) were determined with a digital electrothermal apparatus without further correction.

## 2 General procedures for the synthesis of pyrazole

A vial charged with 3-methyl-1-phenyl-1H-pyrazol-5(4H)-one (10 mmol), acyl chloride (10 mmol) and DCM (25 mL) was stirred and cooled to  $-40\text{ }^\circ\text{C}$ , The mixture was warmed to room temperature and continue to react for another 8 hours. The reaction mixture was filtered and evaporated to dryness. The residue was purified through chromatography on a silica gel column eluted with dichloromethane and methanol to give the corresponding products.

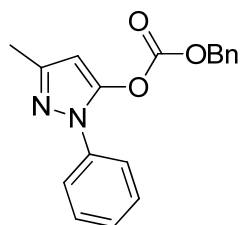

### Benzyl (3-methyl-1-phenyl-1H-pyrazol-5-yl) carbonate (1a)

Yellow oil.  $^1\text{H}$  NMR (300MHz,  $CDCl_3$ ):  $\delta$  2.36 (s, 3H), 5.24 (s, 2H), 6.16 (s, 1H), 7.28-7.45 (m, 8H), 7.58-7.60 (m, 2H).  $^{13}\text{C}$  NMR (75MHz,  $CDCl_3$ ):  $\delta$  14.6, 71.3, 95.5, 122.9, 127.2, 128.7, 128.8, 129.1, 129.2, 134.1, 137.9, 144.6, 148.9, 151.0. IR (KBr):  $\nu$  = 3066, 3035, 1781, 1597, 1564, 1506, 1456, 1442, 1386, 1369, 1225, 1179, 1158, 1013, 905, 756, 695  $\text{cm}^{-1}$ . HRMS  $[\text{M}+\text{Na}^+]$ : calcd for  $\text{C}_{18}\text{H}_{16}\text{N}_2\text{O}_3\text{Na}$ : 331.1053, found: 331.1053.

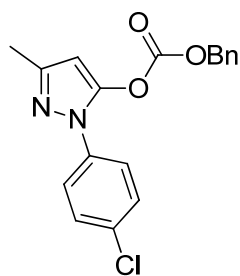

**Benzyl (1-(4-chlorophenyl)-3-methyl-1H-pyrazol-5-yl) carbonate (1b)**

Yellow solid. M.p. 62-64 °C.  $^1\text{H}$  NMR (300MHz,  $\text{CDCl}_3$ ):  $\delta$  2.34 (s, 3H), 5.25 (s, 2H), 6.15 (s, 1H), 7.35-7.42 (m, 7H), 7.50-7.53 (m, 2H).  $^{13}\text{C}$  NMR (75MHz,  $\text{CDCl}_3$ ):  $\delta$  14.5, 71.4, 95.6, 123.9, 128.7, 128.8, 129.2, 129.3, 132.7, 133.9, 136.4, 144.7, 149.2, 150.8. IR (KBr):  $\nu$  = 3177, 1768, 1594, 1586, 1563, 1505, 1462, 1456, 1440, 1411, 1386, 1367, 1267, 1244, 1227, 1181, 1154, 1118, 1096, 1013, 955, 916, 835, 812, 779, 745, 699, 653, 503  $\text{cm}^{-1}$ . HRMS  $[\text{M}+\text{Na}^+]$ : calcd for  $\text{C}_{18}\text{H}_{16}\text{N}_2\text{O}_3\text{Na}$ : 365.0663, found: 365.0659.

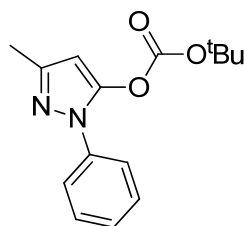

**Tert-butyl (3-methyl-1-phenyl-1H-pyrazol-5-yl) carbonate (2a)**

Yellow oil.  $^1\text{H}$  NMR (300MHz,  $\text{CDCl}_3$ ):  $\delta$  1.46 (s, 9H), 2.33 (s, 3H), 6.07 (s, 1H), 7.29-7.34 (m, 1H), 7.42-7.47 (m, 2H), 7.57-7.60 (m, 2H).  $^{13}\text{C}$  NMR (75MHz,  $\text{CDCl}_3$ ):  $\delta$  14.5, 27.4, 85.2, 95.5, 122.9, 127.0, 129.1, 138.1, 144.9, 148.8, 148.9. IR (KBr):  $\nu$  = 2983, 2933, 1778, 1598, 1568, 1507, 1477, 1456, 1439, 1389, 1372, 1274, 1248, 1139, 1052, 1026, 878, 814, 775, 763, 694, 625  $\text{cm}^{-1}$ . HRMS  $[\text{M}+\text{Na}^+]$ : calcd for  $\text{C}_{15}\text{H}_{18}\text{N}_2\text{O}_3\text{Na}$ : 297.1210, found: 297.1207.

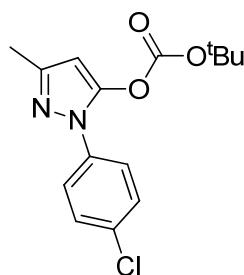

### **Tert-butyl (1-(4-chlorophenyl)-3-methyl-1H-pyrazol-5-yl) carbonates (2b)**

Yellow oil.  $^1\text{H}$  NMR (300MHz,  $\text{CDCl}_3$ ):  $\delta$  1.49 (s, 9H), 2.31 (s, 3H), 6.08 (s, 1H), 7.40-7.43 (m, 2H), 7.53-7.56 (m, 2H).  $^{13}\text{C}$  NMR (75MHz,  $\text{CDCl}_3$ ):  $\delta$  14.5, 27.4, 85.5, 95.7, 123.9, 129.2, 132.5, 136.6, 145.0, 148.7, 149.2. IR (KBr):  $\nu$  = 2981, 1789, 1780, 1597, 1587, 1568, 1505, 1477, 1408, 1396, 1371, 1273, 1241, 1166, 1102, 1092, 1050, 1012, 991, 879, 836, 811, 784, 774, 622  $\text{cm}^{-1}$ . HRMS  $[\text{M}+\text{Na}^+]$ : calcd for  $\text{C}_{15}\text{H}_{17}\text{N}_2\text{O}_3\text{ClNa}$ : 331.0820, found: 331.0821.

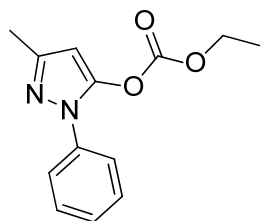

### **Ethyl (3-methyl-1-phenyl-1H-pyrazol-5-yl) carbonates (2c)**

Yellow oil.  $^1\text{H}$  NMR (400MHz,  $\text{CDCl}_3$ ):  $\delta$  1.32 (t,  $J=7.0\text{Hz}$ , 3H), 2.34 (s, 3H), 4.29 (q,  $J=7.0\text{Hz}$ , 2H), 6.12 (s, 1H), 7.30-7.34 (m, 1H), 7.43-7.47 (m, 2H), 7.57-7.60 (m, 2H).  $^{13}\text{C}$  NMR (100MHz,  $\text{CDCl}_3$ ):  $\delta$  14.0, 14.5, 65.9, 95.3, 122.9, 127.1, 129.1, 137.9, 144.7, 148.9, 150.8. IR (KBr):  $\nu$  = 3065, 2984, 2931, 1781, 1598, 1563, 1507, 1443, 1389, 1369, 1301, 1235, 1174, 1160, 1097, 1034, 1019, 983, 970, 892, 761, 693  $\text{cm}^{-1}$ . HRMS  $[\text{M}+\text{Na}^+]$ : calcd for  $\text{C}_{13}\text{H}_{14}\text{N}_2\text{O}_3\text{Na}$ : 269.0897, found: 269.0898.

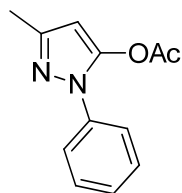

### **3-methyl-1-phenyl-1H-pyrazol-5-yl acetate (3a)**

Yellow oil.  $^1\text{H}$  NMR (300MHz,  $\text{CDCl}_3$ ):  $\delta$  2.26 (s, 3H), 2.34 (s, 3H), 6.10 (s, 1H), 7.31-7.35 (m, 1H), 7.43-7.48 (m, 2H), 7.54-7.56 (m, 2H).  $^{13}\text{C}$  NMR (75MHz,  $\text{CDCl}_3$ ):  $\delta$  14.5, 20.7, 95.9, 123.0, 127.1, 129.1, 138.1, 144.3, 148.9, 166.1. IR (KBr):  $\nu$  = 3066, 2928, 1790, 1596, 1561, 1505, 1439, 1387, 1369, 1186, 1144, 1044, 1024, 1008, 882, 807, 760, 694, 671  $\text{cm}^{-1}$ . HRMS  $[\text{M}+\text{Na}^+]$ : calcd for  $\text{C}_{12}\text{H}_{12}\text{N}_2\text{O}_2\text{Na}$ : 239.0791, found: 239.0793.

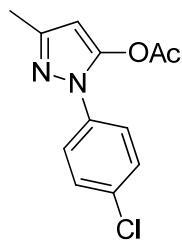

### 1-(4-chlorophenyl)-3-methyl-1H-pyrazol-5-yl acetate (3b)

Yellow oil.  $^1\text{H}$  NMR (400MHz,  $\text{CDCl}_3$ ):  $\delta$  2.28 (s, 3H), 2.33 (s, 3H), 6.11 (s, 1H), 7.40-7.44 (m, 2H), 7.50-7.53 (m, 2H).  $^{13}\text{C}$  NMR (100MHz,  $\text{CDCl}_3$ ):  $\delta$  14.5, 20.8, 96.1, 124.1, 129.2, 132.7, 136.6, 144.4, 149.3, 165.9. IR (KBr):  $\nu$  = 2928, 1793, 1597, 1586, 1560, 1501, 1473, 1441, 1408, 1387, 1369, 1185, 1143, 1094, 1038, 1014, 974, 881, 832, 808, 780, 686, 515  $\text{cm}^{-1}$ . HRMS [ $\text{M}+\text{Na}^+$ ]: calcd for  $\text{C}_{12}\text{H}_{11}\text{N}_2\text{O}_2\text{ClNa}$ : 273.0401, found: 273.0410.

### 3 General Procedure for the addition of 1 and 2 to nitroolefins

A vial charged with benzyl (3-methyl-1-phenyl-1H-pyrazol-5-yl) carbonate (**1a**) (0.5 mmol), DMAP (0.005 mmol) and  $\text{CH}_2\text{Cl}_2$  (2 mL) was stirred at room temperature, and then nitroolefins **4** (0.75 mmol) was added. The stirring was maintained for the indicated time. The reaction mixture was directly charged onto silica gel column eluted with hexane/ethyl acetate dichloromethane and methanol to give the corresponding products **5** or **6**.

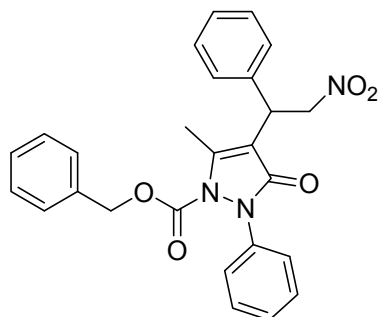

### Benzyl-5-methyl-4-(2-nitro-1-phenylethyl)-3-oxo-2-phenyl-2,3-dihydropyrazole-1-carboxylate(5a)

Yellow oil, yield: 98 %.  $^1\text{H}$  NMR (300MHz,  $\text{CDCl}_3$ ):  $\delta$  2.60 (s, 3H), 4.59-4.70 (m, 1H), 4.98-5.03 (m, 1H), 5.08-5.08 (m, 2H), 5.48-5.56 (m, 1H), 6.91-7.52 (m, 15H).

$^{13}\text{C}$  NMR (75MHz,  $\text{CDCl}_3$ ):  $\delta$  13.4, 40.1, 69.9, 76.2, 111.3, 122.7, 123.4, 127.0, 127.4, 127.9, 128.0, 128.4, 128.6, 128.8, 129.0, 129.3, 129.3, 133.5, 138.2, 138.3, 149.4, 151.4, 165.8. IR (KBr)  $\nu$  3459, 3064, 3032, 2921, 1876, 1279, 698  $\text{cm}^{-1}$ . HRMS  $[\text{M}+\text{Na}^+]$ : calcd for  $\text{C}_{26}\text{H}_{23}\text{N}_3\text{O}_5$ , 480.1530, found: 480.1533.

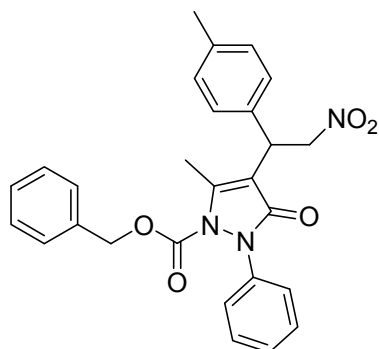

**Benzyl-5-methyl-4-(2-nitro-1-p-tolyylethyl)-3-oxo-2-phenyl-2,3-dihydropyrazole-1-carboxylate(5b)**

Yellow oil, yield: 92%.  $^1\text{H}$  NMR (300MHz,  $\text{CDCl}_3$ ):  $\delta$  2.33 (s, 3H), 2.59 (s, 3H), 4.54-4.59 (m, 1H), 4.81-5.03 (m, 1H), 5.07-5.09 (m, 1H), 5.46-5.53 (m, 1H), 6.88-7.39 (m, 14H).  $^{13}\text{C}$  NMR (75MHz,  $\text{CDCl}_3$ ):  $\delta$  13.4, 21.1, 39.8, 69.9, 76.3, 111.6, 122.7, 123.3, 126.9, 127.2, 127.7, 128.4, 128.5, 128.8, 129.0, 129.3, 129.7, 129.9, 133.5, 135.2, 137.8, 138.3, 149.5, 151.2, 165.8. IR (KBr)  $\nu$  3064, 3033, 2955, 2933, 2860, 1278, 696  $\text{cm}^{-1}$ . HRMS  $[\text{M}+\text{Na}^+]$ : calcd for  $\text{C}_{27}\text{H}_{25}\text{N}_3\text{O}_5$ , 494.1686, found: 494.1689.

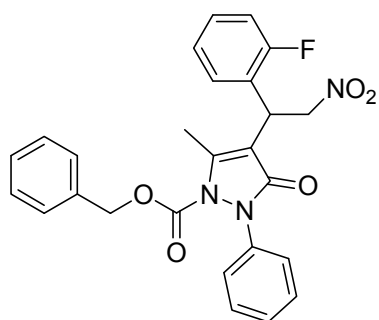

**Benzyl**

**4-(1-(2-fluorophenyl)-2-nitroethyl)-5-methyl-3-oxo-2-phenyl-2,3-dihydropyrazole-1-carboxylate(5c)**

Yellow oil, yield: 92%,  $^1\text{H}$  NMR (300MHz,  $\text{CDCl}_3$ ):  $\delta$  2.65 (s, 3H), 4.96-5.06 (m, 2H), 5.09 (s, 2H), 5.48-5.55 (m, 1H), 6.89-7.72 (m, 14H).  $^{13}\text{C}$  NMR (75MHz,  $\text{CDCl}_3$ ):  $\delta$

13.4, 13.4, 31.4, 31.4, 70.0, 74.8, 110.0, 115.4, 115.7, 122.7, 123.3, 124.6, 124.8, 124.9, 124.9, 127.0, 128.5, 128.6, 128.8, 129.0, 129.3, 129.4, 129.5, 129.6, 133.5, 138.2, 149.4, 151.8, 158.2, 161.4, 165.7. IR (KBr)  $\nu$  3066, 3036, 2962, 2921, 1750, 1683, 695  $\text{cm}^{-1}$ . HRMS  $[\text{M}+\text{Na}^+]$ : calcd for  $\text{C}_{26}\text{H}_{22}\text{N}_3\text{O}_5\text{F}$ , 498.1436, found: 498.1436.

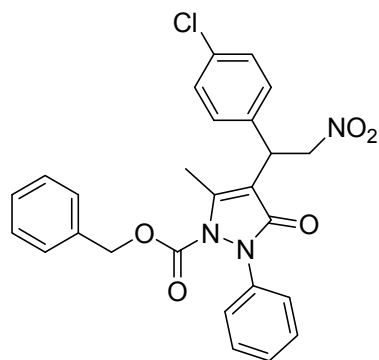

### Benzyl

#### 4-(1-(4-chlorophenyl)-2-nitroethyl)-5-methyl-3-oxo-2-phenyl-2,3-dihydropyrazole-1-carboxylate(5d)

Yellow oil, yield: 95%,  $^1\text{H}$  NMR (300MHz,  $\text{CDCl}_3$ ):  $\delta$  2.59 (s, 3H), 4.55-4.60 (m, 1H), 4.98-5.08 (m, 1H), 5.08 (s, 2H), 5.39-5.46 (m, 1H), 6.89-7.72 (m, 14H).  $^{13}\text{C}$  NMR (75MHz,  $\text{CDCl}_3$ ):  $\delta$  13.4, 39.4, 70.0, 74.8, 110.9, 122.7, 127.1, 128.4, 128.6, 128.8, 129.0, 129.3, 129.3, 133.4, 133.9, 138.1, 138.7, 149.3, 151.3, 165.7. IR (KBr)  $\nu$  3066, 3035, 2961, 1750, 1683, 696  $\text{cm}^{-1}$ . HRMS  $[\text{M}+\text{Na}^+]$ : calcd for  $\text{C}_{26}\text{H}_{22}\text{N}_3\text{O}_5\text{Cl}$ , 514.1140, found: 514.1142.

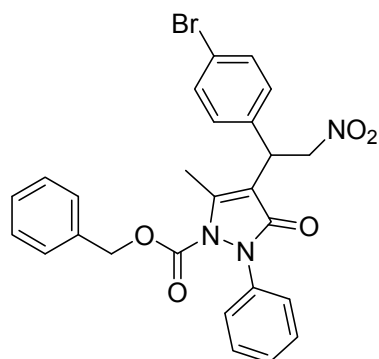

### Benzyl

#### 4-(1-(4-bromophenyl)-2-nitroethyl)-5-methyl-3-oxo-2-phenyl-2,3-dihydropyrazole-1-carboxylate(5e)

Yellow oil, yield: 95%,  $^1\text{H}$  NMR (300MHz,  $\text{CDCl}_3$ ):  $\delta$  2.59 (s, 3H), 4.55-4.60 (m, 1H), 4.98-5.08 (m, 1H), 5.08 (s, 2H), 5.39-5.46 (m, 1H), 6.88-7.46 (m, 14H).  $^{13}\text{C}$  NMR (75MHz,  $\text{CDCl}_3$ ):  $\delta$  13.3, 39.5, 70.0, 71.9, 76.0, 110.8, 122.1, 122.7, 123.3, 127.1, 128.4, 128.6, 128.6, 128.8, 128.8, 129.1, 129.1, 129.3, 129.6, 132.3, 133.4, 137.2, 138.1, 149.3, 151.3, 165.6. IR (KBr)  $\nu$  3065, 3034, 2961, 1750, 1683, 695  $\text{cm}^{-1}$ . HRMS  $[\text{M}+\text{Na}^+]$ : calcd for  $\text{C}_{26}\text{H}_{22}\text{N}_3\text{O}_5\text{Br}$ , 558.0635, found: 558.0624.

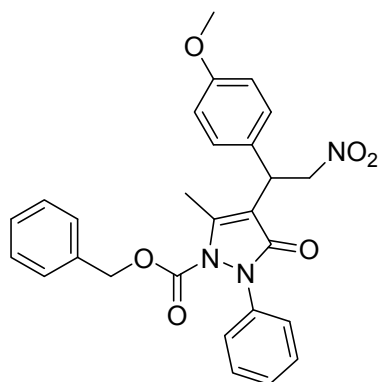

### **Benzyl**

#### **4-(1-(4-methoxyphenyl)-2-nitroethyl)-5-methyl-3-oxo-2-phenyl-2,3-dihydropyrazole-1-carboxylate(5f)**

Yellow oil, yield: 85%.  $^1\text{H}$  NMR (300MHz,  $\text{CDCl}_3$ ):  $\delta$  2.58 (s, 3H), 3.79 (s, 3H), 4.53-4.70 (m, 1H), 4.95-5.02 (m, 1H), 5.07-5.07 (m, 2H), 5.31-5.50 (m, 1H), 6.85-7.43 (m, 14H).  $^{13}\text{C}$  NMR (75MHz,  $\text{CDCl}_3$ ):  $\delta$  13.4, 39.4, 55.2, 69.9, 76.4, 111.6, 122.7, 114.3, 114.5, 127.0, 128.4, 128.5, 128.8, 129.0, 129.0, 129.3, 130.2, 133.5, 138.3, 149.5, 151.1, 159.2, 165.8. IR (KBr)  $\nu$  3065, 3034, 2957, 2934, 1683, 695  $\text{cm}^{-1}$ . HRMS  $[\text{M}+\text{Na}^+]$ : calcd for  $\text{C}_{27}\text{H}_{25}\text{N}_3\text{O}_6$ , 510.1636, found: 510.1642.



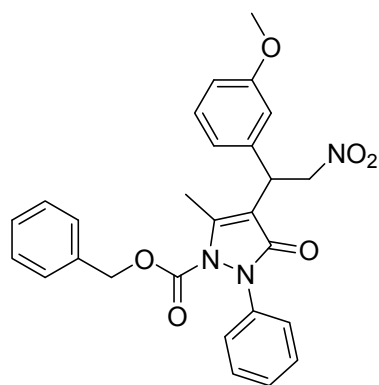

### Benzyl

#### 4-(1-(3-methoxyphenyl)-2-nitroethyl)-5-methyl-3-oxo-2-phenyl-2,3-dihydropyrazole-1-carboxylate(5g)

Yellow oil, yield: 95%,  $^1\text{H}$  NMR (300MHz,  $\text{CDCl}_3$ ):  $\delta$  2.59 (s, 3H), 3.79 (s, 3H), 4.55-4.60 (m, 1H), 4.98-5.05 (m, 1H), 5.07-5.09 (m, 2H), 5.48-5.54 (m, 1H), 6.82-7.46 (m, 14H).  $^{13}\text{C}$  NMR (75MHz,  $\text{CDCl}_3$ ):  $\delta$  13.5, 40.1, 55.3, 69.9, 76.1, 111.3, 113.2, 113.7, 120.0, 122.7, 123.3, 127.0, 127.6, 128.4, 128.5, 129.0, 129.3, 130.3, 133.5, 138.3, 139.7, 149.4, 151.4, 160.1, 165.8. IR (KBr)  $\nu$  3065, 3034, 2960, 2939, 1683, 699  $\text{cm}^{-1}$ . HRMS  $[\text{M}+\text{Na}^+]$ : calcd for  $\text{C}_{27}\text{H}_{25}\text{N}_3\text{O}_6$ , 510.1636, found: 510.1637.

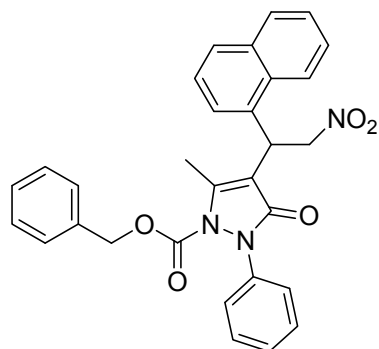

### Benzyl

#### 5-methyl-4-(1-(naphthalen-1-yl)-2-nitroethyl)-3-oxo-2-phenyl-2,3-dihydropyrazole-1-carboxylate(5h)

Yellow oil, yield: 85%,  $^1\text{H}$  NMR (300MHz,  $\text{CDCl}_3$ ):  $\delta$  2.55 (s, 3H), 4.88-5.00 (m, 1H), 4.98-5.05 (m, 1H), 5.07 (s, 2H), 5.48-5.54 (m, 1H), 6.82-7.46 (m, 17H).  $^{13}\text{C}$  NMR (75MHz,  $\text{CDCl}_3$ ):  $\delta$  13.8, 35.1, 69.9, 75.6, 110.9, 121.9, 122.8, 123.5, 125.8, 126.0, 126.5, 127.0, 127.1, 127.2, 128.4, 128.5, 128.7, 128.7, 128.8, 129.1, 129.6, 130.5,

133.2, 133.5, 134.1, 138.9, 149.4, 152.0, 166.4. IR (KBr)  $\nu$  3063, 3037, 2961, 2921, 1683, 696  $\text{cm}^{-1}$  HRMS  $[\text{M}+\text{Na}^+]$ : calcd for  $\text{C}_{30}\text{H}_{25}\text{N}_3\text{O}_5$ , 530.1686, found: 510.1683.

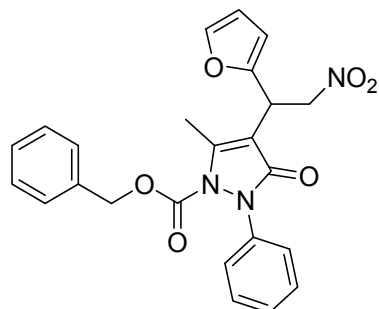

### Benzyl

#### 4-(1-(furan-2-yl)-2-nitroethyl)-5-methyl-3-oxo-2-phenyl-2,3-dihydropyrazole-1-carboxylate(5i)

Yellow oil, yield: 83 %,  $^1\text{H}$  NMR (300MHz,  $\text{CDCl}_3$ ):  $\delta$  2.60 (s, 3H), 4.80-4.83 (m, 1H), 4.99-5.06 (m, 1H), 5.10-5.12 (m, 2H), 5.26-5.34 (m, 1H), 6.26-7.38 (m, 13H).  $^{13}\text{C}$  NMR (75 MHz,  $\text{CDCl}_3$ ):  $\delta$  13.4, 33.4, 70.0, 76.6, 107.5, 108.9, 110.8, 126.9, 128.4, 128.6, 128.8, 129.0, 133.4, 138.2, 142.2, 149.4, 149.8, 152.0, 165.2. IR (KBr)  $\nu$  3147, 3177, 3065, 3035, 1693, 696  $\text{cm}^{-1}$ . HRMS  $[\text{M}+\text{Na}^+]$ : calcd for  $\text{C}_{24}\text{H}_{21}\text{N}_3\text{O}_6$ , 470.1323, found: 470.1322.

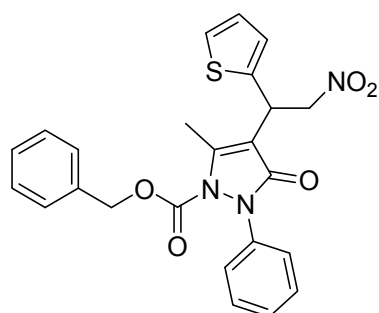

### Benzyl

#### 5-methyl-4-(2-nitro-1-(thiophen-2-yl)ethyl)-3-oxo-2-phenyl-2,3-dihydropyrazole-1-carboxylate(5j)

Yellow oil, yield: 76 %,  $^1\text{H}$  NMR (300MHz,  $\text{CDCl}_3$ ):  $\delta$  2.61 (s, 3H), 4.89-5.03 (m, 2H), 5.09-5.11 (m, 2H), 5.43-5.50 (m, 1H), 6.89-7.41 (m, 13H).  $^{13}\text{C}$  NMR (75 MHz,  $\text{CDCl}_3$ ):  $\delta$  13.4, 34.8, 70.0, 76.2, 110.9, 122.7, 123.3, 125.1, 126.0, 127.0, 127.4, 128.4, 128.6, 128.8, 129.0, 133.4, 138.2, 139.6, 149.4, 151.3, 165.3. IR (KBr)  $\nu$

3090, 3067, 3035, 2959, 1683, 698  $\text{cm}^{-1}$ . HRMS  $[\text{M}+\text{Na}^+]$ : calcd for  $\text{C}_{24}\text{H}_{21}\text{N}_3\text{O}_5\text{S}$ , 486.1094, found: 486.1096.

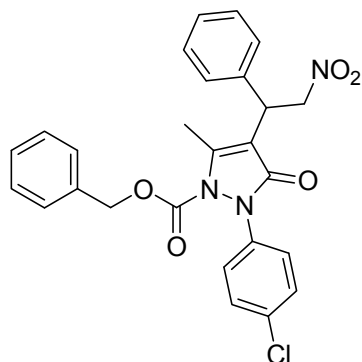

**Benzyl**

**2-(4-chlorophenyl)-5-methyl-4-(2-nitro-1-phenylethyl)-3-oxo-2,3-dihydropyrazole-1-carboxylate(5k)**

Yellow oil, yield: 92%,  $^1\text{H}$  NMR (300MHz,  $\text{CDCl}_3$ ):  $\delta$  2.60 (s, 3H), 4.58-4.69 (m, 1H), 4.94-5.00 (m, 1H), 5.09-5.14 (m, 2H), 5.48-5.56 (m, 1H), 6.94-7.49 (m, 14H).  $^{13}\text{C}$  NMR (75MHz,  $\text{CDCl}_3$ ):  $\delta$  13.5, 40.1, 65.3, 76.1, 111.4, 124.6, 127.0, 127.8, 128.1, 128.6, 129.0, 129.1, 129.3, 129.3, 132.6, 133.3, 136.7, 138.0, 149.3, 151.8, 165.7. IR (KBr)  $\nu$  3090, 3064, 2961, 1751, 699  $\text{cm}^{-1}$ . HRMS  $[\text{M}+\text{Na}^+]$ : calcd for  $\text{C}_{26}\text{H}_{22}\text{N}_3\text{O}_5\text{Cl}$ , 514.1140, found: 514.1129.

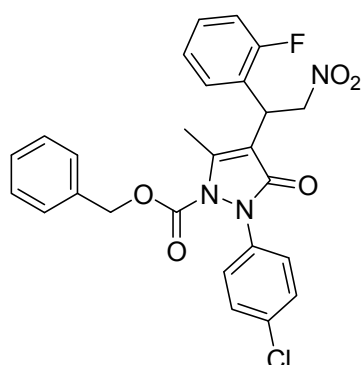

**Benzyl**

**2-(4-chlorophenyl)-4-(1-(2-fluorophenyl)-2-nitroethyl)-5-methyl-3-oxo-2,3-dihydropyrazole-1-carboxylate(5l)**

Yellow oil, yield: 93%,  $^1\text{H}$  NMR (300MHz,  $\text{CDCl}_3$ ):  $\delta$  2.64 (s, 3H), 4.91-5.06 (m, 2H), 5.10-5.10 (m, 2H), 5.17-5.22 (m, 1H), 5.48-5.55 (m, 1H), 6.94-7.65 (m, 13H).  $^{13}\text{C}$

NMR (75MHz, CDCl<sub>3</sub>): δ 13.4, 13.4, 31.4, 31.4, 70.1, 74.7, 110.0, 115.5, 115.8, 124.5, 124.9, 124.9, 127.0, 128.6, 128.6, 128.7, 129.0, 129.1, 129.2, 129.3, 129.5, 129.8, 132.6, 133.3, 136.6, 149.2, 152.2, 161.4, 165.5. IR (KBr)  $\nu$  3091, 3066, 2958, 1750, 698 cm<sup>-1</sup>. HRMS [M+Na<sup>+</sup>]: calcd for C<sub>26</sub>H<sub>21</sub>N<sub>3</sub>O<sub>5</sub>ClF, 532.1046, found: 532.1046.

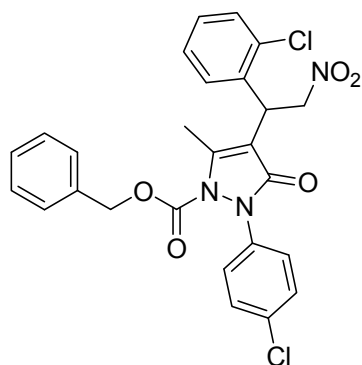

### Benzyl

#### 2-(4-chlorophenyl)-4-(1-(2-chlorophenyl)-2-nitroethyl)-5-methyl-3-oxo-2,3-dihydropyrazole-1-carboxylate(5m)

Yellow oil, yield: 92%, <sup>1</sup>H NMR (300MHz, CDCl<sub>3</sub>): δ 2.66 (s, 3H), 4.80-4.86 (m, 1H), 5.10-5.10 (m, 2H), 5.17-5.22 (m, 1H), 5.49-5.57 (m, 1H), 6.93-7.40 (m, 13H). <sup>13</sup>C NMR (75MHz, CDCl<sub>3</sub>): δ 14.0, 35.7, 70.1, 74.9, 110.9, 124.6, 127.0, 127.7, 128.6, 128.7, 129.0, 129.1, 129.3, 129.4, 129.9, 129.9, 132.7, 133.0, 133.3, 134.9, 136.6, 149.2, 152.7, 165.7. IR (KBr)  $\nu$  3092, 3064, 2956, 1750, 698 cm<sup>-1</sup>. HRMS [M+Na<sup>+</sup>]: calcd for C<sub>26</sub>H<sub>21</sub>N<sub>3</sub>O<sub>5</sub>Cl<sub>2</sub>, 548.0750, found: 548.0742.

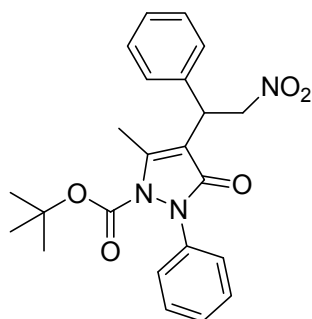

#### Tert-butyl-5-methyl-4-(2-nitro-1-phenylethyl)-3-oxo-2-phenyl-2,3-dihydropyrazole-1-carboxylate(6a)

Yellow oil, yield: 90%. <sup>1</sup>H NMR (300MHz, CDCl<sub>3</sub>): 1.21-1.28 (m, 9H), 2.59 (s, 3H),

4.58-4.63 (m, 1H), 5.00-5.06 (m, 1H), 5.50-5.57 (m, 1H), 7.30-7.54 (m, 10H).  $^{13}\text{C}$  NMR (75MHz,  $\text{CDCl}_3$ ):  $\delta$  13.5, 27.5, 40.1, 76.2, 86.4, 110.6, 124.5, 127.9, 128.0, 129.0, 129.3, 132.3, 137.0, 138.3, 147.5, 151.6, 165.2. IR (KBr)  $\nu$  3071, 2980, 2933, 1749, 699  $\text{cm}^{-1}$ . HRMS  $[\text{M}+\text{Na}^+]$ : calcd for  $\text{C}_{23}\text{H}_{25}\text{N}_3\text{O}_5$ , 446.1486, found: 446.1687.

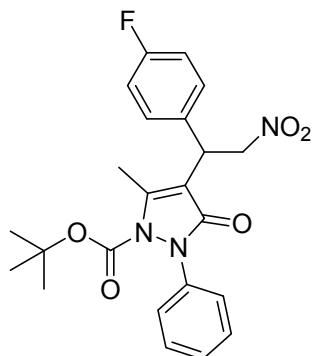

**Tert-butyl**

**4-(1-(4-fluorophenyl)-2-nitroethyl)-5-methyl-3-oxo-2-phenyl-2,3-dihydropyrazole-1-carboxylate(6b)**

Yellow oil, yield: 92 %.  $^1\text{H}$  NMR (300MHz,  $\text{CDCl}_3$ ):  $\delta$  1.21-1.29 (m, 9H), 2.58 (s, 3H), 4.56-4.61 (m, 1H), 5.00-5.07 (m, 1H), 5.41-5.48 (m, 1H), 7.15-7.45 (m, 9H).  $^{13}\text{C}$  NMR (75MHz,  $\text{CDCl}_3$ ):  $\delta$  13.2, 27.4, 39.4, 76.4, 86.1, 110.3, 115.9, 116.3, 123.4, 126.9, 129.6, 129.7, 134.2, 134.3, 138.3, 147.5, 150.9, 160.6, 163.9, 165.1. IR (KBr)  $\nu$  3071, 2980, 2933, 1749, 699  $\text{cm}^{-1}$ . HRMS  $[\text{M}+\text{Na}^+]$ : calcd for  $\text{C}_{23}\text{H}_{24}\text{N}_3\text{O}_5\text{F}$ , 464.1592, found: 464.1597.

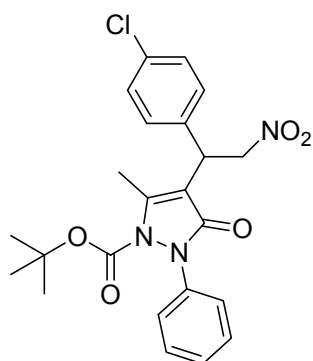

**Tert-butyl**

**4-(1-(4-chlorophenyl)-2-nitroethyl)-5-methyl-3-oxo-2-phenyl-2,3-dihydropyrazole-1-carboxylate(6c)**

Yellow oil, yield: 94%.  $^1\text{H}$  NMR (300MHz,  $\text{CDCl}_3$ ):  $\delta$  1.21-1.28 (m, 9H), 2.58 (s, 3H),

4.55-4.60 (m, 1H), 5.01-5.07 (m, 1H), 5.40-5.48 (m, 1H), 7.27-7.49 (m, 8H).  $^{13}\text{C}$  NMR (75MHz,  $\text{CDCl}_3$ ):  $\delta$  13.3, 27.4, 29.7, 39.5, 76.2, 86.2, 110.0, 123.4, 126.9, 128.8, 129.3, 133.9, 137.0, 138.3, 147.5, 151.0, 165.1. IR (KBr)  $\nu$  3071, 2980, 2933, 1749, 699  $\text{cm}^{-1}$ . HRMS  $[\text{M}+\text{Na}^+]$ : calcd for  $\text{C}_{23}\text{H}_{24}\text{N}_3\text{O}_5\text{Cl}$ , 480.1297, found: 480.1305.

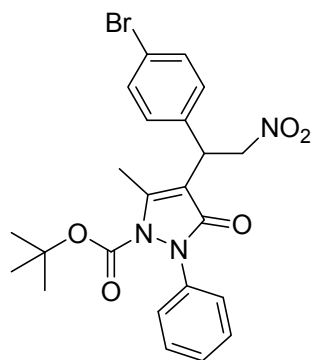

**Tert-butyl**

**4-(1-(4-bromophenyl)-2-nitroethyl)-5-methyl-3-oxo-2-phenyl-2,3-dihydropyrazole-1-carboxylate(6d)**

Yellow oil, yield: 98%,  $^1\text{H}$  NMR (300MHz,  $\text{CDCl}_3$ ):  $\delta$  1.21-1.29 (m, 9H), 2.58 (s, 3H), 4.53-4.59 (m, 1H), 5.01-5.07 (m, 1H), 5.40-5.48 (m, 1H), 7.17-7.51 (m, 9H).  $^{13}\text{C}$  NMR (75MHz,  $\text{CDCl}_3$ ):  $\delta$  13.3, 27.1, 27.4, 29.7, 39.6, 76.1, 86.2, 109.9, 122.0, 122.8, 123.4, 126.9, 128.8, 129.2, 129.3, 129.6, 132.3, 137.5, 138.2, 147.5, 151.0, 165.1. IR (KBr)  $\nu$  3071, 2980, 2933, 1749, 699  $\text{cm}^{-1}$ . HRMS  $[\text{M}+\text{Na}^+]$ : calcd for  $\text{C}_{24}\text{H}_{27}\text{N}_3\text{O}_6$ , 476.1792, found: 476.1789.

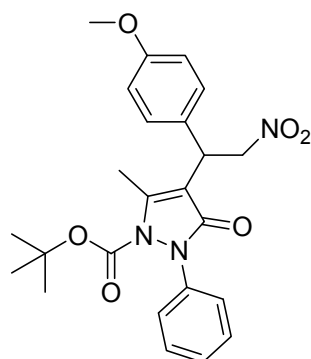

**Tert-butyl**

**4-(1-(4-methoxyphenyl)-2-nitroethyl)-5-methyl-3-oxo-2-phenyl-2,3-dihydropyrazole-1-carboxylate(6e)**

Yellow oil, yield: 98%,  $^1\text{H}$  NMR (300MHz,  $\text{CDCl}_3$ ):  $\delta$  1.27-1.27 (m, 9H), 2.58 (s, 3H), 3.82 (s, 3H), 4.54-4.59 (m, 1H), 4.96-5.04 (m, 1H), 5.41-5.48 (m, 1H), 7.22-7.46 (m, 8H).  $^{13}\text{C}$  NMR (75MHz,  $\text{CDCl}_3$ ):  $\delta$  13.3, 27.4, 39.5, 55.3, 77.2, 86.0, 110.7, 114.5, 123.3, 126.8, 128.2, 128.8, 129.0, 130.5, 138.4, 147.6, 150.8, 159.2, 165.3. IR (KBr)  $\nu$  3071, 2980, 2933, 1749, 699  $\text{cm}^{-1}$ . HRMS  $[\text{M}+\text{Na}^+]$ : calcd for  $\text{C}_{23}\text{H}_{24}\text{N}_3\text{O}_5\text{Br}$ , 526.0775, found: 526.0765.

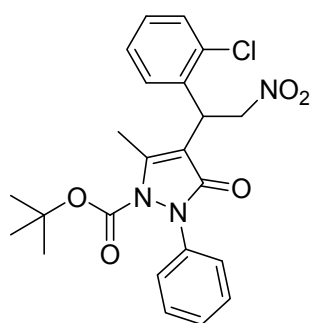

**Tert-butyl**

**4-(1-(2-chlorophenyl)-2-nitroethyl)-5-methyl-3-oxo-2-phenyl-2,3-dihydropyrazole-1-carboxylate(6f)**

Yellow oil, yield: 96%,  $^1\text{H}$  NMR (300MHz,  $\text{CDCl}_3$ ):  $\delta$  1.22-1.24 (m, 9H), 2.65 (s, 3H), 4.84-4.90 (m, 1H), 5.20-5.24 (m, 1H), 5.52-5.60 (m, 1H), 7.22-7.86 (m, 8H).  $^{13}\text{C}$  NMR (75MHz,  $\text{CDCl}_3$ ):  $\delta$  13.8, 27.4, 35.8, 75.1, 86.1, 108.9, 123.4, 126.8, 127.7, 128.8, 129.1, 129.8, 130.1, 130.3, 132.9, 135.4, 138.4, 147.4, 151.9, 165.4. IR (KBr)  $\nu$  3071, 2980, 2933, 1749, 699  $\text{cm}^{-1}$ . HRMS  $[\text{M}+\text{Na}^+]$ : calcd for  $\text{C}_{23}\text{H}_{24}\text{N}_3\text{O}_5\text{Cl}$ , 480.1297, found: 480.1302.

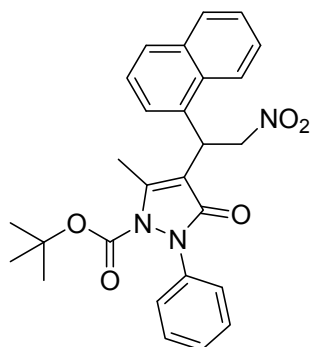

**Tert-butyl**

**5-methyl-4-(1-(naphthalen-1-yl)-2-nitroethyl)-3-oxo-2-phenyl-2,3-dihydropyrazol**

### e-1-carboxylate(6g)

Yield oil, yield: 82%,  $^1\text{H}$  NMR (300MHz,  $\text{CDCl}_3$ ):  $\delta$  1.21-1.28 (m, 9H), 2.55 (s, 3H), 4.89-4.95 (m, 1H), 5.52-5.57 (m, 1H), 5.76-5.83 (m, 1H), 7.32-8.27 (m, 12H).  $^{13}\text{C}$  NMR (75MHz,  $\text{CDCl}_3$ ):  $\delta$  13.7, 27.4, 35.0, 75.8, 86.0, 109.9, 122.0, 123.5, 125.8, 125.9, 126.6, 126.9, 127.1, 128.6, 128.8, 129.3, 129.5, 130.6, 133.5, 134.1, 138.5, 151.6, 165.8. IR (KBr)  $\nu$  3071, 2980, 2933, 1749, 699  $\text{cm}^{-1}$ . HRMS [ $\text{M}+\text{Na}^+$ ]: calcd for  $\text{C}_{27}\text{H}_{27}\text{N}_3\text{O}_5$ , 496.1843, found: 496.1839.

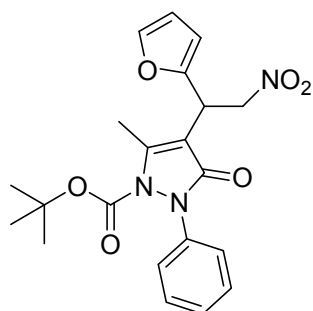

### Tert-butyl

### 4-(1-(furan-2-yl)-2-nitroethyl)-5-methyl-3-oxo-2-phenyl-2,3-dihydropyrazole-1-carboxylate(6h)

Yellow oil, yield: 65%.  $^1\text{H}$  NMR (300MHz,  $\text{CDCl}_3$ ):  $\delta$  1.23-1.27 (m, 9H), 2.59 (s, 3H), 4.79-4.84 (m, 1H), 5.01-5.08 (m, 1H), 5.28-5.36 (m, 1H), 6.29-7.49 (m, 7H).  $^{13}\text{C}$  NMR (75MHz,  $\text{CDCl}_3$ ):  $\delta$  13.3, 27.4, 33.4, 74.3, 86.9, 107.4, 107.9, 110.8, 123.2, 126.8, 128.8, 138.4, 142.1, 147.6, 150.1, 151.6, 164.7. IR (KBr)  $\nu$  3071, 2980, 2933, 1749, 699  $\text{cm}^{-1}$ . HRMS [ $\text{M}+\text{Na}^+$ ]: calcd for  $\text{C}_{21}\text{H}_{23}\text{N}_3\text{O}_6$ , 436.1479, found: 436.1471.

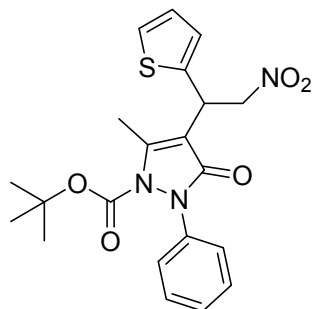

### Tert-butyl

### 5-methyl-4-(2-nitro-1-(thiophen-2-yl)ethyl)-3-oxo-2-phenyl-2,3-dihydropyrazole-



### 1-carboxylate(6i)

Yellow oil, yield: 70%.  $^1\text{H}$  NMR (300MHz,  $\text{CDCl}_3$ ):  $\delta$  1.22-1.28 (m, 9H), 2.60 (s, 3H), 4.89-5.04 (m, 2H), 5.44-5.51 (m, 1H), 6.95-7.45 (m, 8H).  $^{13}\text{C}$  NMR (75MHz,  $\text{CDCl}_3$ ):  $\delta$  13.2, 27.4, 34.8, 76.4, 86.1, 109.9, 123.3, 124.9, 126.8, 127.4, 128.8, 138.4, 139.9, 147.6, 151.0, 164.7. HRMS  $[\text{M}+\text{Na}^+]$ : calcd for  $\text{C}_{21}\text{H}_{23}\text{N}_3\text{O}_5\text{S}$ , 452.1251, found: 436.1247.

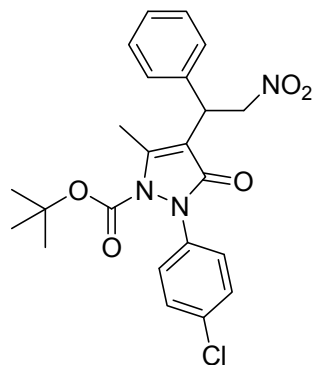

### Tert-butyl

### 2-(4-chlorophenyl)-5-methyl-4-(2-nitro-1-phenylethyl)-3-oxo-2,3-dihydropyrazole-1-carboxylate(6j)

White solid, yield: 94%. m.p. 114-115 °C.  $^1\text{H}$  NMR (300MHz,  $\text{CDCl}_3$ ):  $\delta$  1.27-1.28 (m, 9H), 2.58 (s, 3H), 4.57-4.62 (m, 1H), 4.96-5.03 (m, 1H), 5.50-5.57 (m, 1H), 7.23-7.52 (m, 9H).  $^{13}\text{C}$  NMR (75MHz,  $\text{CDCl}_3$ ):  $\delta$  13.4, 27.5, 40.1, 76.2, 86.3, 110.6, 124.5, 127.8, 128.0, 128.9, 129.2, 132.3, 138.3, 139.0, 147.5, 151.6, 165.3. IR (KBr)  $\nu$  3071, 2980, 2933, 1749, 699  $\text{cm}^{-1}$ . HRMS  $[\text{M}+\text{Na}^+]$ : calcd for  $\text{C}_{23}\text{H}_{24}\text{N}_3\text{O}_5\text{Cl}$ , 480.1297, found: 480.1302.

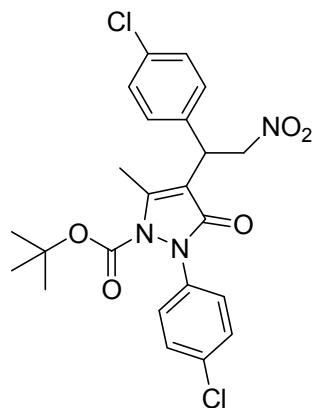

### Tert-butyl

### 2-(4-chlorophenyl)-4-(1-(4-chlorophenyl)-2-nitroethyl)-5-methyl-3-oxo-2,3-dihyd

### ropyrazole-1-carboxylate(6k)

Yellow solid. Yield: 95%. M.p. 122-123 °C. <sup>1</sup>H NMR (300MHz, CDCl<sub>3</sub>): δ 1.27-1.27 (m, 9H), 2.58 (s, 3H), 4.54-4.59 (m, 1H), 4.96-5.04 (m, 1H), 5.41-5.48 (m, 1H), 7.22-7.46 (m, 8H). <sup>13</sup>C NMR (75MHz, CDCl<sub>3</sub>): δ 13.2, 27.4, 34.8, 76.4, 86.1, 109.9, 123.3, 124.9, 126.0, 126.8, 127.4, 128.8, 138.4, 139.9, 147.6, 151.0, 164.7. IR (KBr) ν 3071, 2980, 2933, 1749, 699 cm<sup>-1</sup>. HRMS [M+Na<sup>+</sup>]: calcd for C<sub>23</sub>H<sub>23</sub>N<sub>3</sub>O<sub>5</sub>Cl<sub>2</sub>, 514.0907, found: 514.0909.

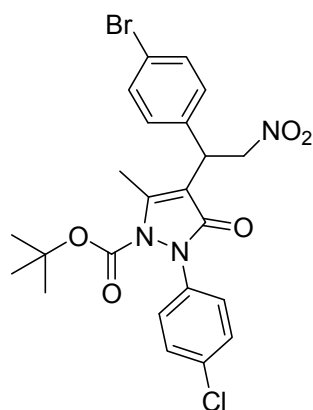

### Tert-butyl

### 4-(1-(4-bromophenyl)-2-nitroethyl)-2-(4-chlorophenyl)-5-methyl-3-oxo-2,3-dihydropyrazole-1-carboxylate(6l)

Yellow solid, yield: 92%, M.p. 128-129 °C. <sup>1</sup>H NMR (300MHz, CDCl<sub>3</sub>): δ 1.26-1.34 (m, 9H), 2.57 (s, 3H), 4.53-4.58 (m, 1H), 4.97-5.03 (m, 1H), 5.40-5.49 (m, 1H), 7.22-7.49 (m, 8H). <sup>13</sup>C NMR (75MHz, CDCl<sub>3</sub>): δ 13.3, 27.4, 40.2, 76.3, 86.0, 110.4, 123.4, 126.8, 127.9, 127.9, 128.8, 129.0, 129.2, 129.3, 138.4, 138.5, 147.6, 151.0, 165.2. IR (KBr) ν 3071, 2980, 2933, 1749, 699 cm<sup>-1</sup>. HRMS [M+Na<sup>+</sup>]: calcd for C<sub>23</sub>H<sub>23</sub>N<sub>3</sub>O<sub>5</sub>ClBr, 558.0402, found: 558.0384.

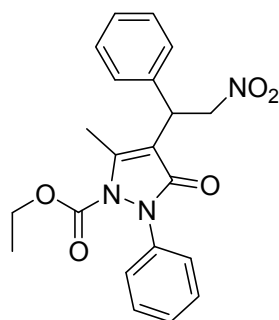

### Ethyl

### 5-methyl-4-(2-nitro-1-phenylethyl)-3-oxo-2-phenyl-2,3-dihydropyrazole-1-carboxylate (6m)

Yellow oil, yield: 98%,  $^1\text{H}$  NMR (300MHz,  $\text{CDCl}_3$ ):  $\delta$  0.96-1.01 (m, 3H), 2.60 (s, 3H), 4.09-4.16 (m, 2H), 4.53-4.63 (m, 1H), 4.98-5.05 (m, 1H), 5.51-5.59 (m, 1H), 7.32-7.59 (m, 10H).  $^{13}\text{C}$  NMR (75MHz,  $\text{CDCl}_3$ ):  $\delta$  13.3, 13.5, 39.6, 64.4, 76.0, 110.6, 122.1, 123.4, 127.1, 128.9, 129.6, 132.3, 137.3, 138.1, 149.3, 151.1, 165.5. IR (KBr)  $\nu$  3071, 2980, 2933, 1749, 699  $\text{cm}^{-1}$ . HRMS [ $\text{M}+\text{Na}^+$ ]: calcd for  $\text{C}_{21}\text{H}_{21}\text{N}_3\text{O}_5$ , 418.1373, found: 418.1376.

### 4 General procedure for the addition of 3 to nitroolefins

A vial charged with benzyl 3-methyl-1-phenyl-1H-pyrazol-5-yl acetate (**3a**) (0.5 mmol), DMAP (0.005 mmol) and  $\text{CH}_2\text{Cl}_2$  (2 mL) was stirred at room temperature, and then nitroolefins **4** (0.75 mmol) was added. The stirring was maintained for the indicated time. The reaction mixture was directly charged onto silica gel column eluted with hexane/ethyl acetate to give the corresponding products **7**.

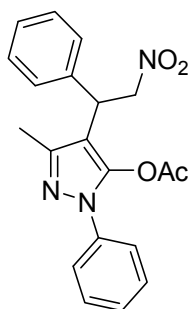

### 3-methyl-4-(2-nitro-1-phenylethyl)-1-phenyl-1H-pyrazol-5-yl acetate (7a)

Yellow solid, yield 95 %. M.p. 110-112 °C.  $^1\text{H}$  NMR (300MHz,  $\text{CDCl}_3$ ):  $\delta$  2.12 (s, 3H), 2.19 (s, 3H), 4.84-4.91 (m, 2H), 4.99-5.05 (m, 1H), 7.28-7.38 (m, 6H), 7.42-7.48 (m, 4H).  $^{13}\text{C}$  NMR (75MHz,  $\text{CDCl}_3$ ):  $\delta$  13.4, 20.2, 38.6, 77.2, 106.7, 123.0, 127.4, 127.7, 129.0, 129.3, 137.6, 141.8, 147.5, 167.3. IR (KBr):  $\nu$  = 3063, 2922, 1792, 1596, 1554, 1502, 1453, 1374, 1168, 757, 697  $\text{cm}^{-1}$ . HRMS [ $\text{M}+\text{Na}^+$ ]: calcd for  $\text{C}_{20}\text{H}_{19}\text{N}_3\text{O}_4\text{Na}$ : 388.1268, found: 388.1270.

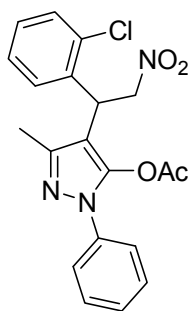

**4-(1-(2-chlorophenyl)-2-nitroethyl)-3-methyl-1-phenyl-1H-pyrazol-5-yl acetate (7b)**

Yellow oil, yield 92 %.  $^1\text{H}$  NMR (300MHz,  $\text{CDCl}_3$ ):  $\delta$  2.08 (s, 3H), 2.24 (s, 3H), 4.81-4.88 (m, 1H), 4.96-5.03 (m, 1H), 5.23-5.30 (m, 1H), 7.23-7.49 (m, 9H).  $^{13}\text{C}$  NMR (75MHz,  $\text{CDCl}_3$ ):  $\delta$  13.3, 20.3, 36.0, 75.5, 105.0, 123.1, 127.1, 127.7, 127.9, 129.1, 129.2, 130.4, 134.1, 134.8, 137.6, 142.0, 147.8, 167.3. IR (KBr):  $\nu$  = 3065, 2924, 1792, 1597, 1555, 1505, 1475, 1435, 1375, 1168, 1040, 758, 737, 695  $\text{cm}^{-1}$ . HRMS [ $\text{M}+\text{Na}^+$ ]: calcd for  $\text{C}_{20}\text{H}_{18}\text{ClN}_3\text{O}_4\text{Na}$ : 422.0878, found: 422.0876.

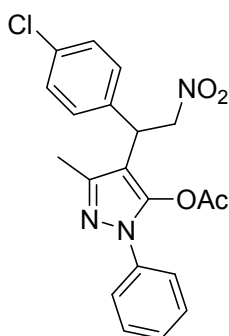

**4-(1-(4-chlorophenyl)-2-nitroethyl)-3-methyl-1-phenyl-1H-pyrazol-5-yl acetate (7c)**

Yellow oil, yield 94 %.  $^1\text{H}$  NMR (300MHz,  $\text{CDCl}_3$ ):  $\delta$  2.15 (s, 3H), 2.17 (s, 3H), 4.79-4.89 (m, 2H), 4.93-5.02 (m, 1H), 7.21-7.46 (m, 9H).  $^{13}\text{C}$  NMR (75MHz,  $\text{CDCl}_3$ ):  $\delta$  13.4, 20.3, 38.2, 77.0, 106.3, 123.0, 127.8, 128.8, 129.1, 129.3, 133.6, 136.2, 137.5, 141.8, 147.3, 167.4. IR (KBr):  $\nu$  = 3066, 2925, 1792, 1721, 1597, 1556, 1505, 1494, 1435, 1375, 1168, 1093, 1014, 911, 886, 824, 760, 734, 695  $\text{cm}^{-1}$ . HRMS [ $\text{M}+\text{Na}^+$ ]: calcd for  $\text{C}_{20}\text{H}_{18}\text{ClN}_3\text{O}_4\text{Na}$ : 422.0878, found: 422.0876.

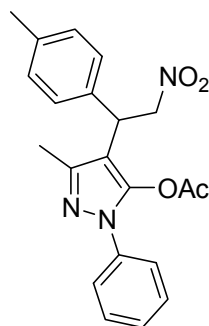

**3-methyl-4-(2-nitro-1-p-tolyethyl)-1-phenyl-1H-pyrazol-5-yl acetate (7d)**

Yellow oil, yield 73 %.  $^1\text{H}$  NMR (300MHz,  $\text{CDCl}_3$ ):  $\delta$  2.13 (s, 3H), 2.19 (s, 3H), 2.34 (s, 3H), 4.78-4.89 (m, 2H), 4.94-5.03 (m, 1H), 7.13-7.19 (brs, 4H), 7.40-7.48 (m, 5H).  $^{13}\text{C}$  NMR (75MHz,  $\text{CDCl}_3$ ):  $\delta$  13.4, 20.3, 21.0, 38.4, 77.3, 106.8, 123.0, 127.2, 127.6, 129.2, 129.6, 134.6, 137.3, 137.7, 141.7, 147.5, 167.3. IR (KBr):  $\nu$  = 3027, 2923, 1792, 1598, 1555, 1504, 1434, 1375, 1323, 1168, 1072, 1006, 886, 814, 759, 696  $\text{cm}^{-1}$ . HRMS [ $\text{M}+\text{Na}^+$ ]: calcd for  $\text{C}_{21}\text{H}_{21}\text{N}_3\text{O}_4\text{Na}$ : 402.1424, found: 402.1427.

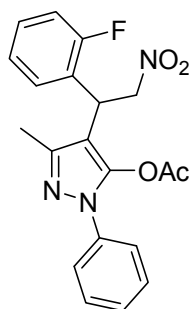

**4-(1-(2-fluorophenyl)-2-nitroethyl)-3-methyl-1-phenyl-1H-pyrazol-5-yl acetate (7e)**

Yellow oil, yield 82 %.  $^1\text{H}$  NMR (300MHz,  $\text{CDCl}_3$ ):  $\delta$  2.13 (s, 3H), 2.28 (s, 3H), 4.88-4.95 (m, 1H), 5.02-5.12 (m, 2H), 7.06-7.46 (m, 9H).  $^{13}\text{C}$  NMR (75MHz,  $\text{CDCl}_3$ ):  $\delta$  13.2, 20.2, 33.0, 75.8, 105.3, 116.0, 116.3, 123.0, 124.4, 124.5, 127.7, 128.3, 128.4, 129.2, 129.5, 129.6, 137.6, 141.9, 147.4, 158.9, 162.2, 167.1. IR (KBr):  $\nu$  = 3067, 2925, 1793, 1724, 1597, 1585, 1557, 1505, 1493, 1456, 1435, 1376, 1234, 1168, 1108, 1046, 1006, 912, 885, 808, 759, 735, 695  $\text{cm}^{-1}$ . HRMS [ $\text{M}+\text{Na}^+$ ]: calcd for  $\text{C}_{20}\text{H}_{18}\text{FN}_3\text{O}_4\text{Na}$ : 406.1174, found: 406.1176.

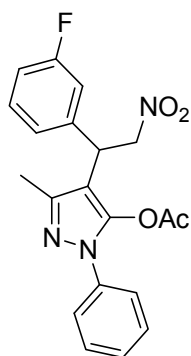

**4-(1-(3-fluorophenyl)-2-nitroethyl)-3-methyl-1-phenyl-1H-pyrazol-5-yl acetate (7f)**

Yellow oil, yield 88 %.  $^1\text{H}$  NMR (300MHz,  $\text{CDCl}_3$ ):  $\delta$  2.14 (s, 3H), 2.18 (s, 3H), 4.81-4.89 (m, 2H), 4.95-5.03 (m, 1H), 6.97-7.08 (m, 5H); 7.28-7.47 (m, 4H).  $^{13}\text{C}$  NMR (75MHz,  $\text{CDCl}_3$ ):  $\delta$  13.3, 20.2, 38.4, 76.9, 106.2, 114.5, 114.6, 114.8, 114.9, 123.1, 127.8, 129.0, 129.3, 130.5, 130.6, 137.5, 140.2, 140.3, 141.8, 147.3, 161.4, 164.6, 167.3. IR (KBr):  $\nu$  = 3066, 2925, 1792, 1613, 1595, 1555, 1505, 1491, 1436, 1375, 1257, 1168, 1047, 1006, 883, 786, 759, 696  $\text{cm}^{-1}$ . HRMS  $[\text{M}+\text{Na}^+]$ : calcd for  $\text{C}_{20}\text{H}_{18}\text{FN}_3\text{O}_4\text{Na}$ : 406.1174, found: 406.1179.

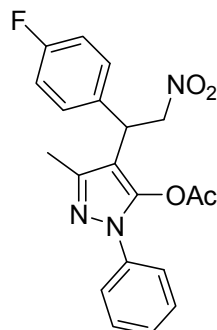

**4-(1-(4-fluorophenyl)-2-nitroethyl)-3-methyl-1-phenyl-1H-pyrazol-5-yl acetate (7g)**

Yellow oil, yield 83 %.  $^1\text{H}$  NMR (300MHz,  $\text{CDCl}_3$ ):  $\delta$  2.14 (s, 3H), 2.16 (s, 3H), 4.79-4.89 (m, 2H), 4.92-5.01 (m, 1H), 7.01-7.07 (m, 2H), 7.23-7.36 (m, 2H), 7.40-7.49 (m, 5H).  $^{13}\text{C}$  NMR (75MHz,  $\text{CDCl}_3$ ):  $\delta$  13.4, 20.3, 38.1, 77.2, 106.6, 115.7, 116.0, 123.0, 127.8, 129.0, 129.3, 133.4, 133.5, 137.6, 141.7, 160.4, 163.7, 167.4. IR (KBr):  $\nu$  = 3070, 2925, 1792, 1598, 1555, 1507, 1475, 1434, 1375, 1228, 1167, 1136, 1046, 1006, 912, 886, 836, 804, 760, 733, 696  $\text{cm}^{-1}$ . HRMS  $[\text{M}+\text{Na}^+]$ : calcd for  $\text{C}_{20}\text{H}_{18}\text{FN}_3\text{O}_4\text{Na}$ : 406.1174, found: 406.1175.

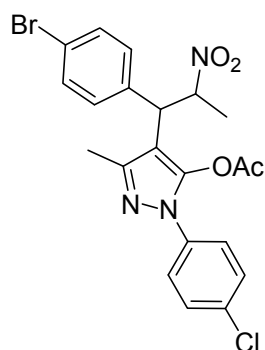

**4-(1-(4-bromophenyl)-2-nitropropyl)-1-(4-chlorophenyl)-3-methyl-1H-pyrazol-5-yl acetate(7h)**

White solid, yield 90 %. M.p. 135-136 °C.  $^1\text{H}$  NMR (300MHz,  $\text{CDCl}_3$ ):  $\delta$  1.52-1.54 (m, 3H), 2.22 (s, 3H), 2.28 (s, 3H), 4.32-4.37 (m, 1H), 5.24-5.28 (m, 1H), 7.14-7.17 (m, 2H), 7.40 (s, 4H), 7.49-7.52 (m, 2H).  $^{13}\text{C}$  NMR (75MHz,  $\text{CDCl}_3$ ):  $\delta$  13.5, 19.7, 20.5, 45.4, 84.2, 107.2, 121.8, 124.3, 129.5, 130.0, 132.3, 133.4, 136.9, 147.8, 166.8. IR (KBr):  $\nu$  = 3097, 3027, 2954, 2924, 2860, 1793, 1730, 1686, 1597, 1579, 1555, 1502, 1467, 1438, 1407, 1374, 1319, 1288, 1166, 1093, 1044, 1012, 910, 886, 833, 733, 691, 649, 503  $\text{cm}^{-1}$ . HRMS [ $\text{M}+\text{Na}^+$ ]: calcd for  $\text{C}_{21}\text{H}_{20}\text{ClN}_3\text{O}_4\text{Na}$ : 436.1035, found: 436.1037.

**5 X-ray analysis**

2a CCDC: 874014

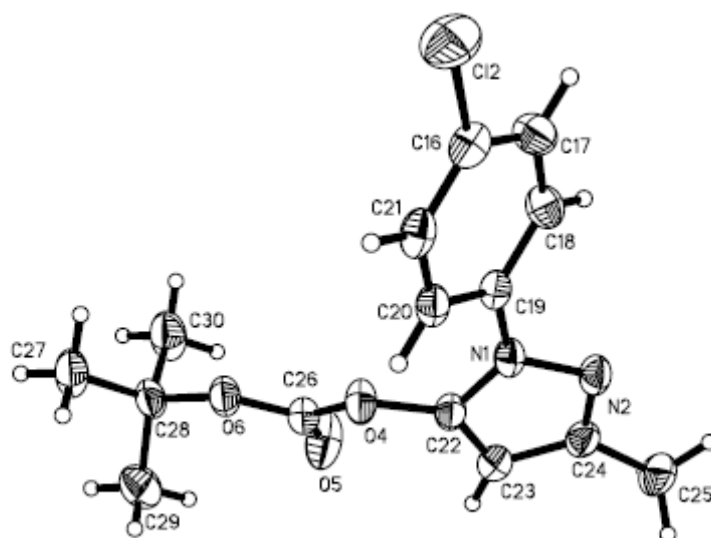

**6j** CCDC: 861353

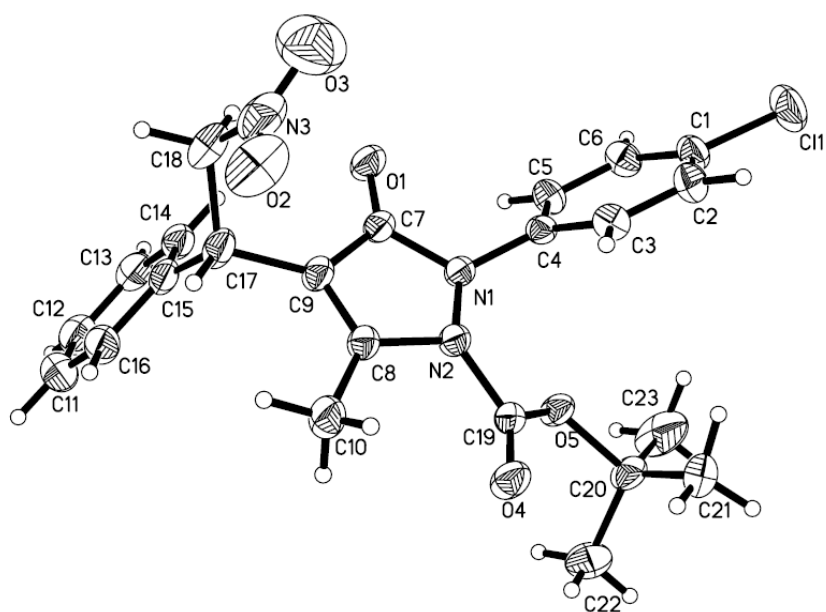

**7h** CCDC: 874398



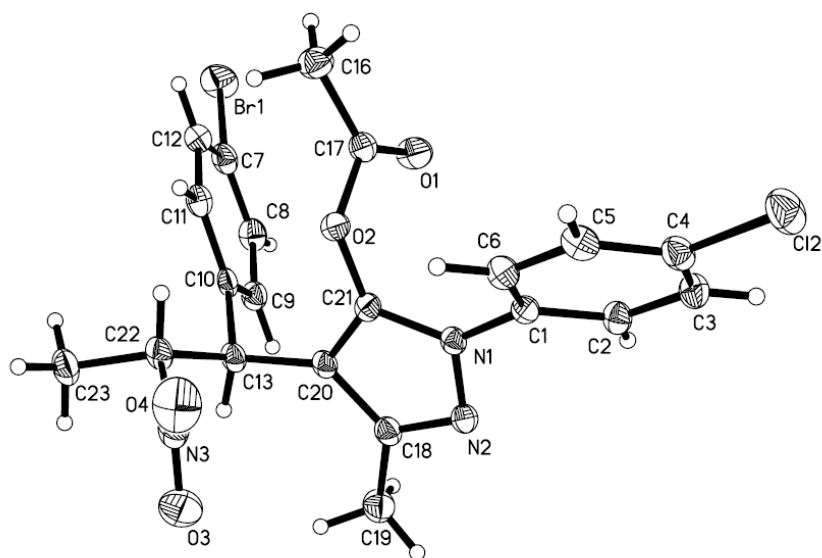

## 6 NMR Spectra of 1–3 and 5–7

### $^1\text{H}$ and $^{13}\text{C}$ of 1a

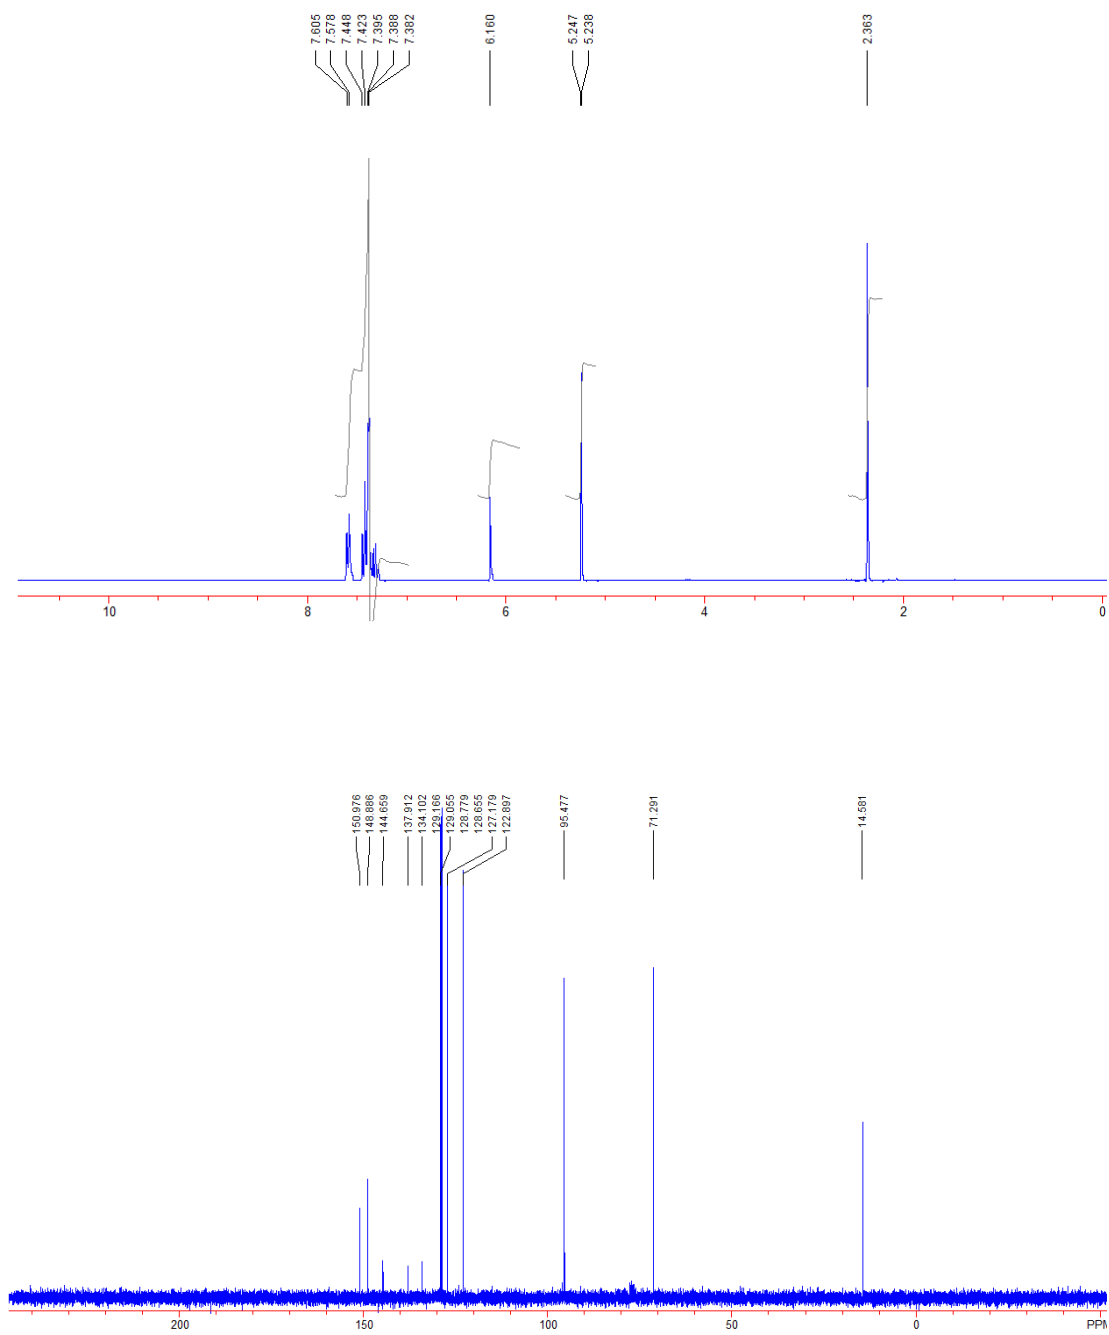

### $^1\text{H}$ and $^{13}\text{C}$ of 1b

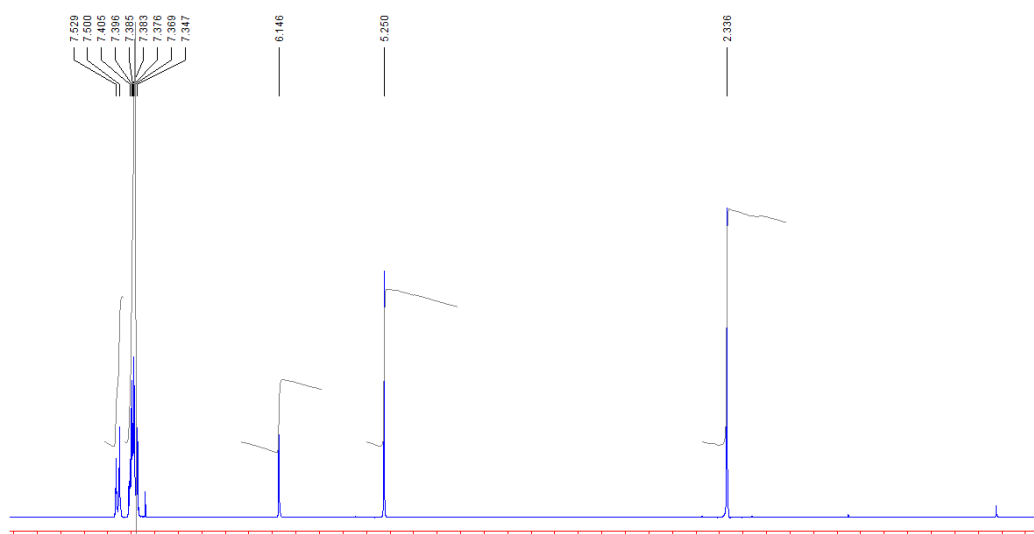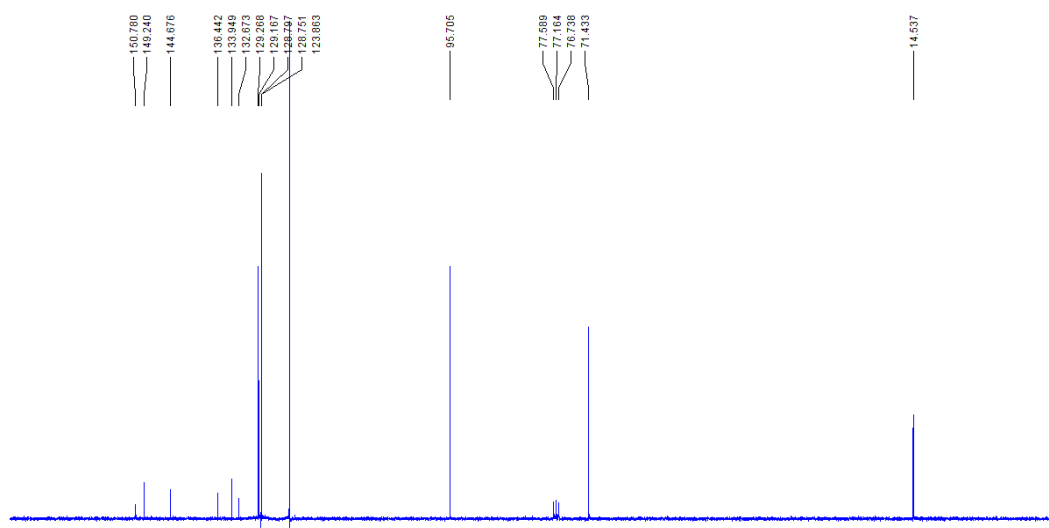

### $^1\text{H}$ and $^{13}\text{C}$ of 2a

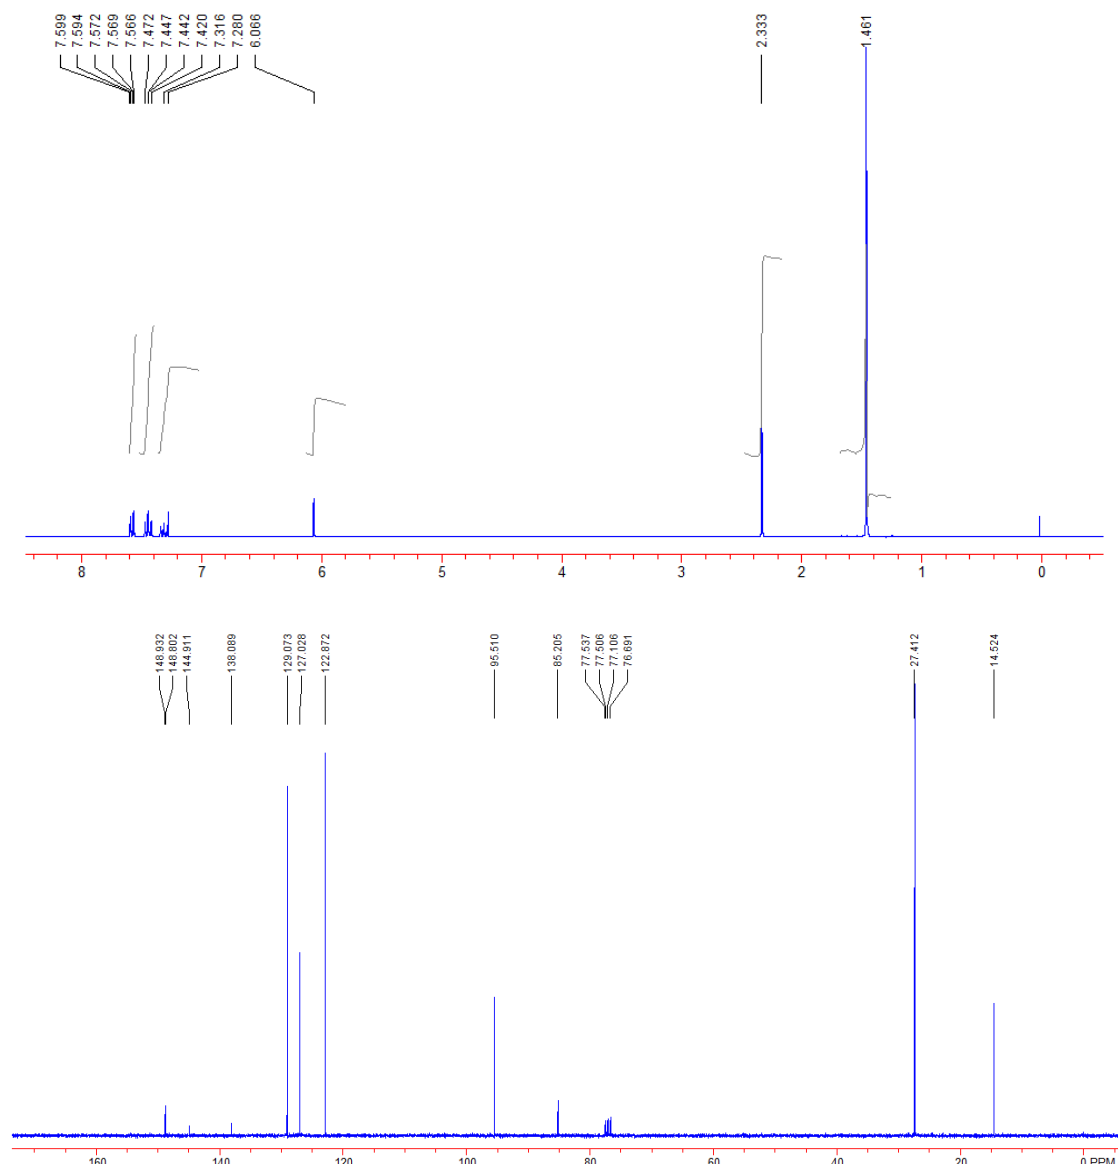

### $^1\text{H}$ and $^{13}\text{C}$ of 2b

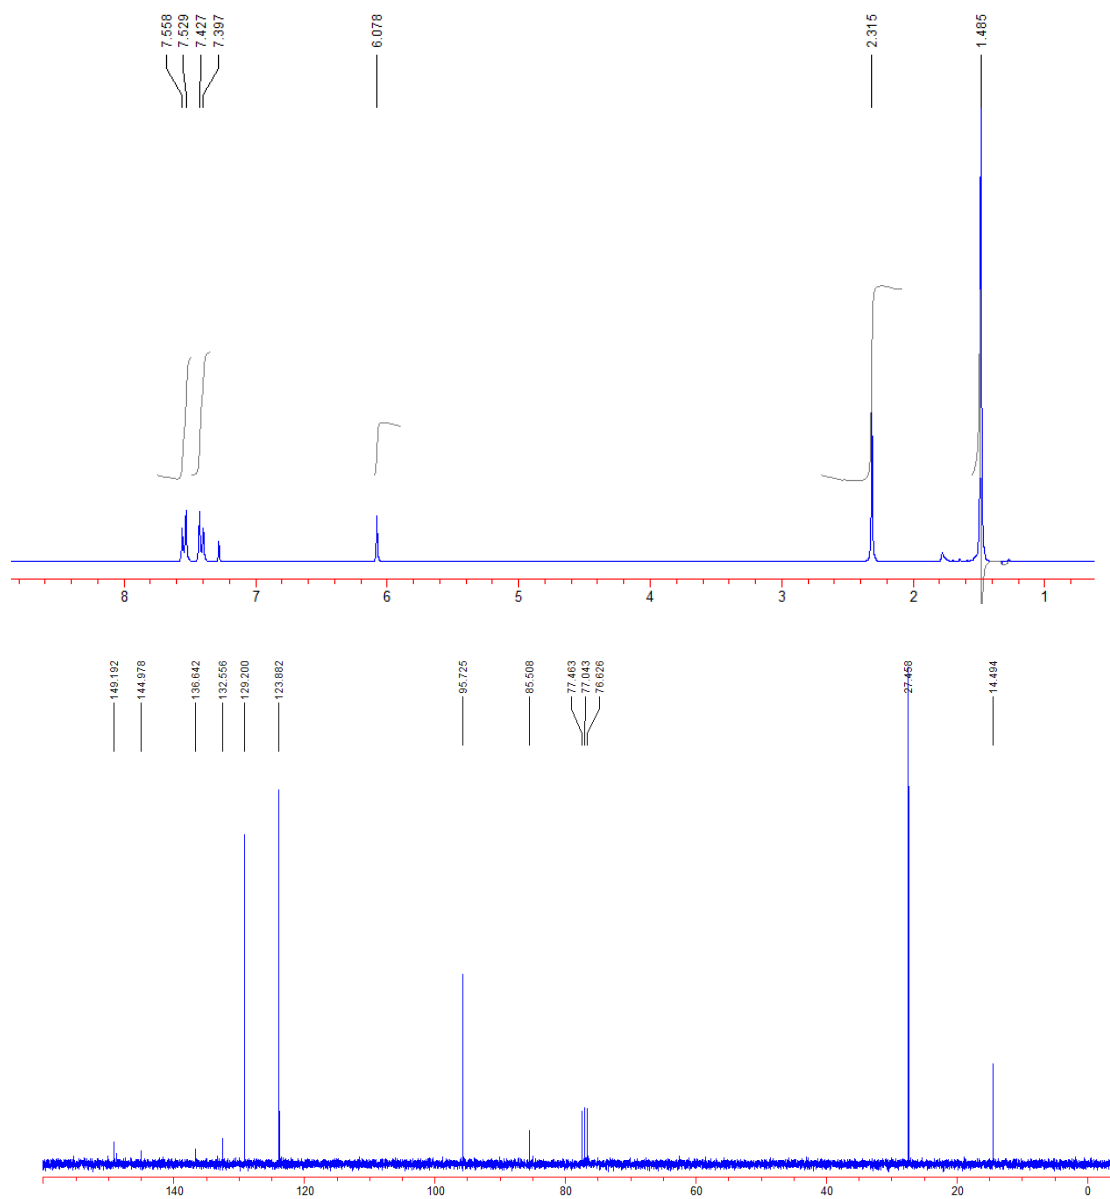

### $^1\text{H}$ and $^{13}\text{C}$ of 2c

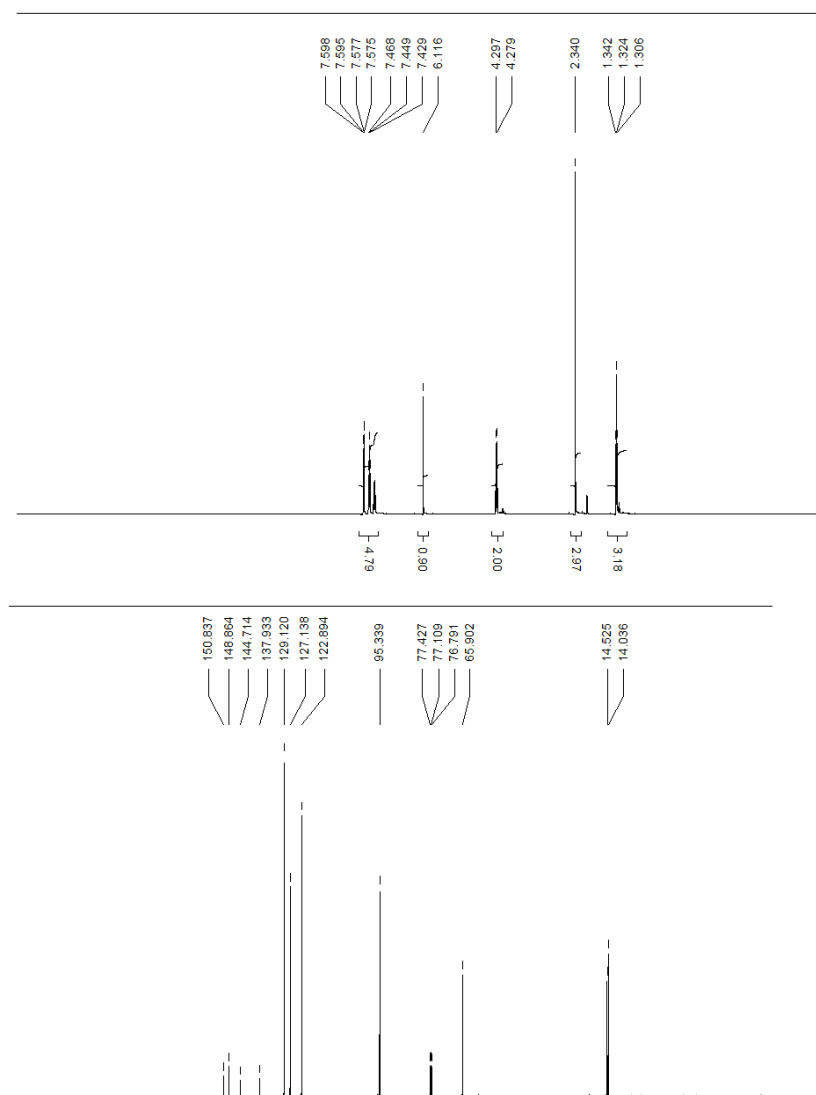

### $^1\text{H}$ and $^{13}\text{C}$ of 3a

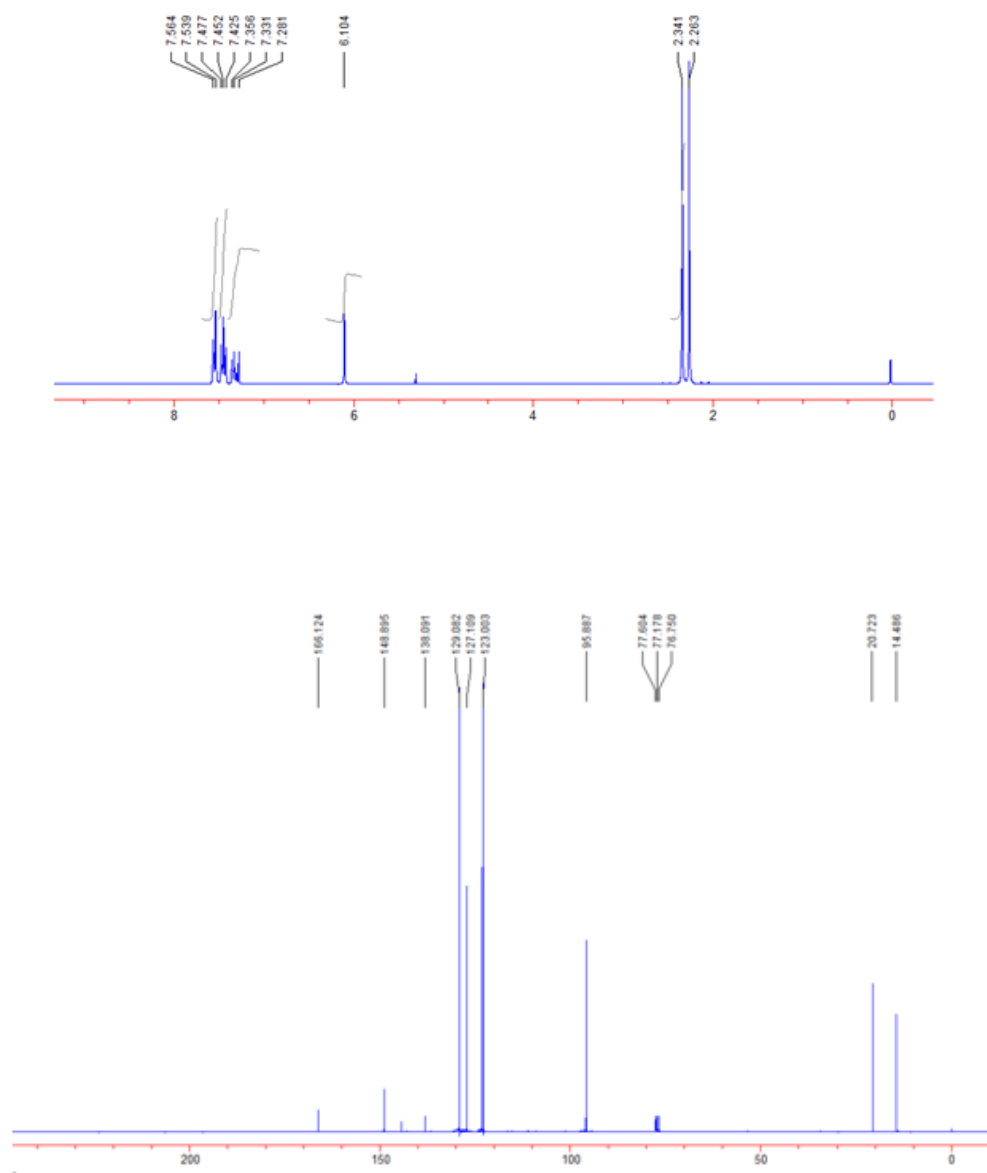

### $^1\text{H}$ and $^{13}\text{C}$ of 3b

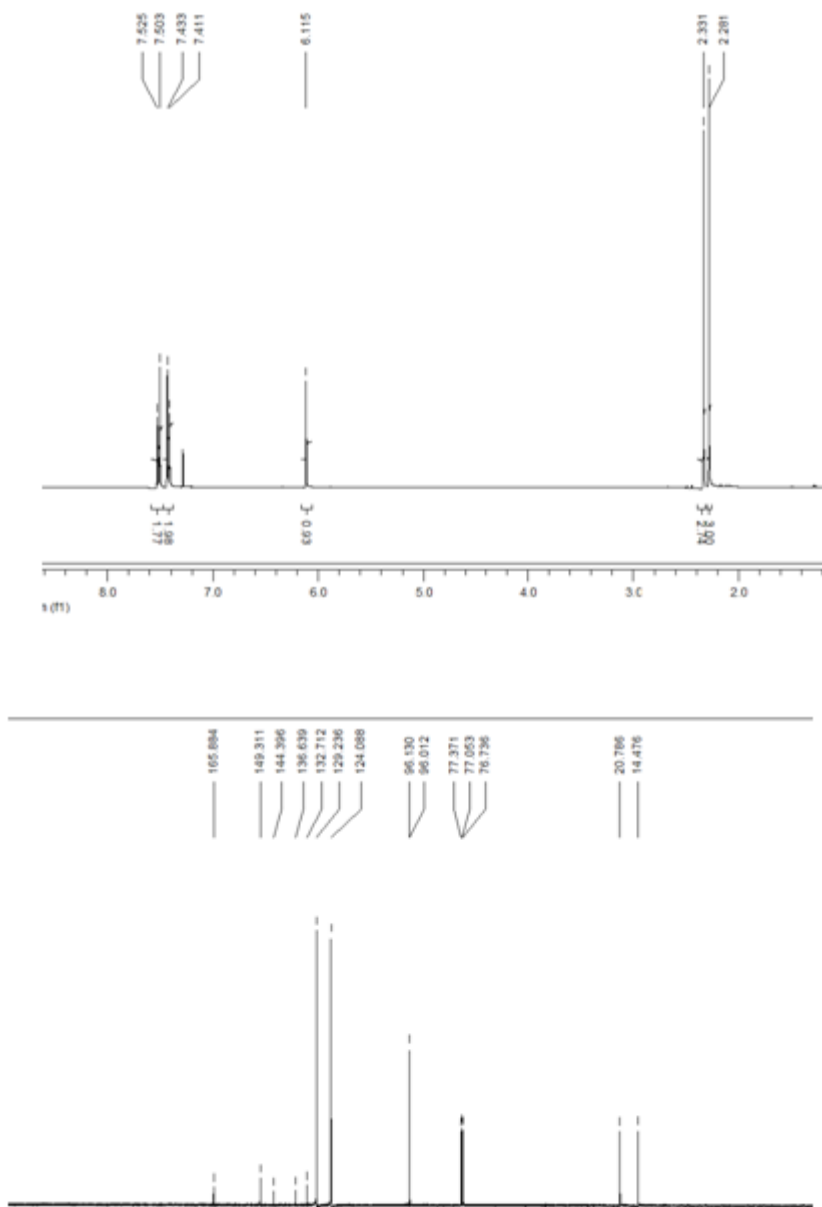



### $^1\text{H}$ and $^{13}\text{C}$ of 5a

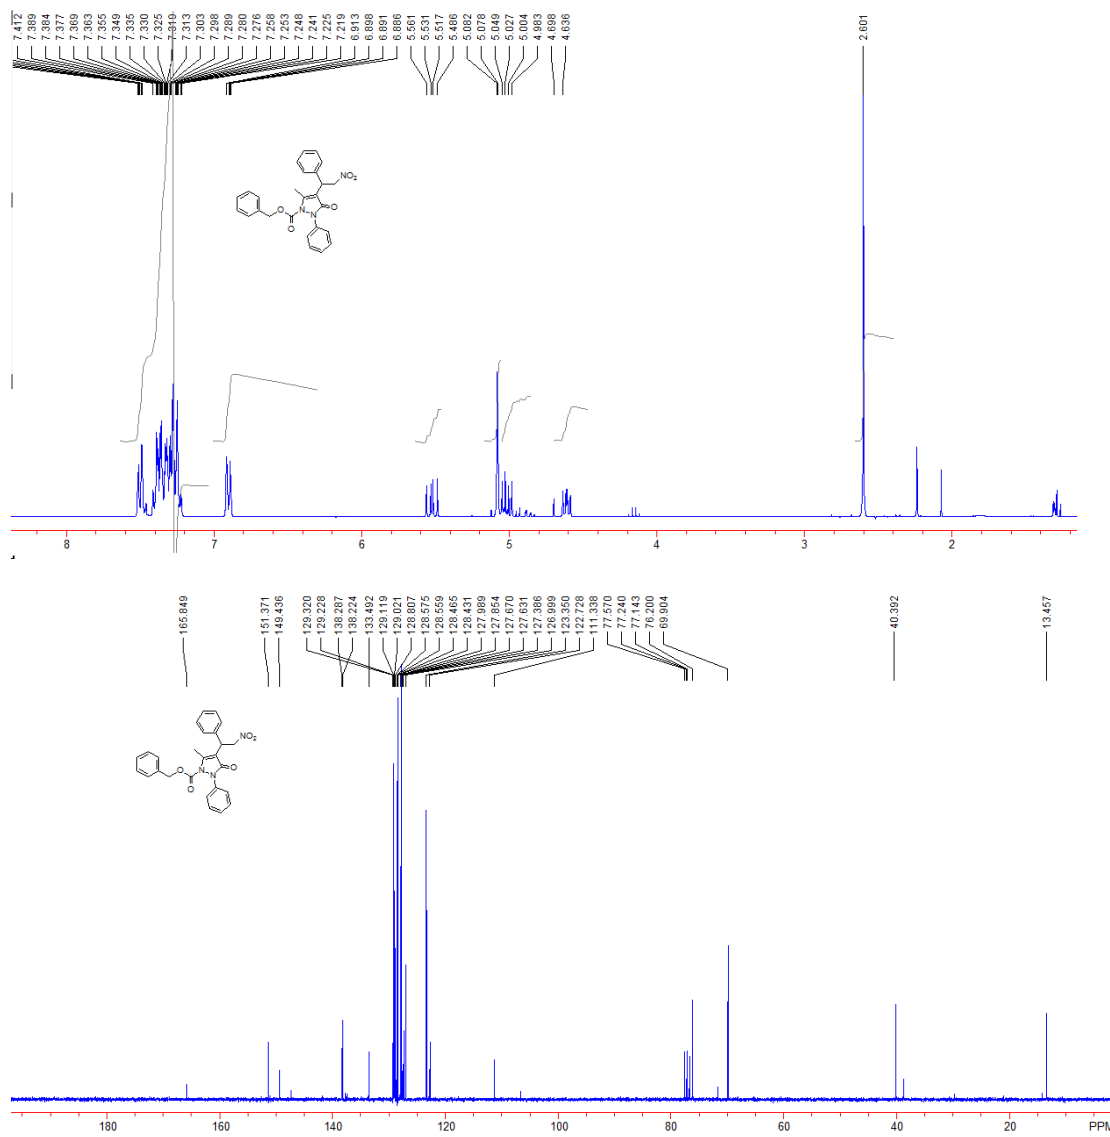

### $^1\text{H}$ and $^{13}\text{C}$ of 5b

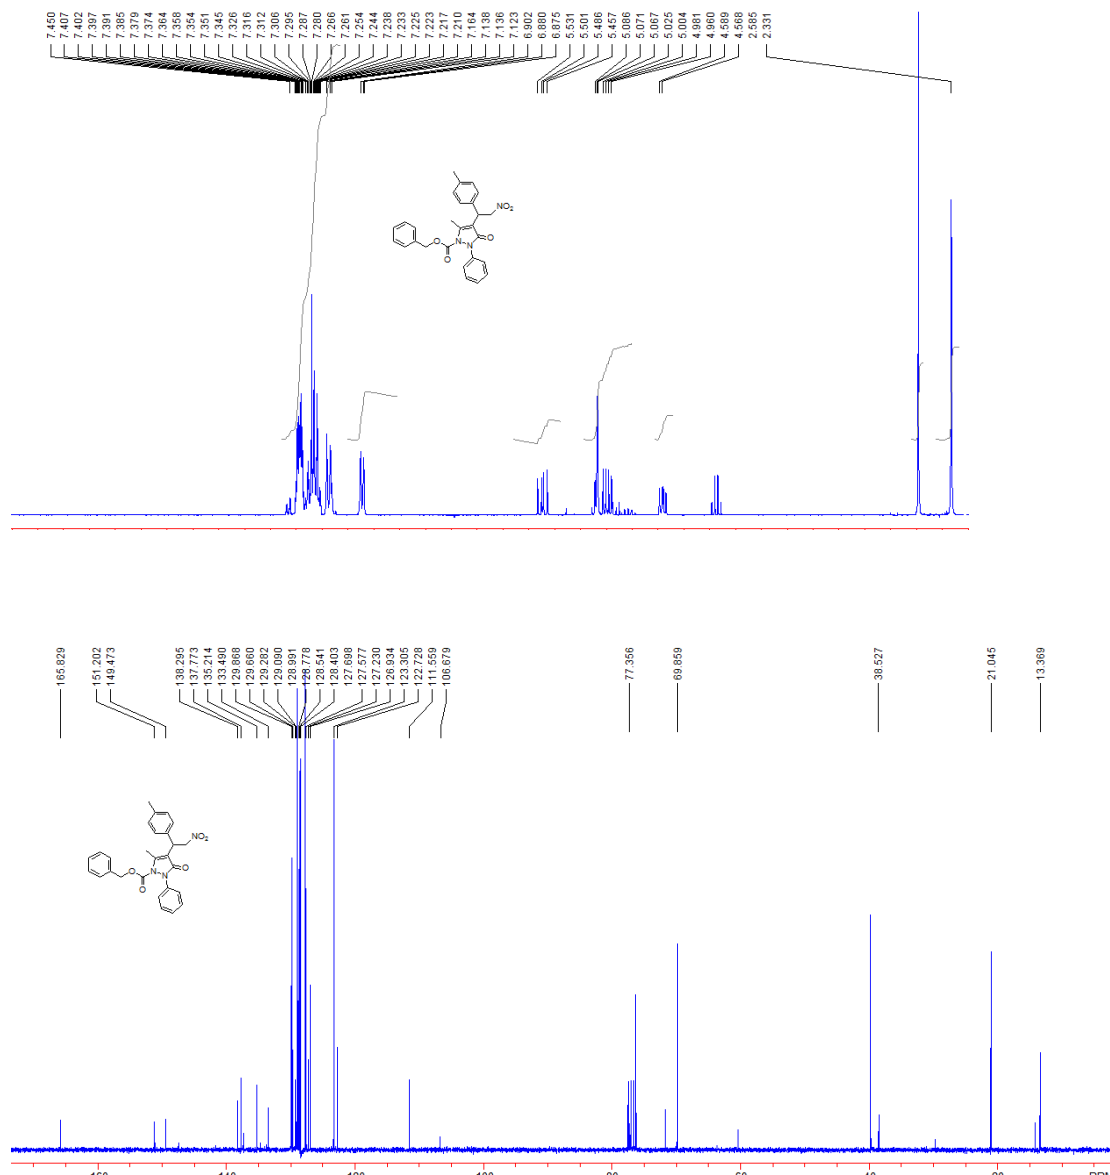

### $^1\text{H}$ and $^{13}\text{C}$ of 5c

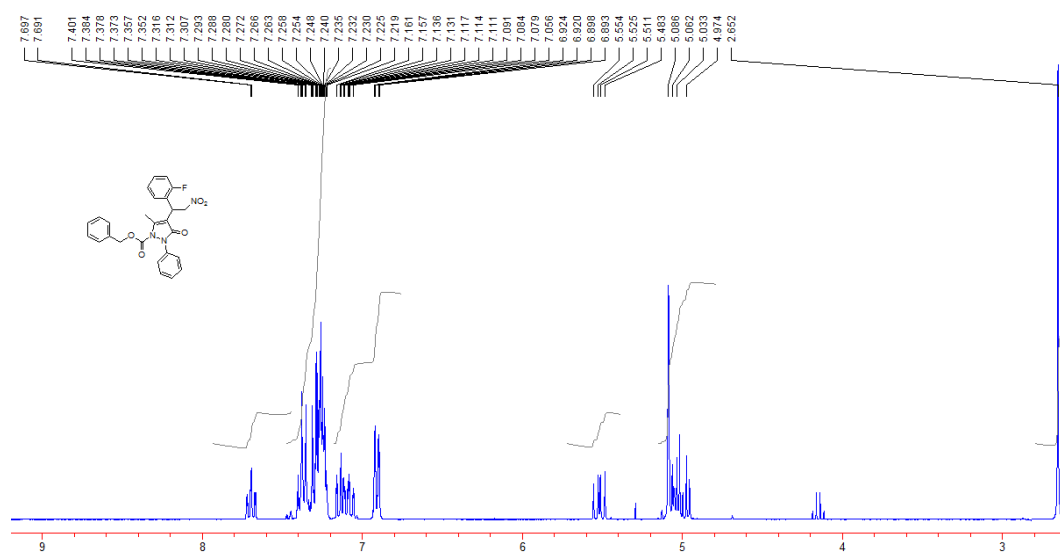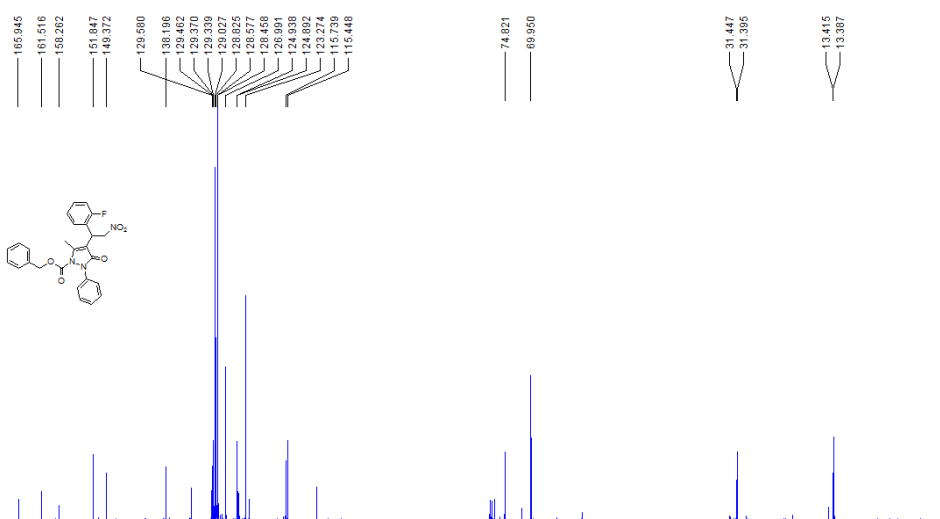

### $^1\text{H}$ and $^{13}\text{C}$ of 5d

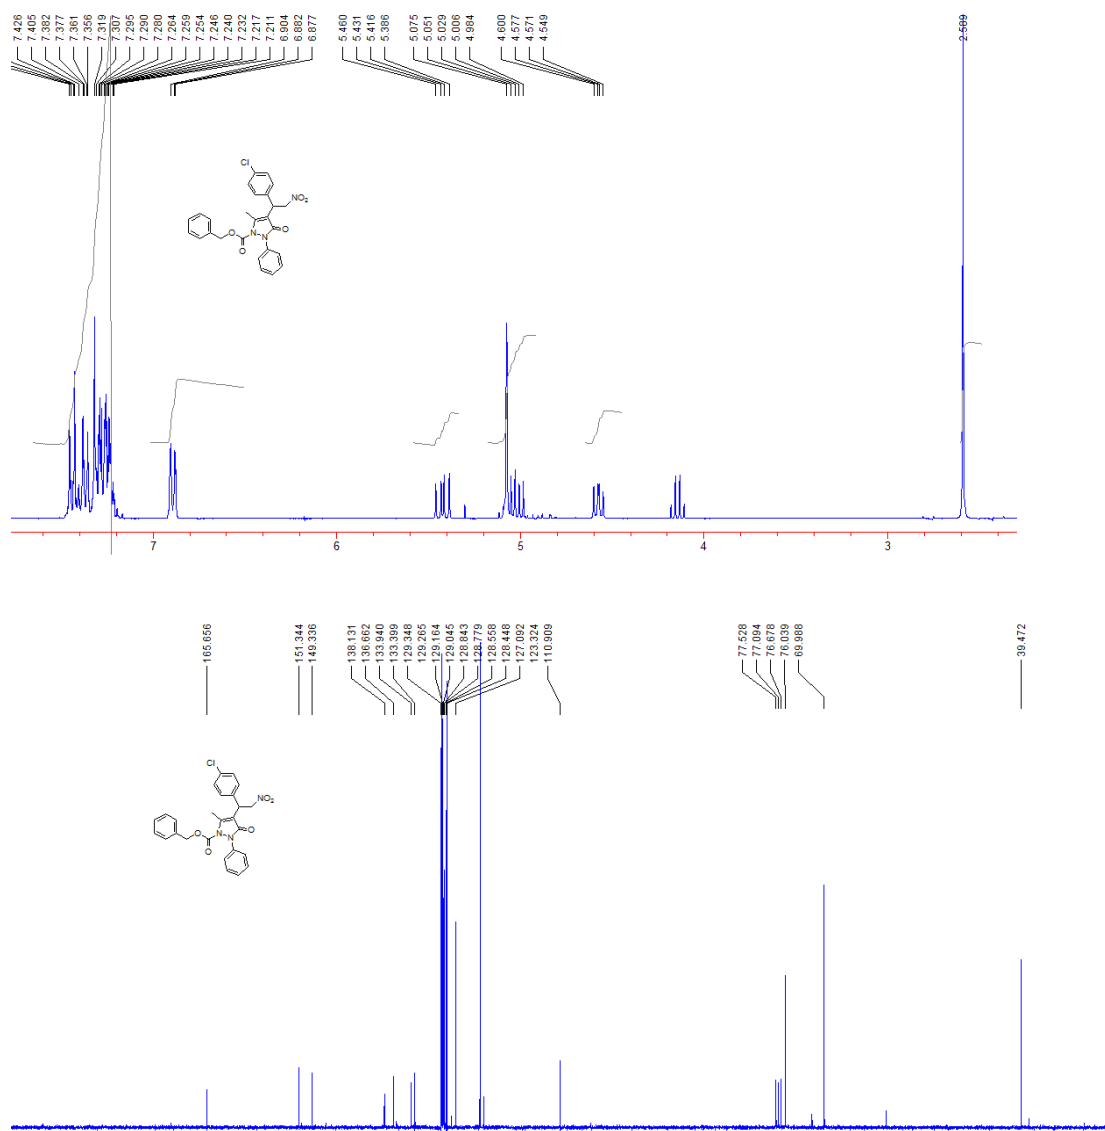

### $^1\text{H}$ and $^{13}\text{C}$ of 5e

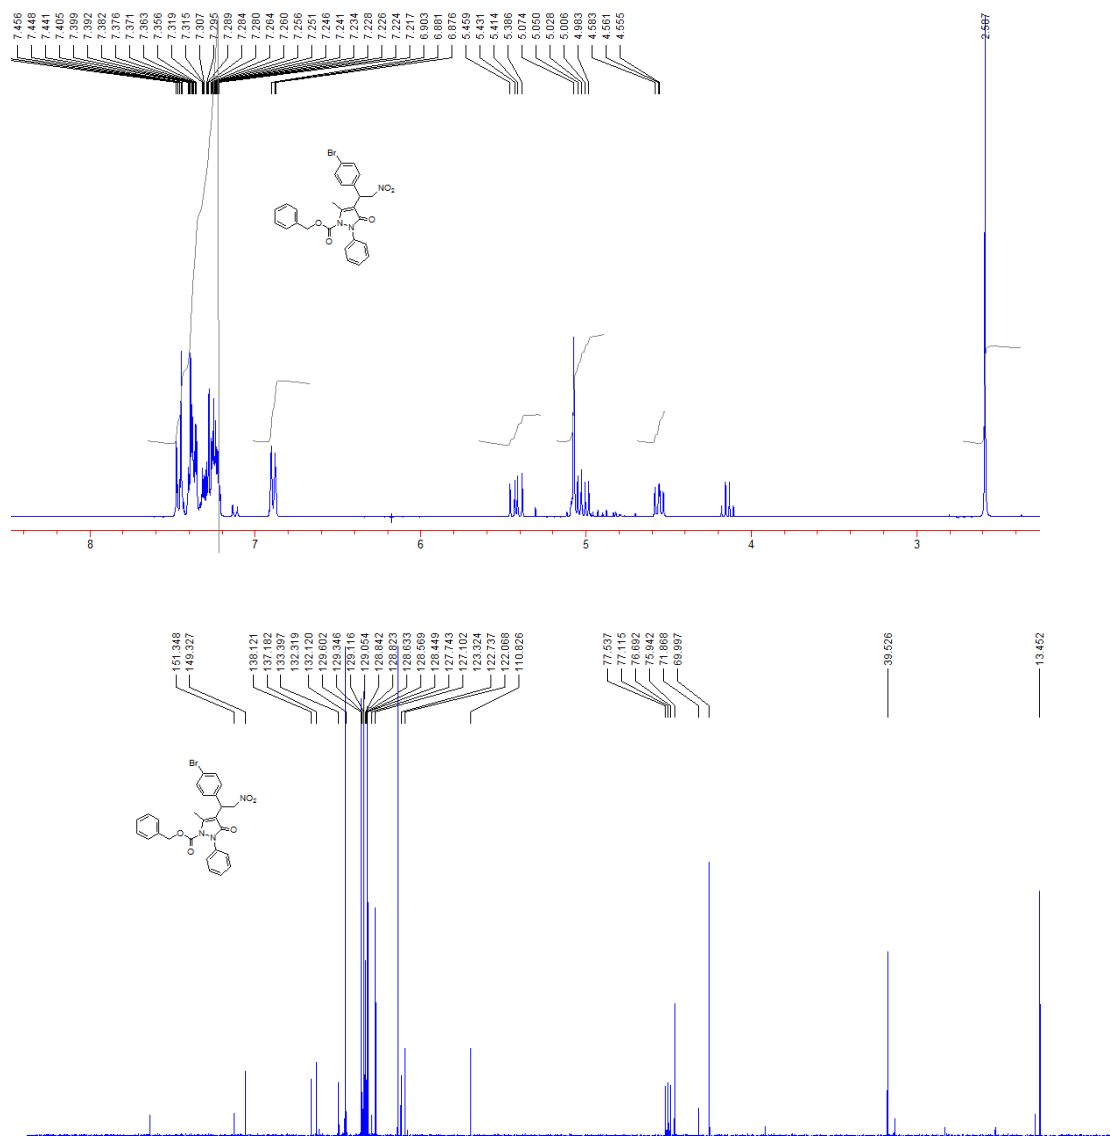

### $^1\text{H}$ and $^{13}\text{C}$ of 5f

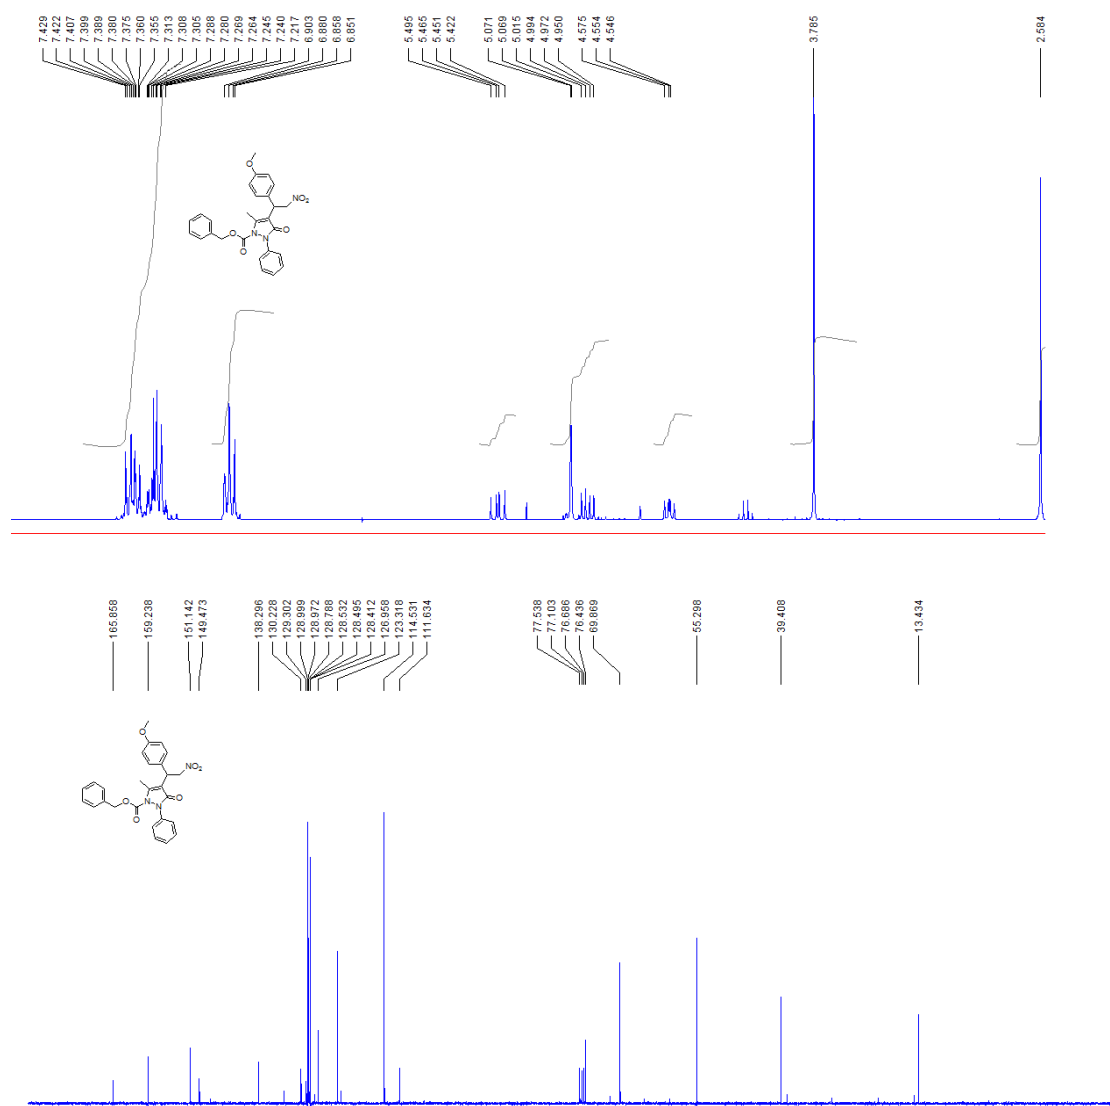

### $^1\text{H}$ and $^{13}\text{C}$ of 5g

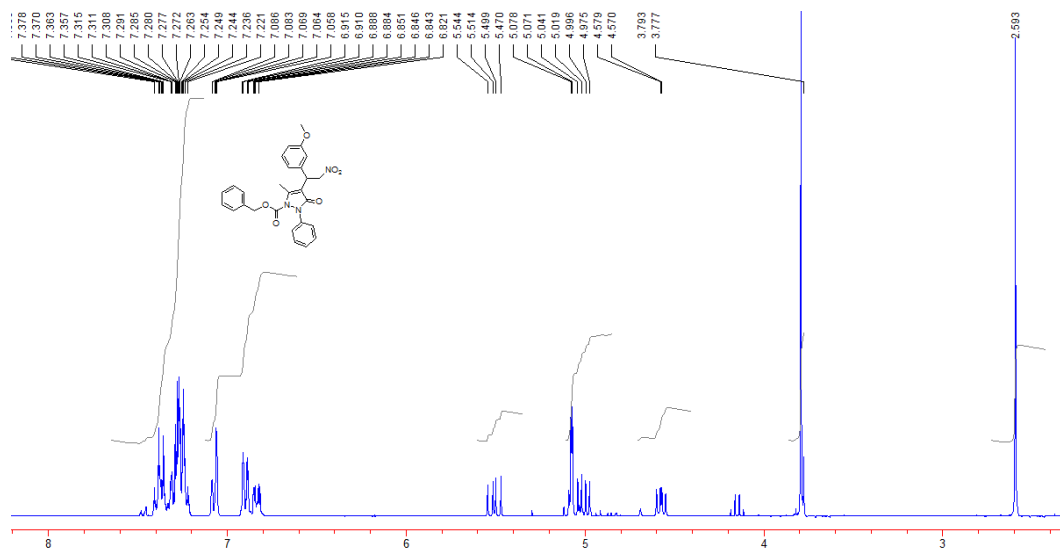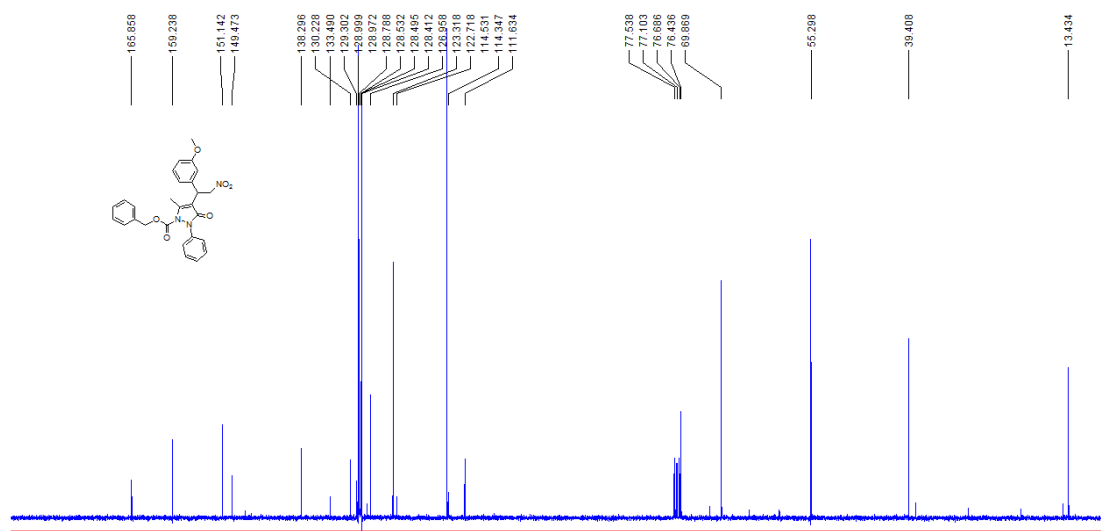

### $^1\text{H}$ and $^{13}\text{C}$ of 5h

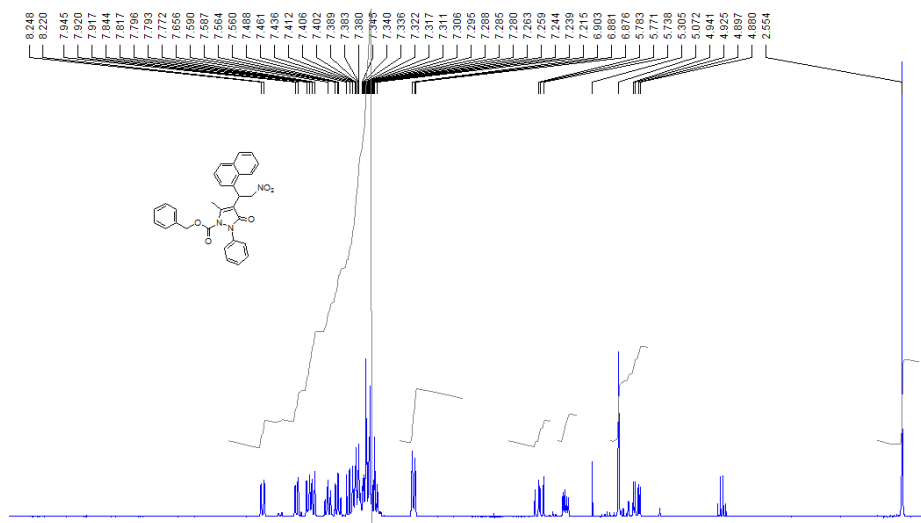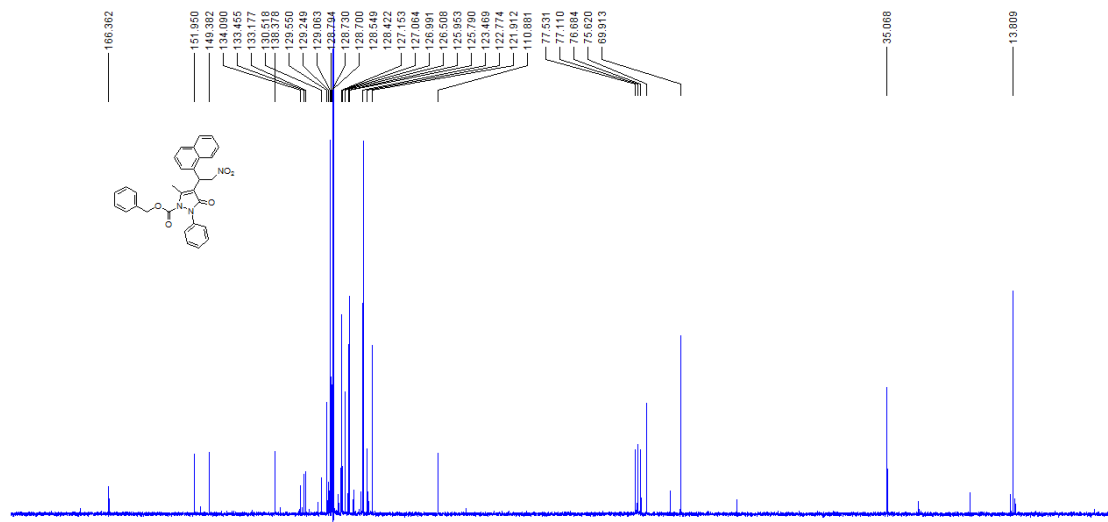



### $^1\text{H}$ and $^{13}\text{C}$ of 5i

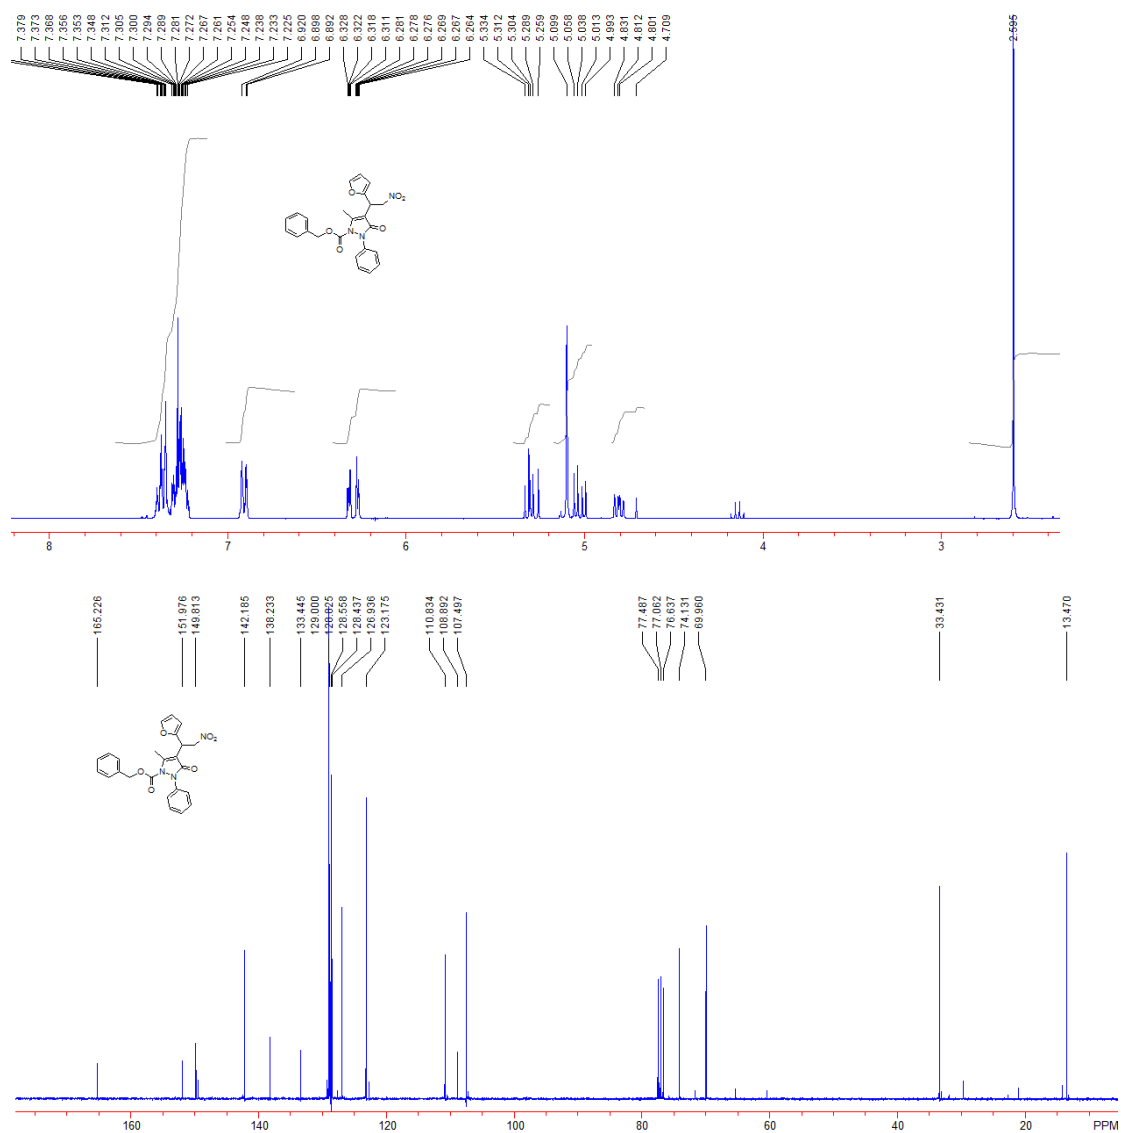

### $^1\text{H}$ and $^{13}\text{C}$ of 5j

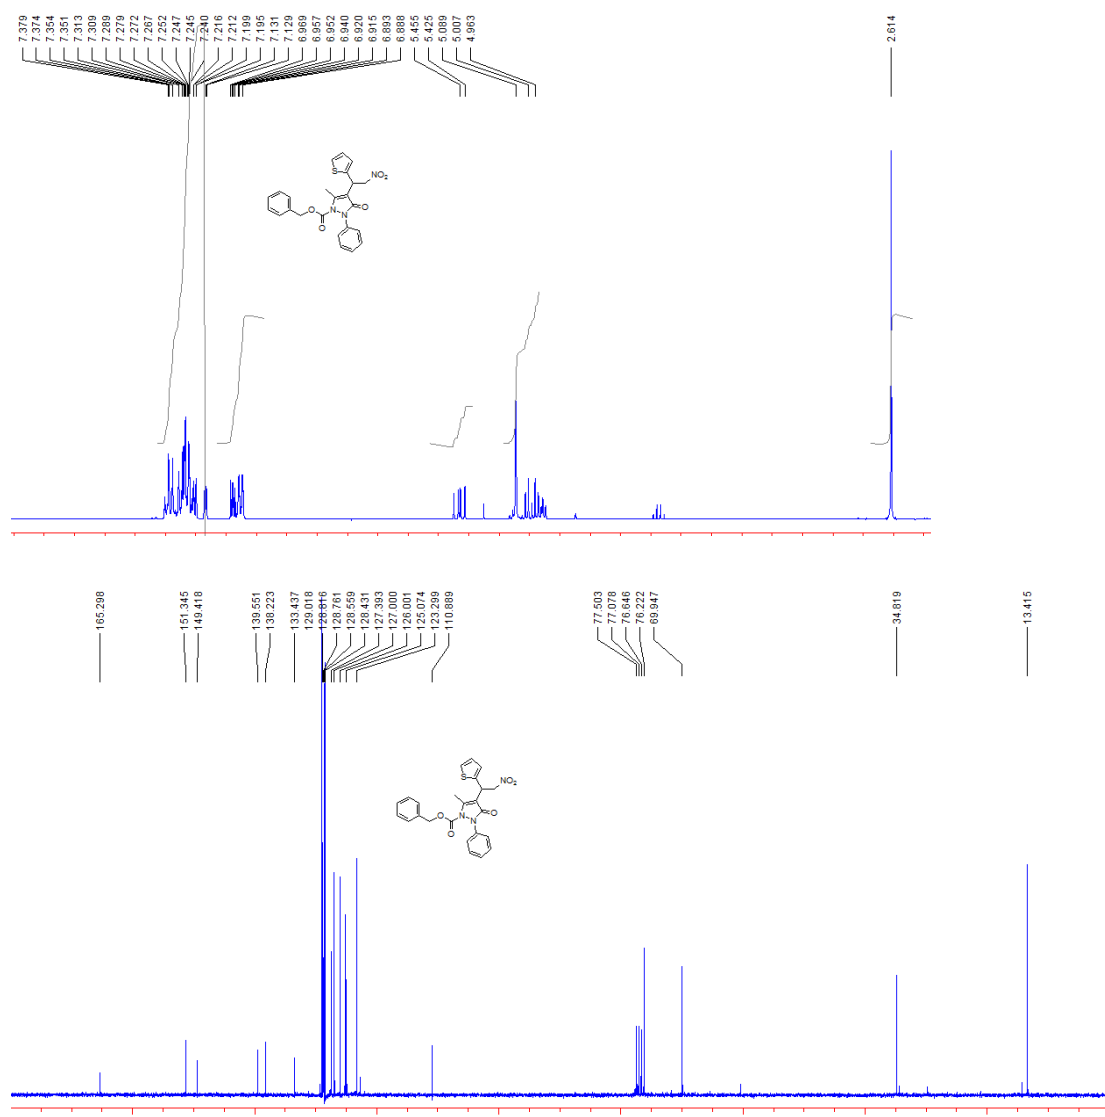

### $^1\text{H}$ and $^{13}\text{C}$ of 5k

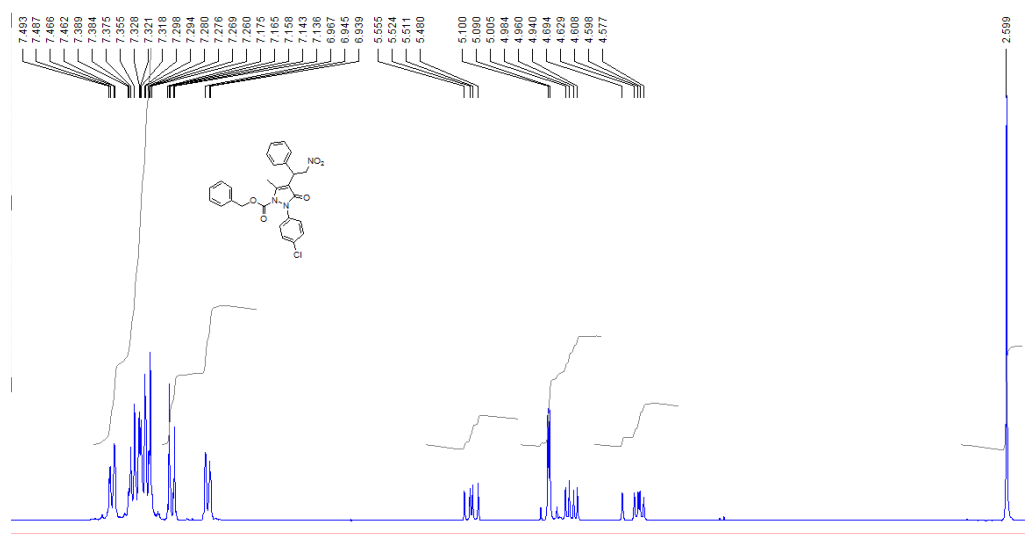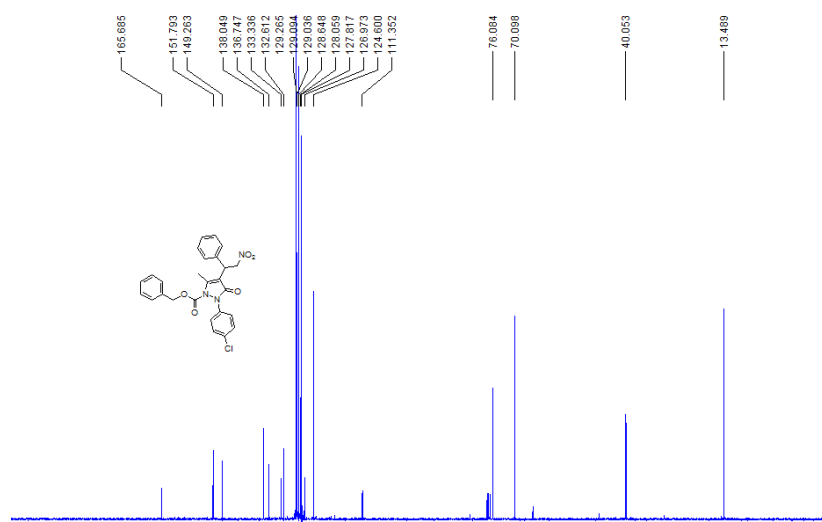

### $^1\text{H}$ and $^{13}\text{C}$ of 5l

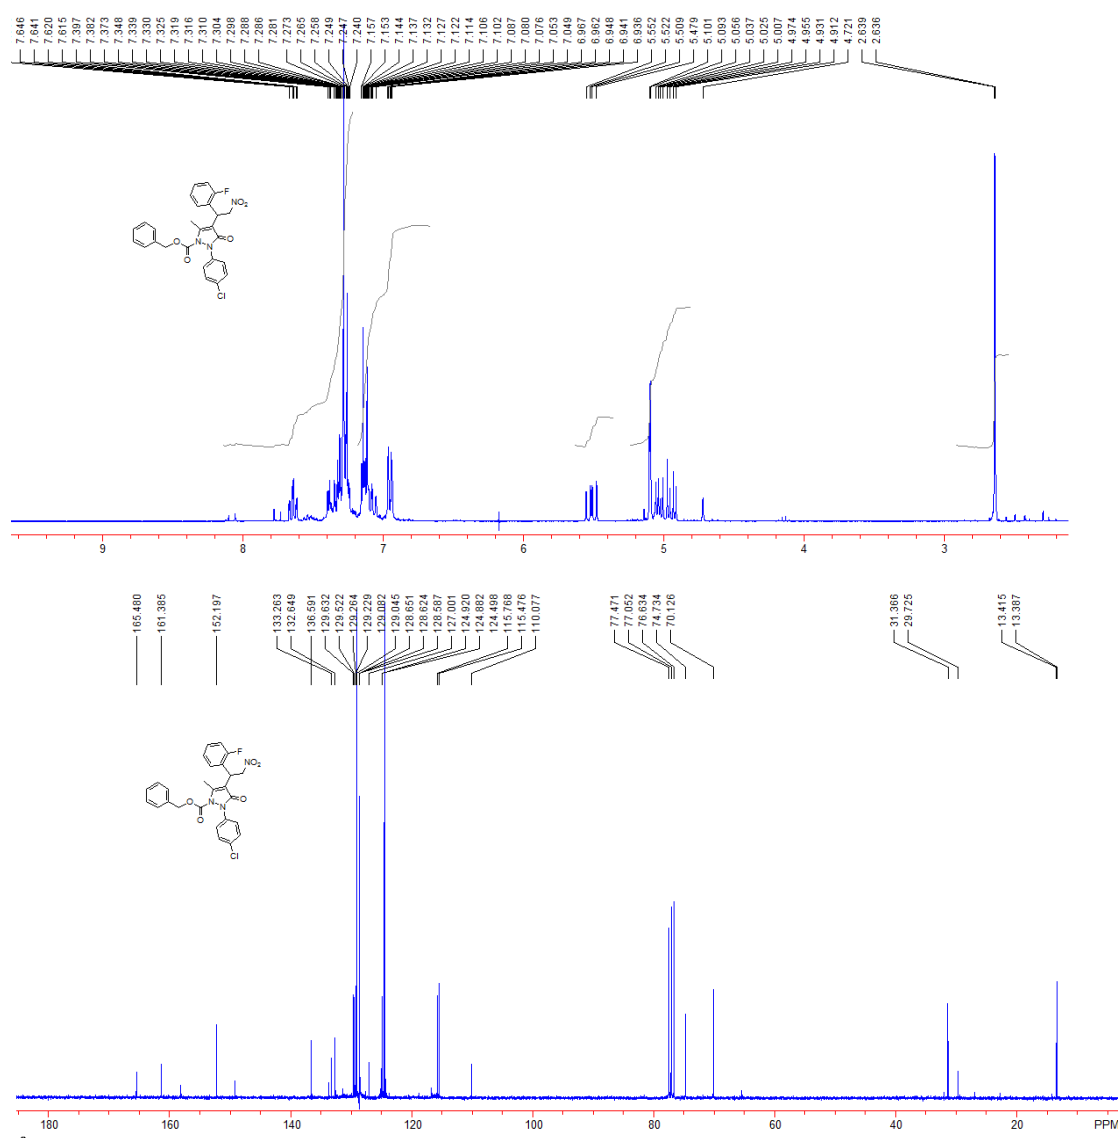

### $^1\text{H}$ and $^{13}\text{C}$ of 5m

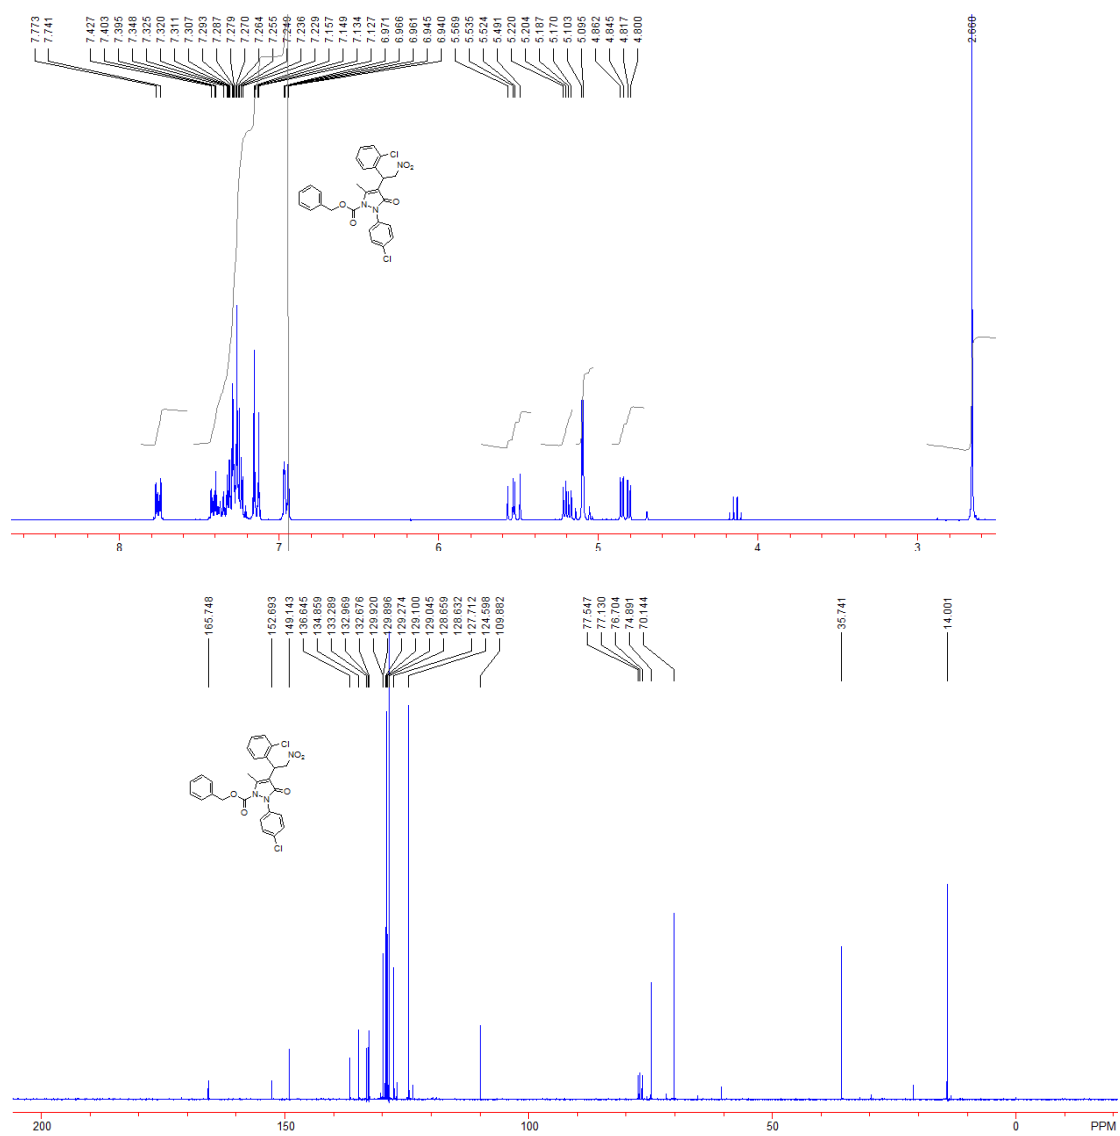

### $^1\text{H}$ and $^{13}\text{C}$ of 6a

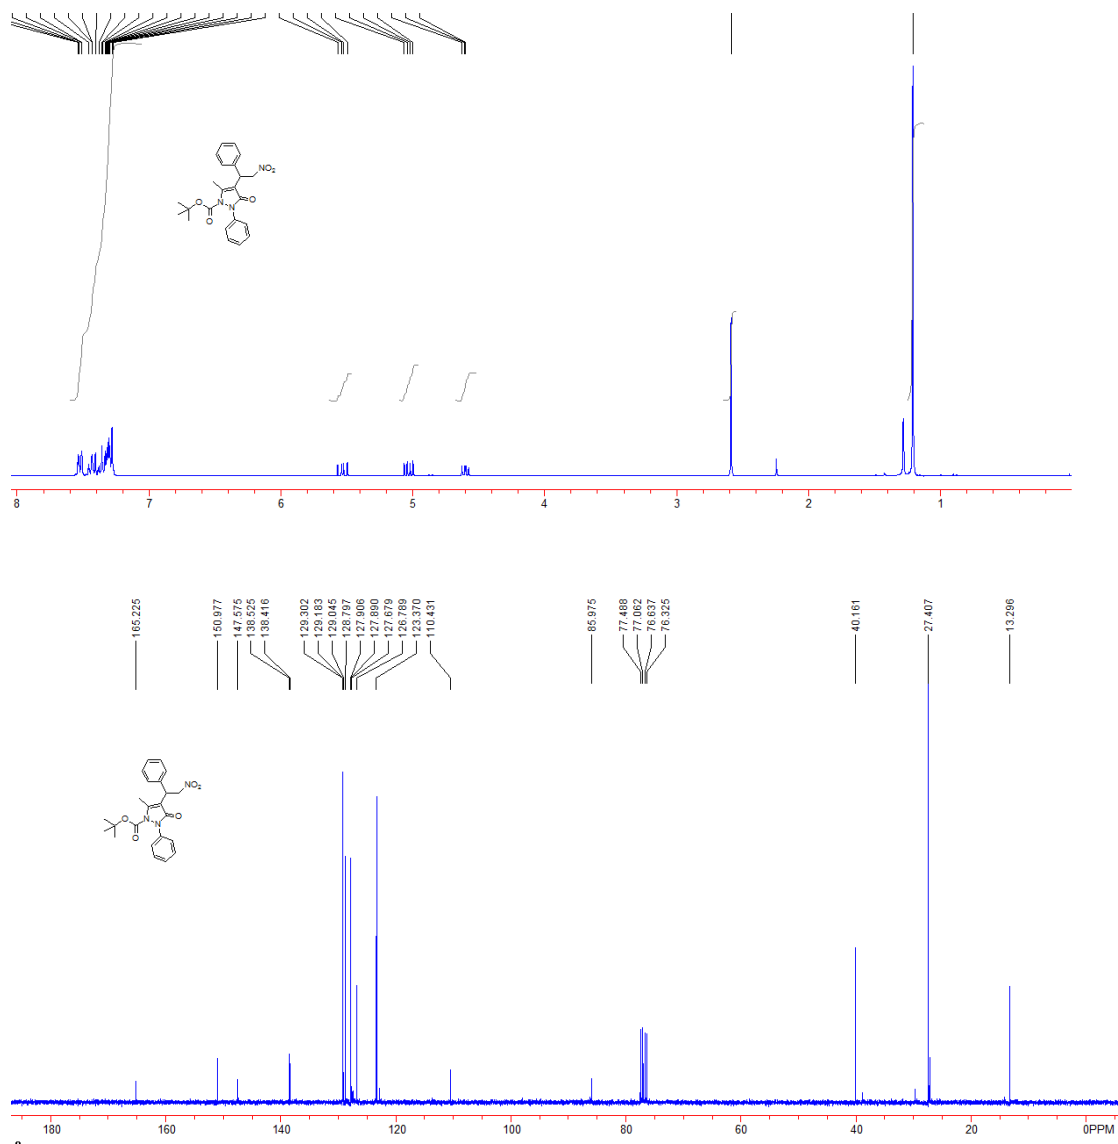

### $^1\text{H}$ and $^{13}\text{C}$ of 6b

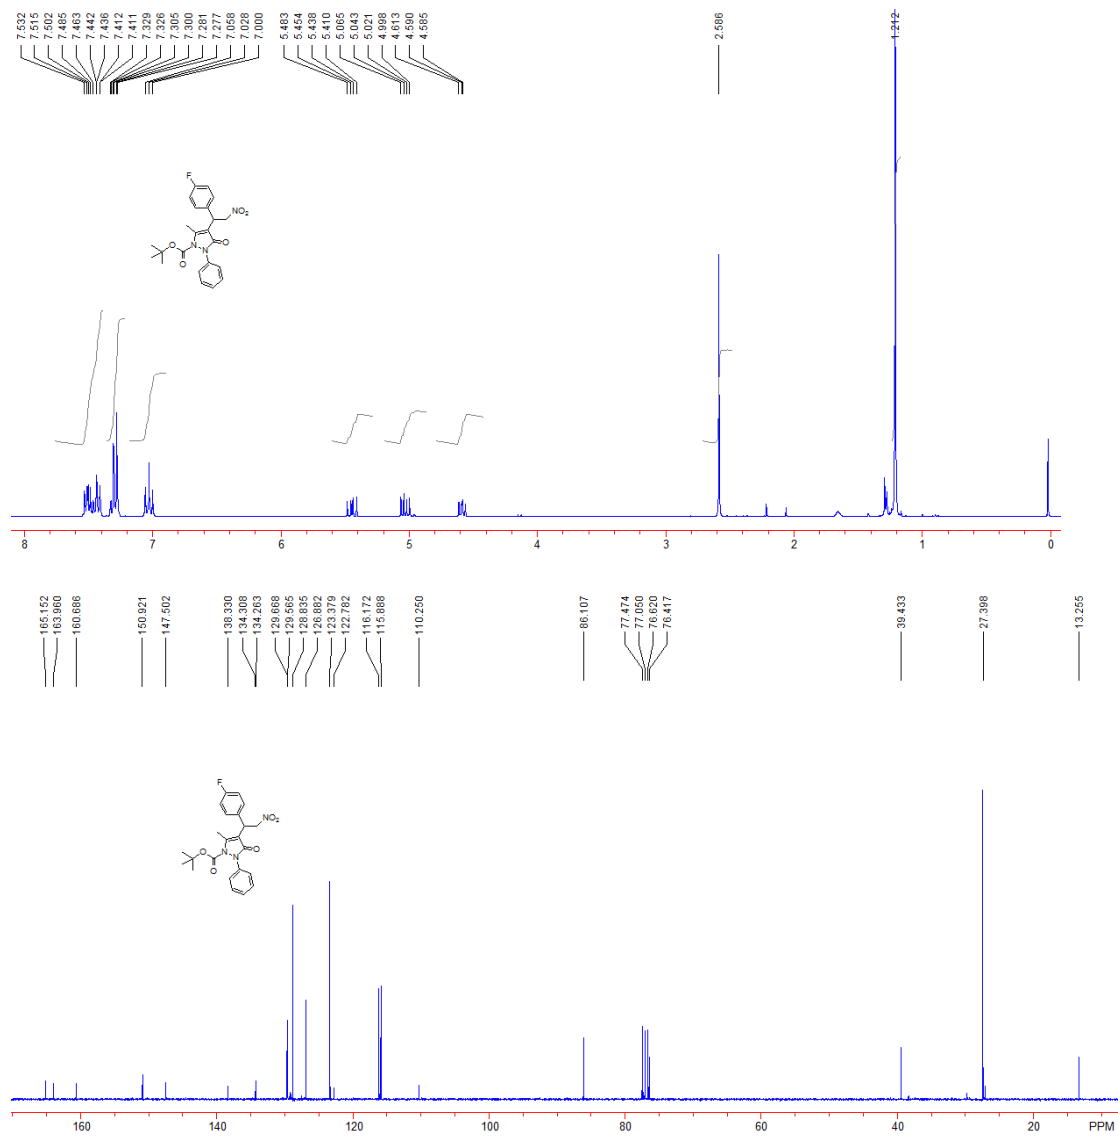

### $^1\text{H}$ and $^{13}\text{C}$ of **6c**

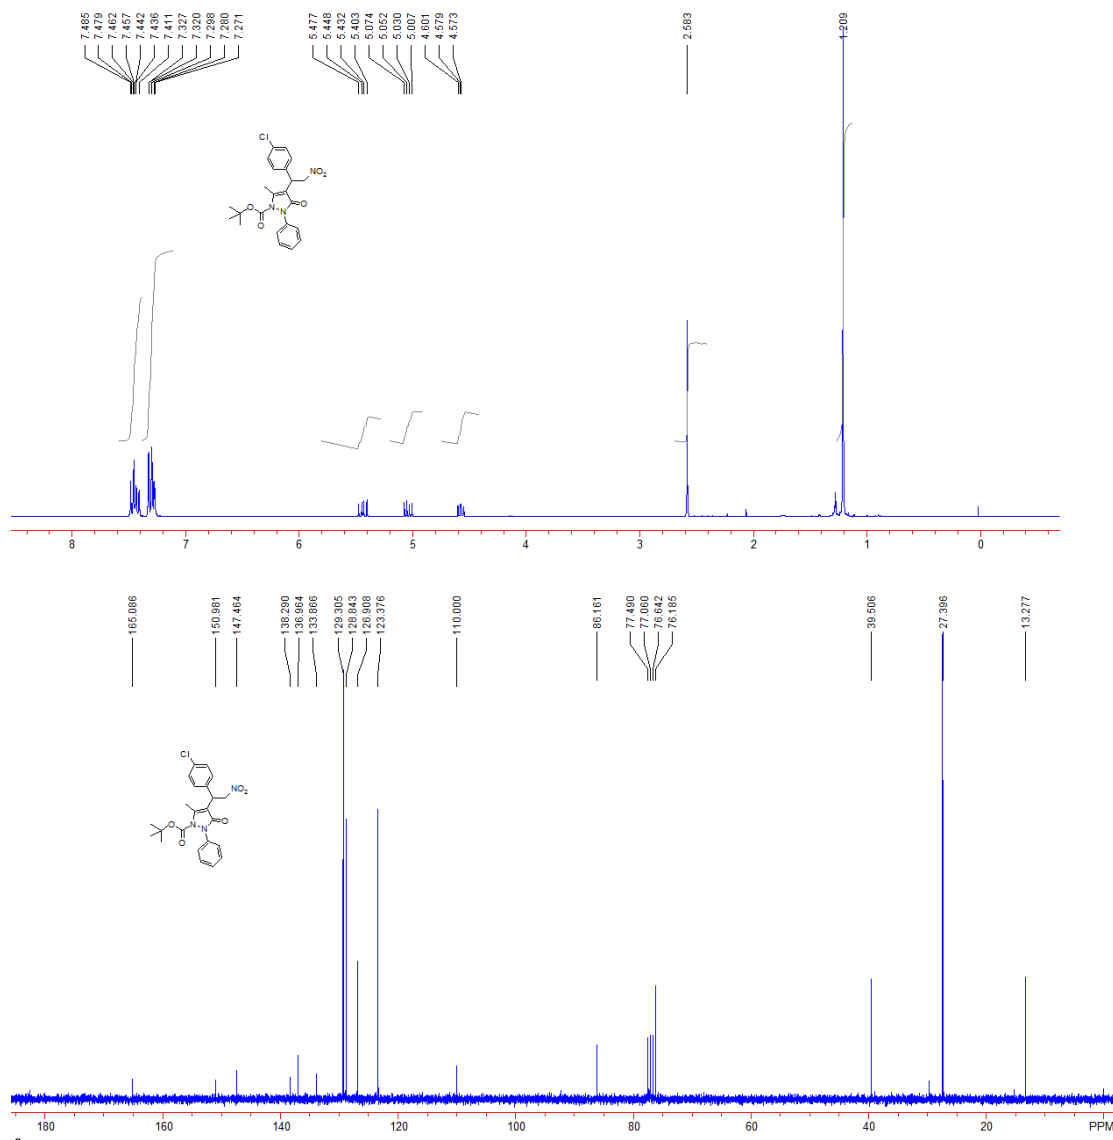



### $^1\text{H}$ and $^{13}\text{C}$ of 6d

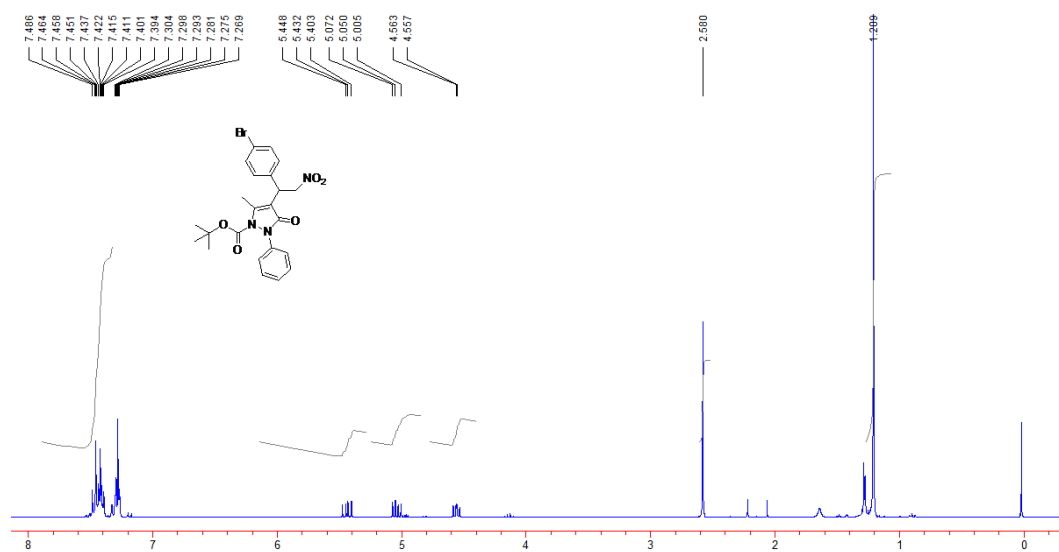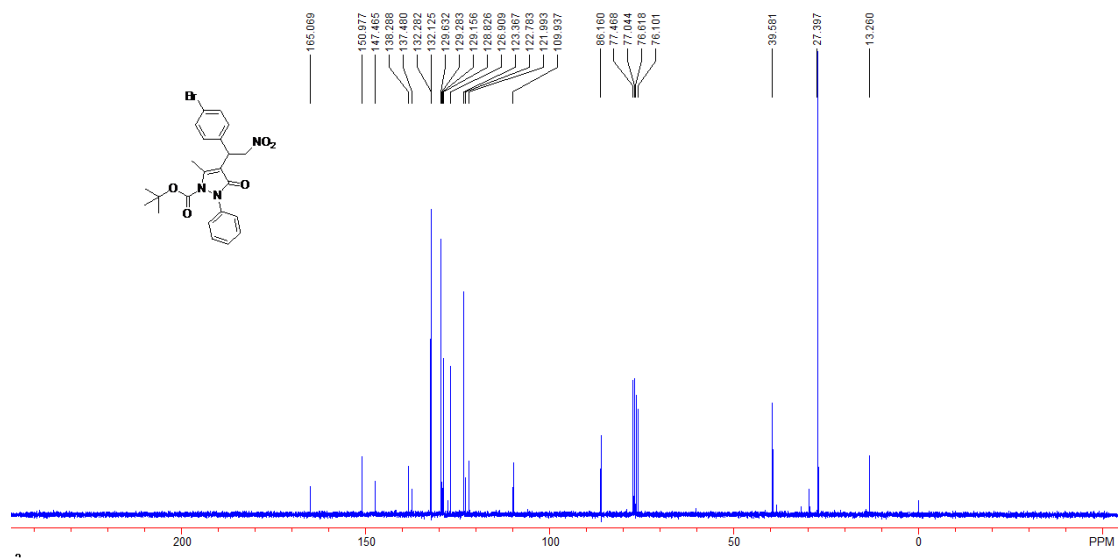

### $^1\text{H}$ and $^{13}\text{C}$ of 6e

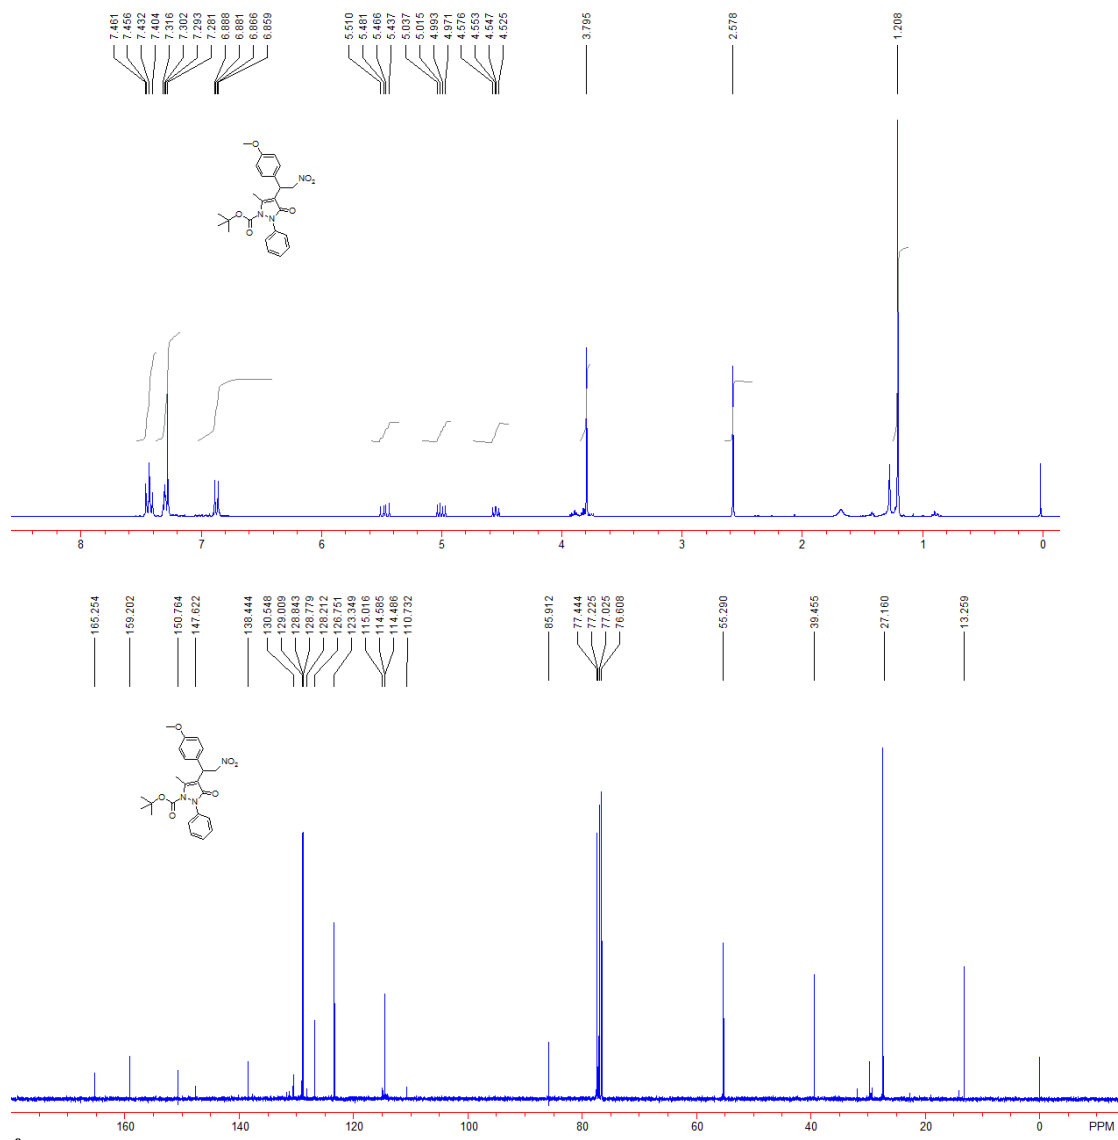

### $^1\text{H}$ and $^{13}\text{C}$ of 6f

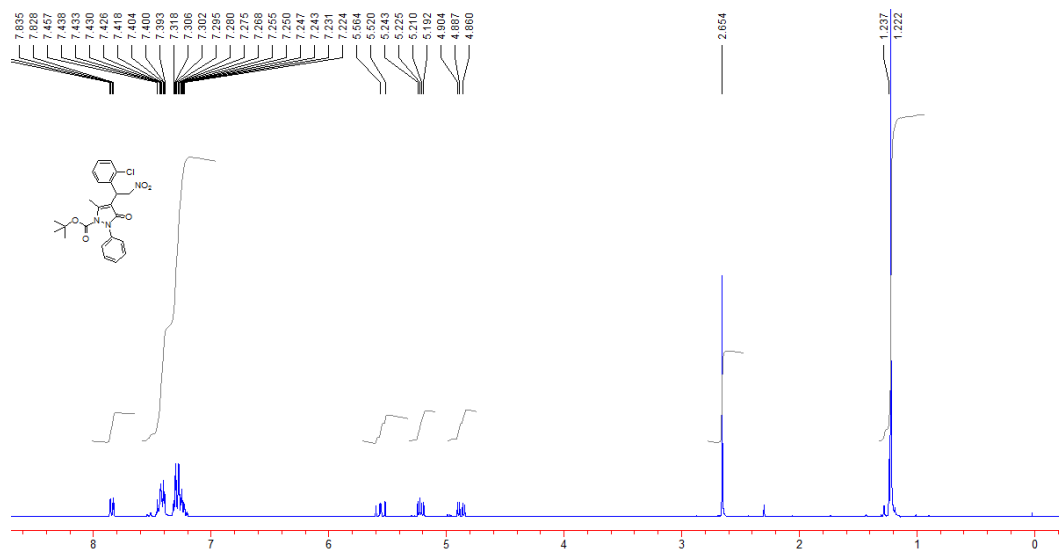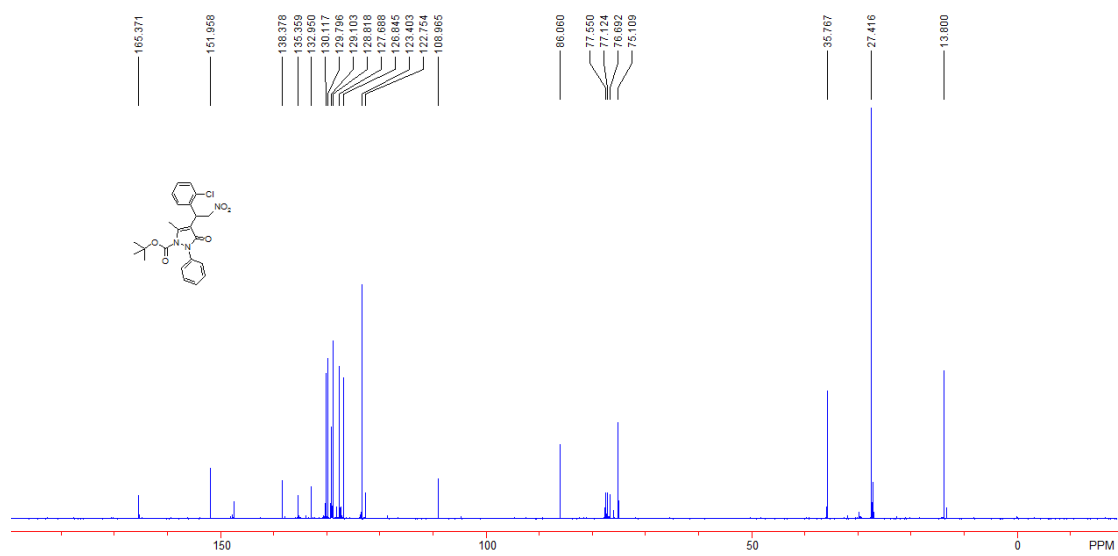

### $^1\text{H}$ and $^{13}\text{C}$ of 6g

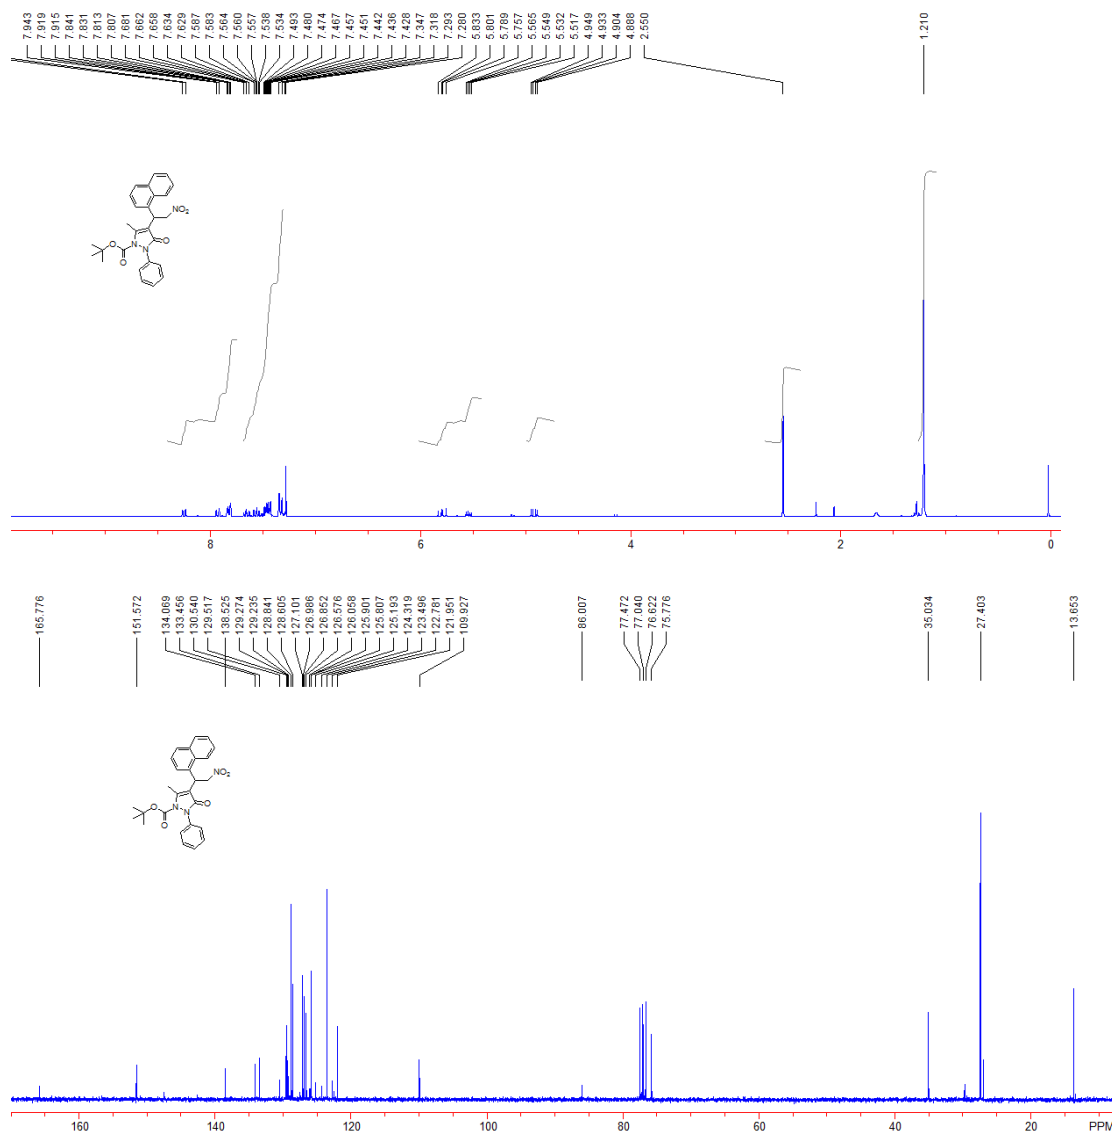

### $^1\text{H}$ and $^{13}\text{C}$ of 6h

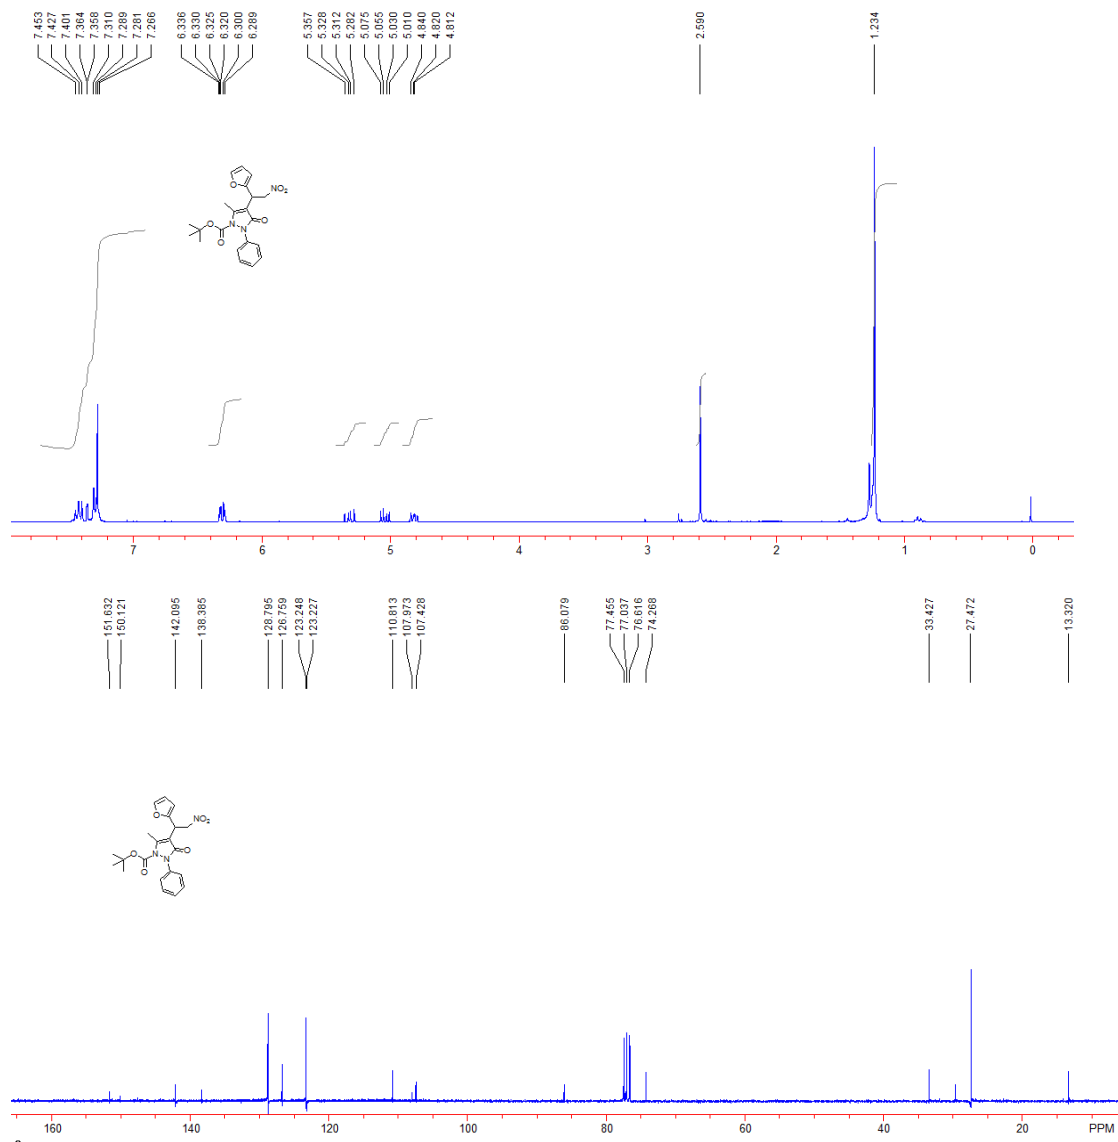

### $^1\text{H}$ and $^{13}\text{C}$ of 6i

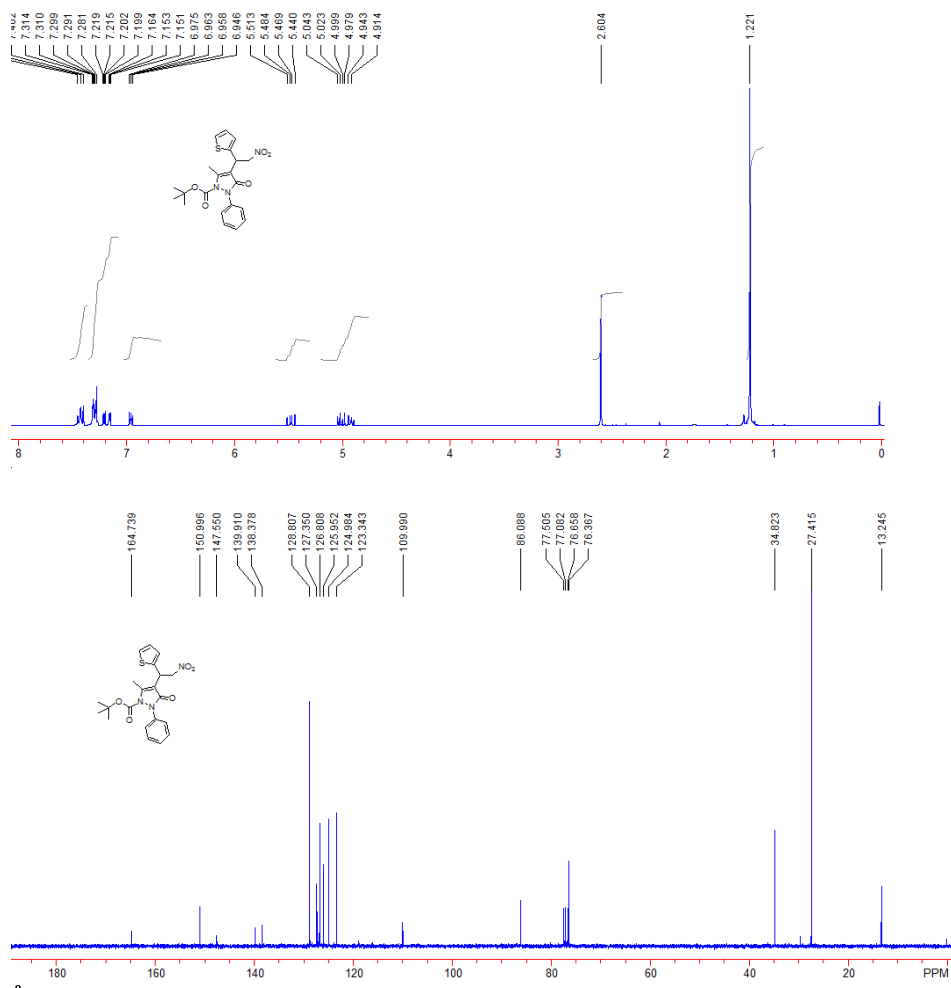

### $^1\text{H}$ and $^{13}\text{C}$ of 6j

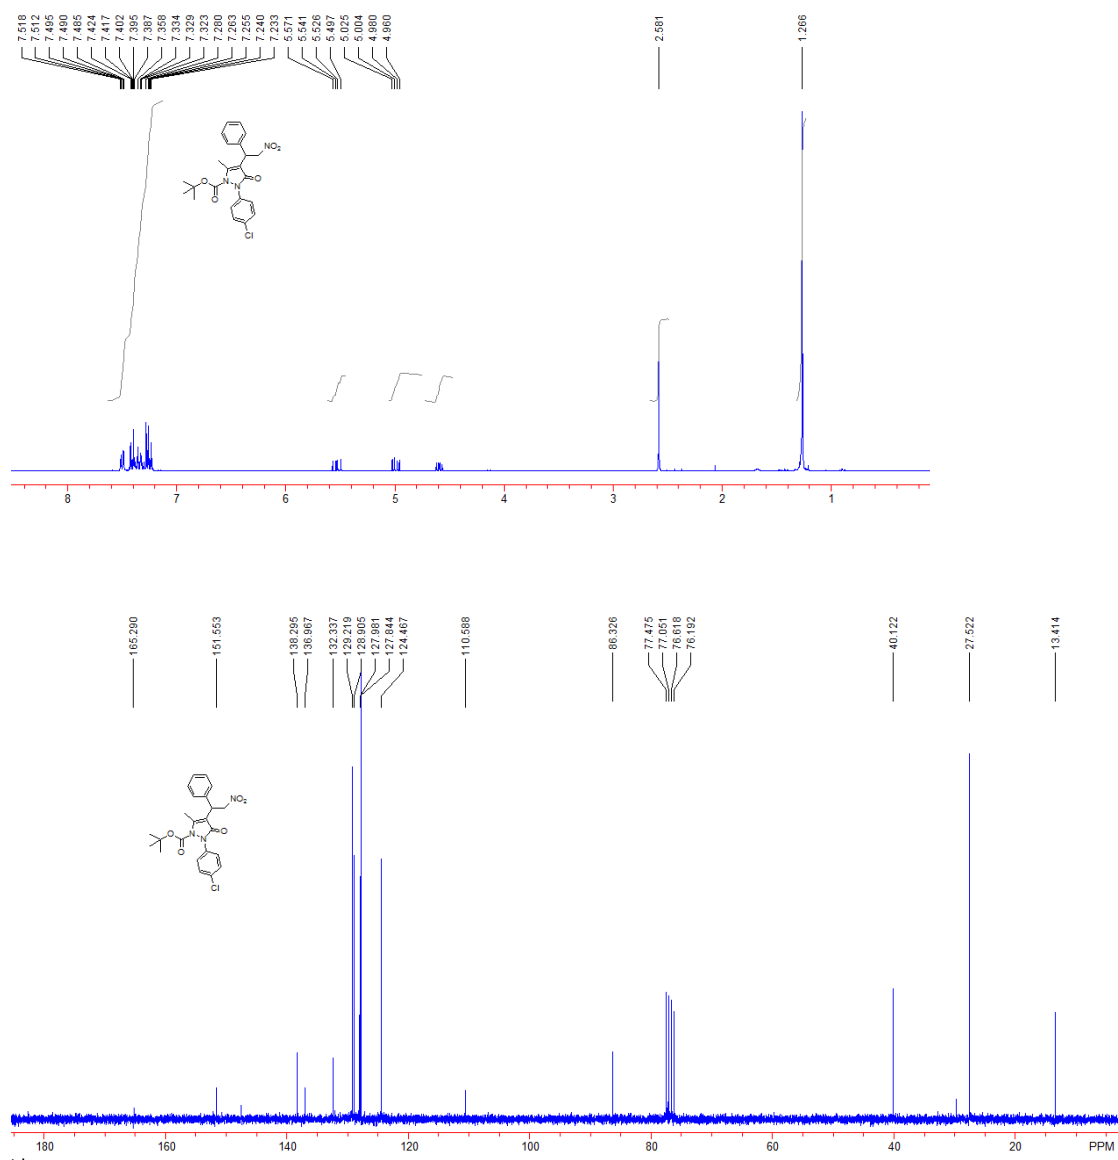

### $^1\text{H}$ and $^{13}\text{C}$ of 6k

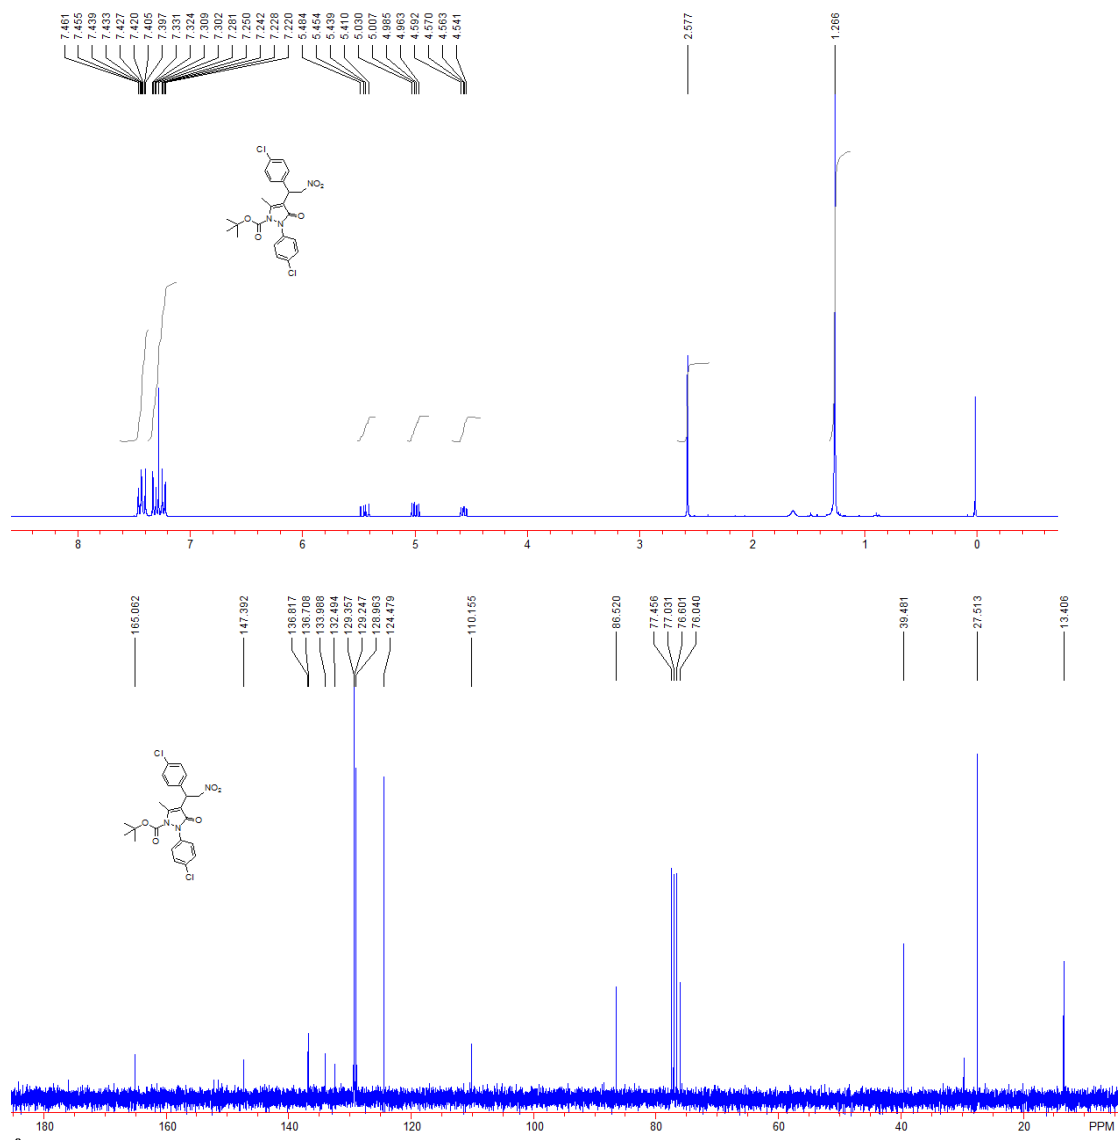



### $^1\text{H}$ and $^{13}\text{C}$ of 6l

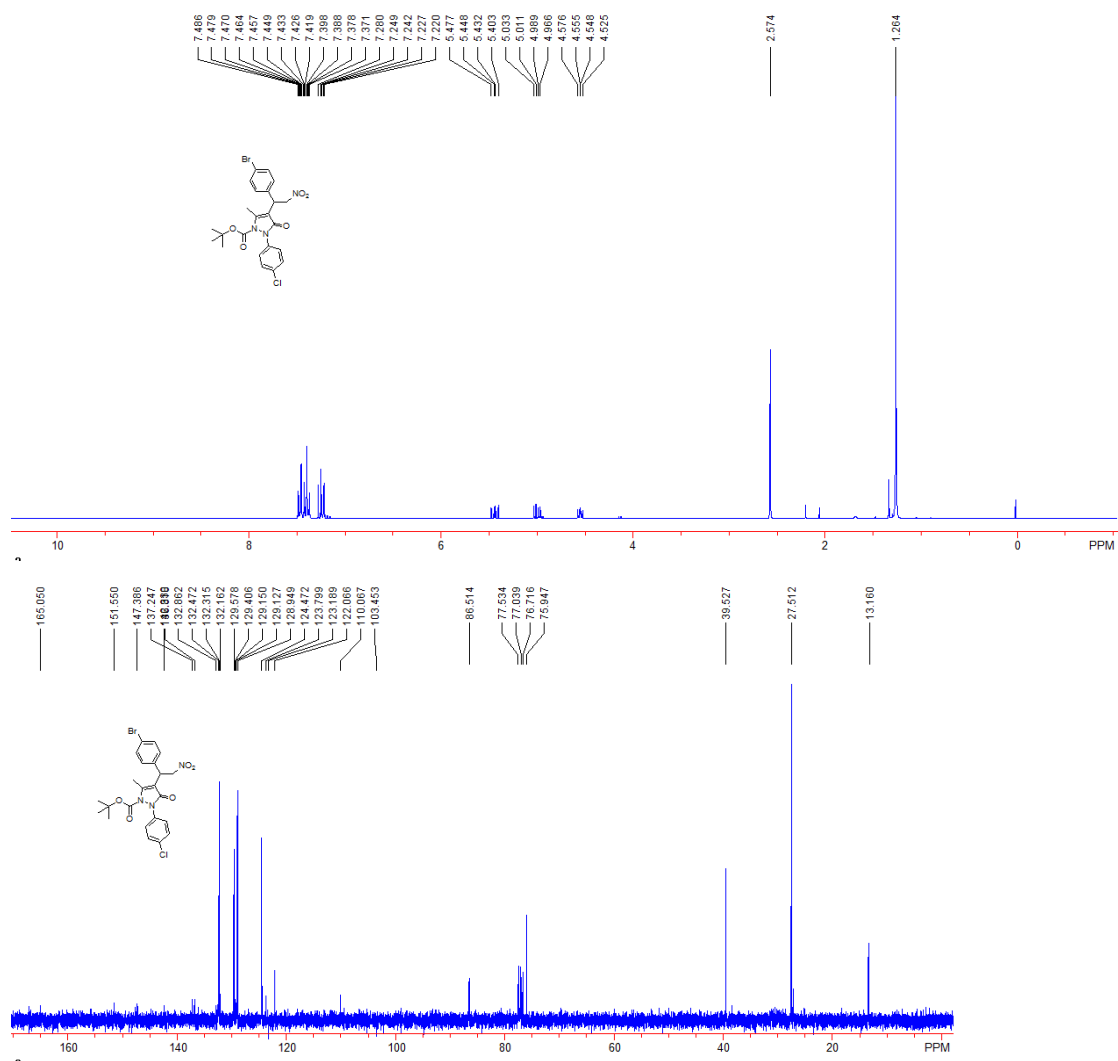

### $^1\text{H}$ and $^{13}\text{C}$ of 6m

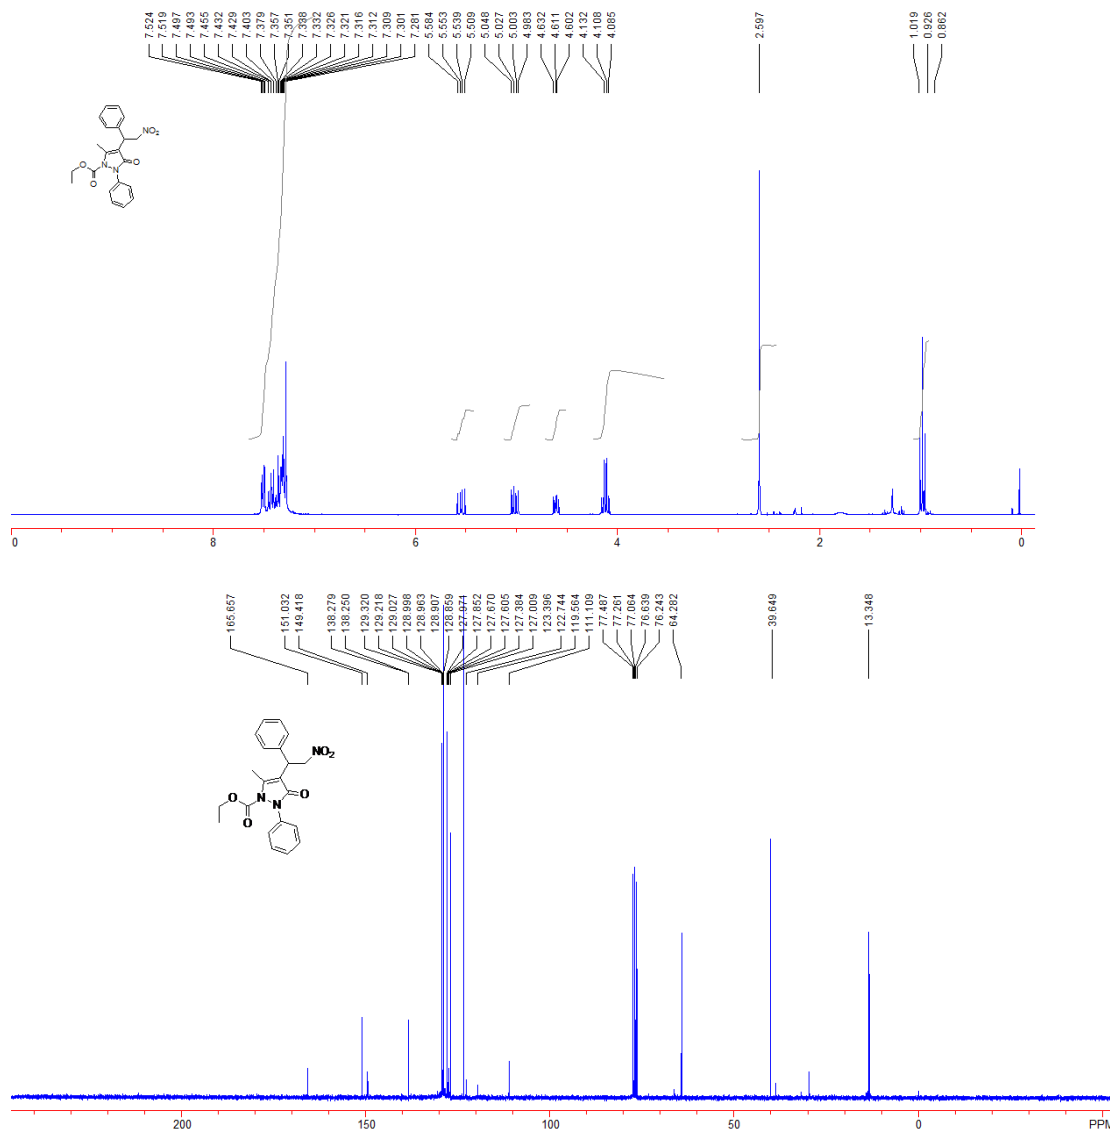

### $^1\text{H}$ and $^{13}\text{C}$ of 7a

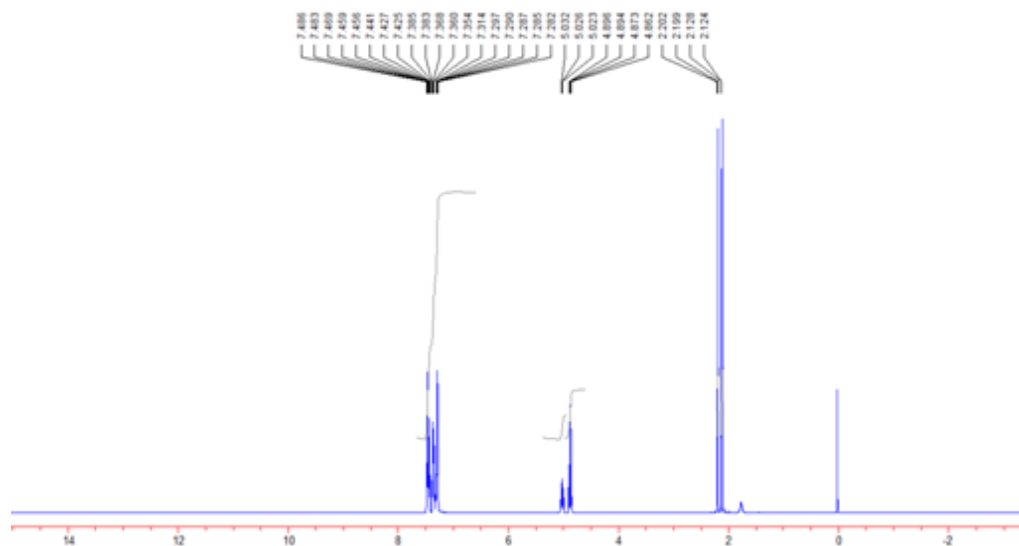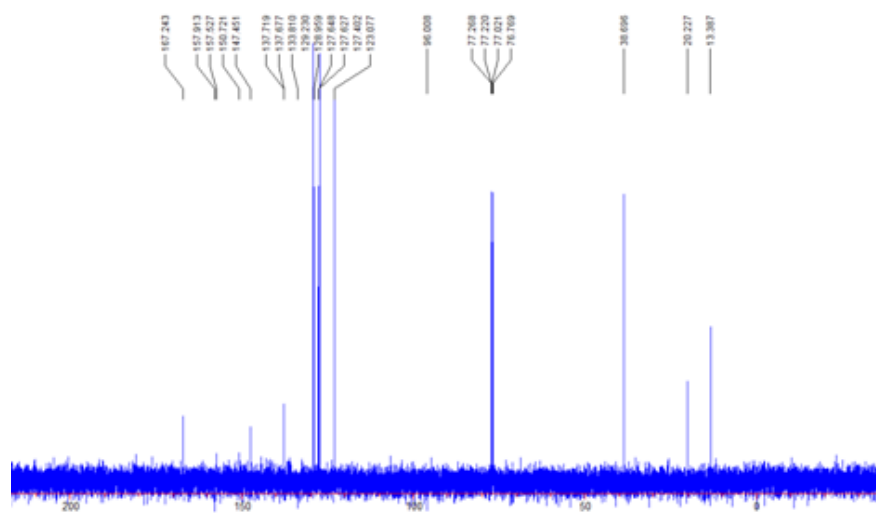

### $^1\text{H}$ and $^{13}\text{C}$ of 7b

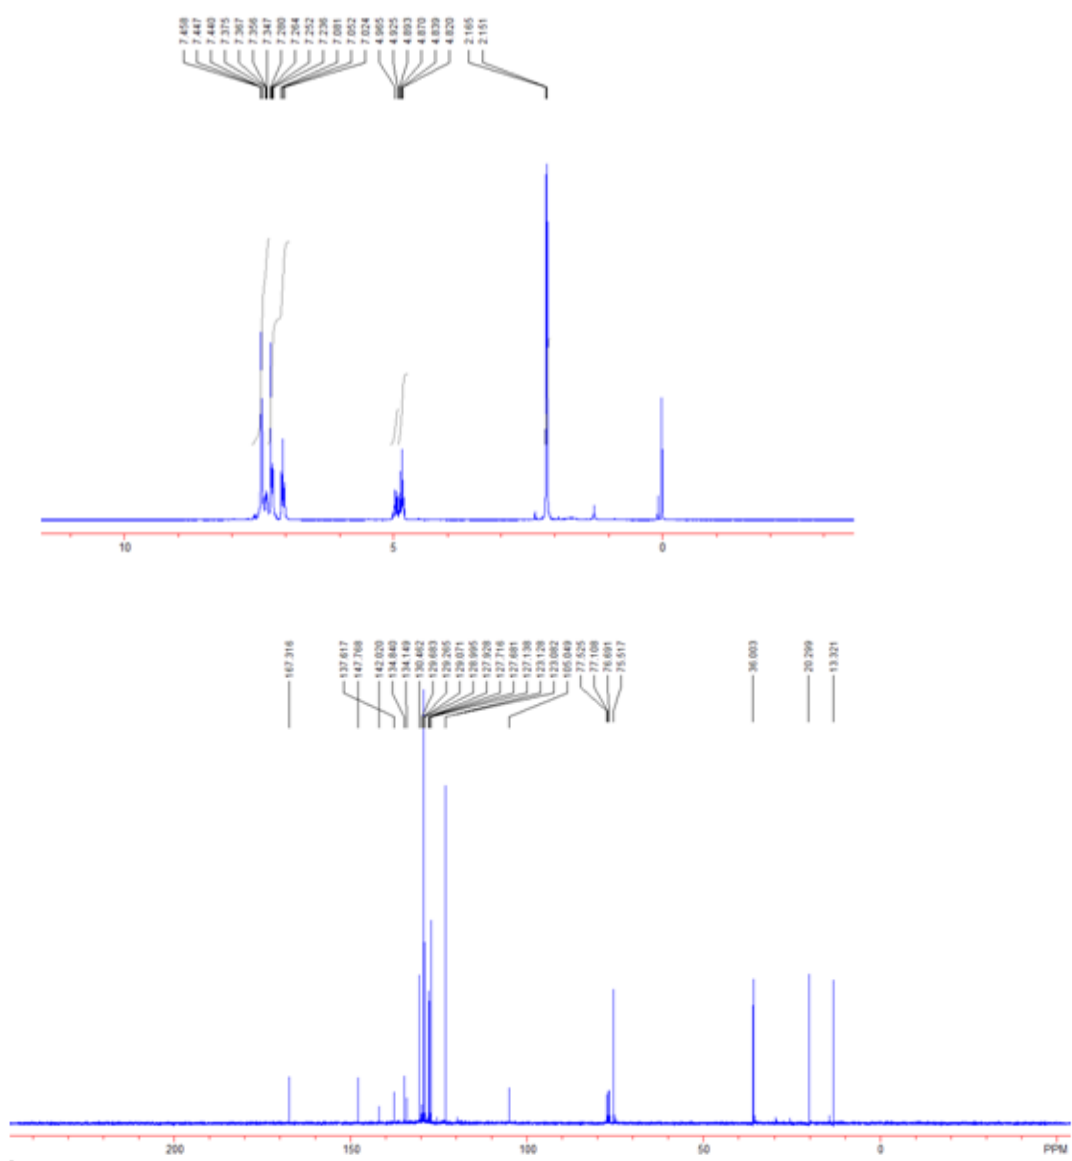

### $^1\text{H}$ and $^{13}\text{C}$ of 7c

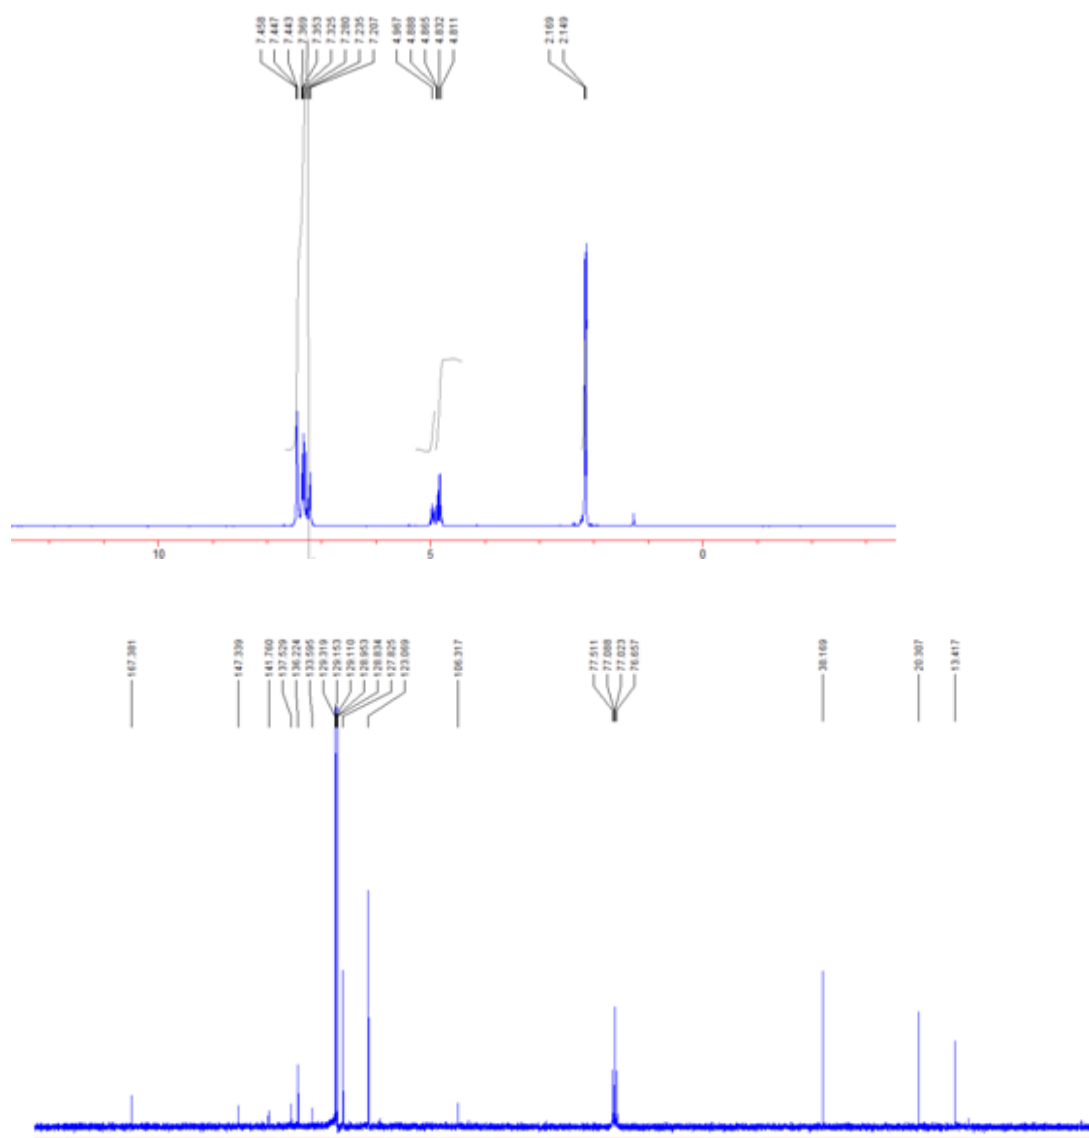

### $^1\text{H}$ and $^{13}\text{C}$ of 7d

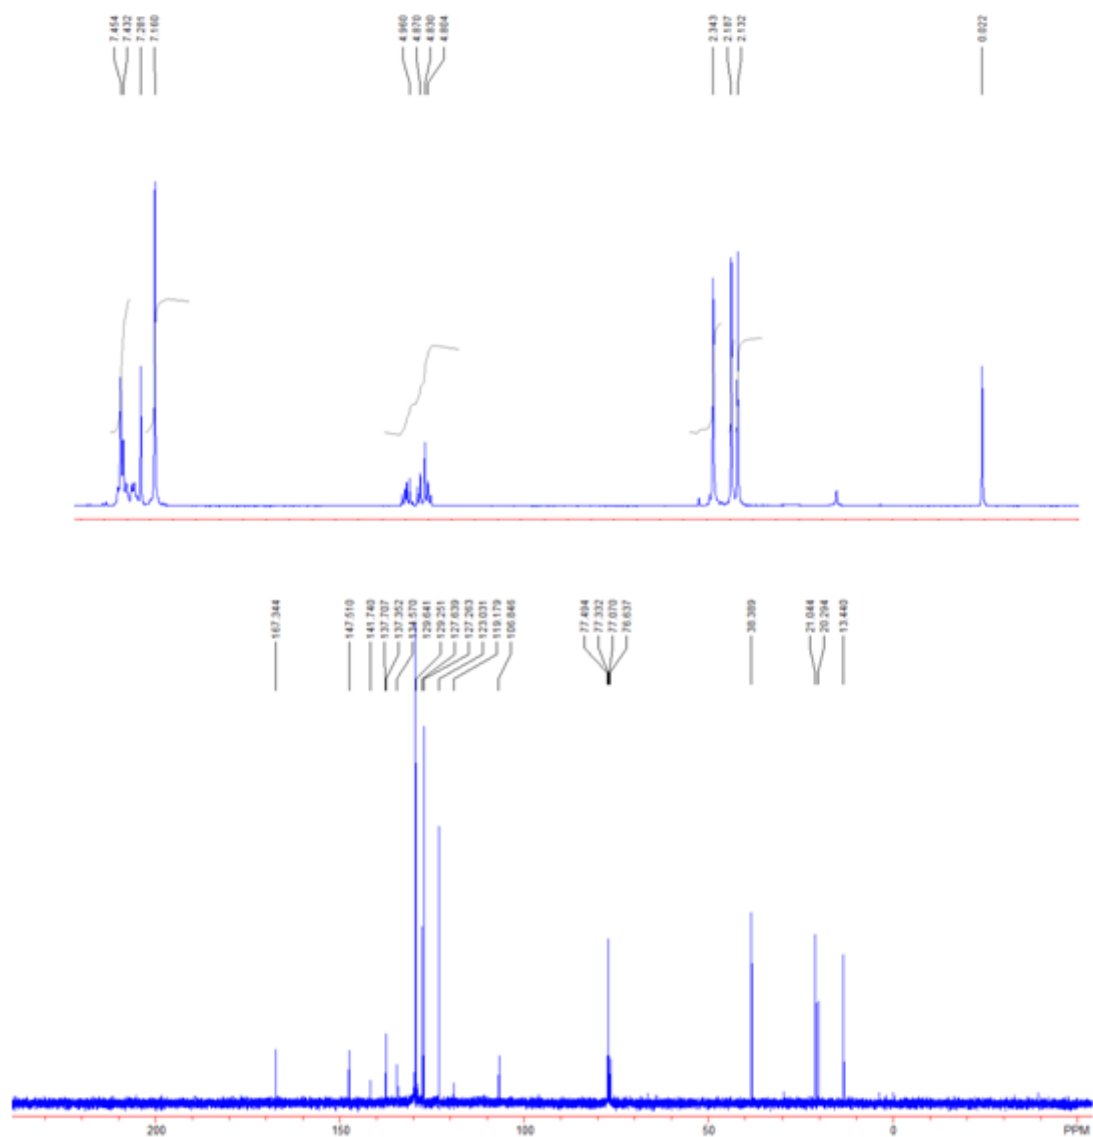

### $^1\text{H}$ and $^{13}\text{C}$ of 7e

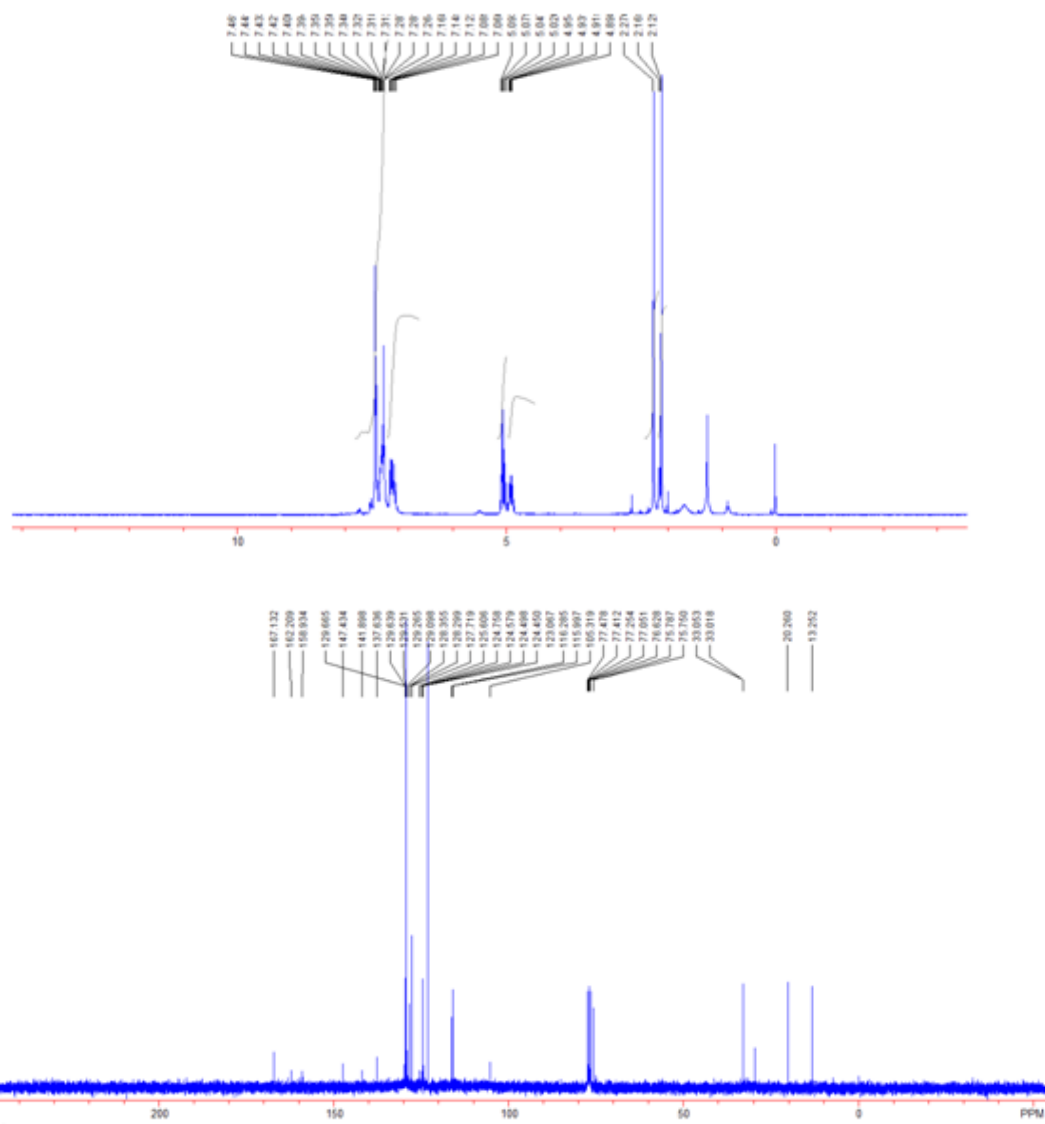

### $^1\text{H}$ and $^{13}\text{C}$ of 7f

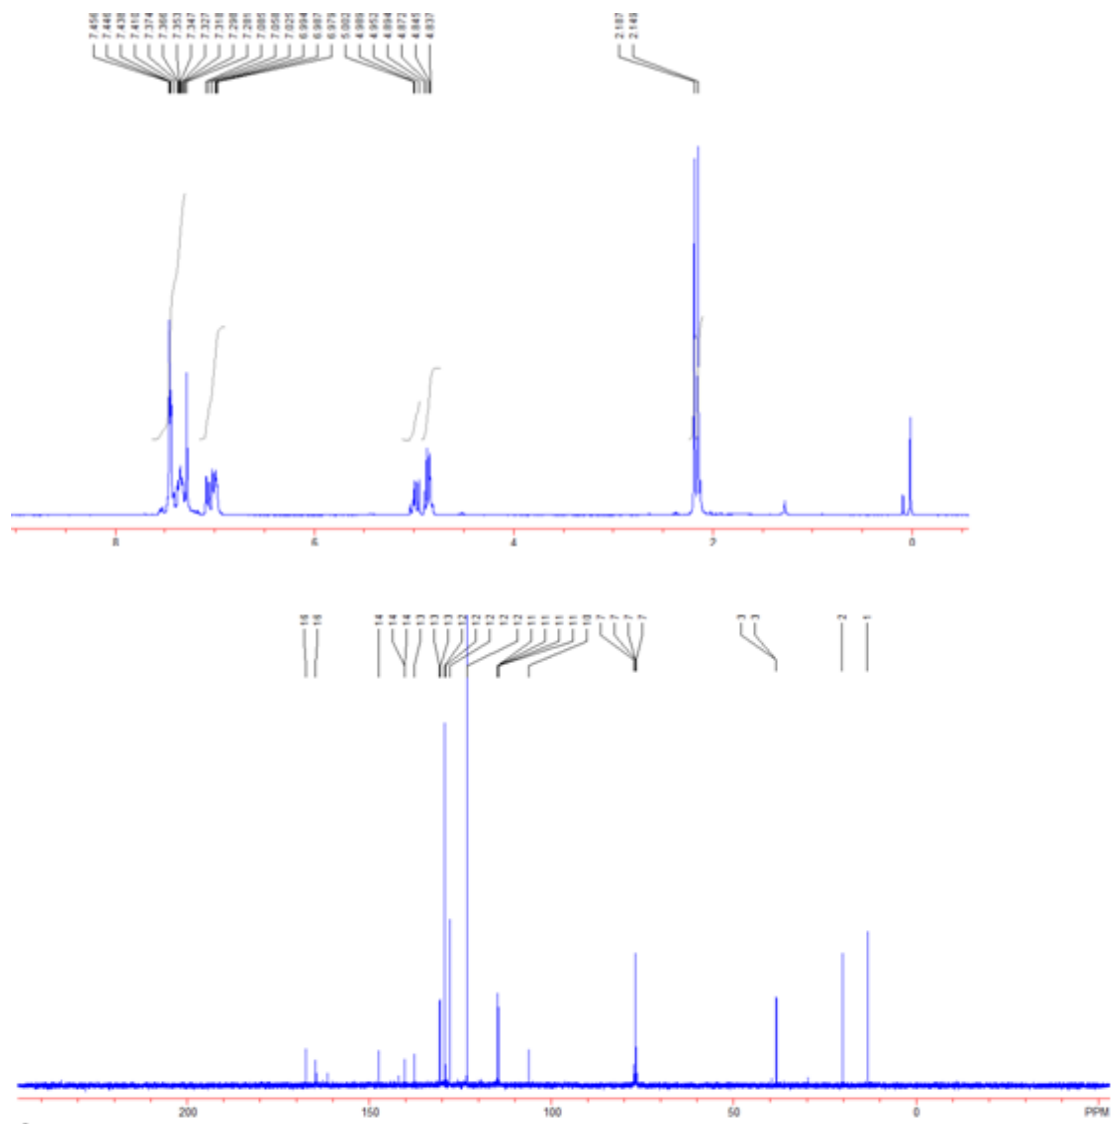



### $^1\text{H}$ and $^{13}\text{C}$ of 7g

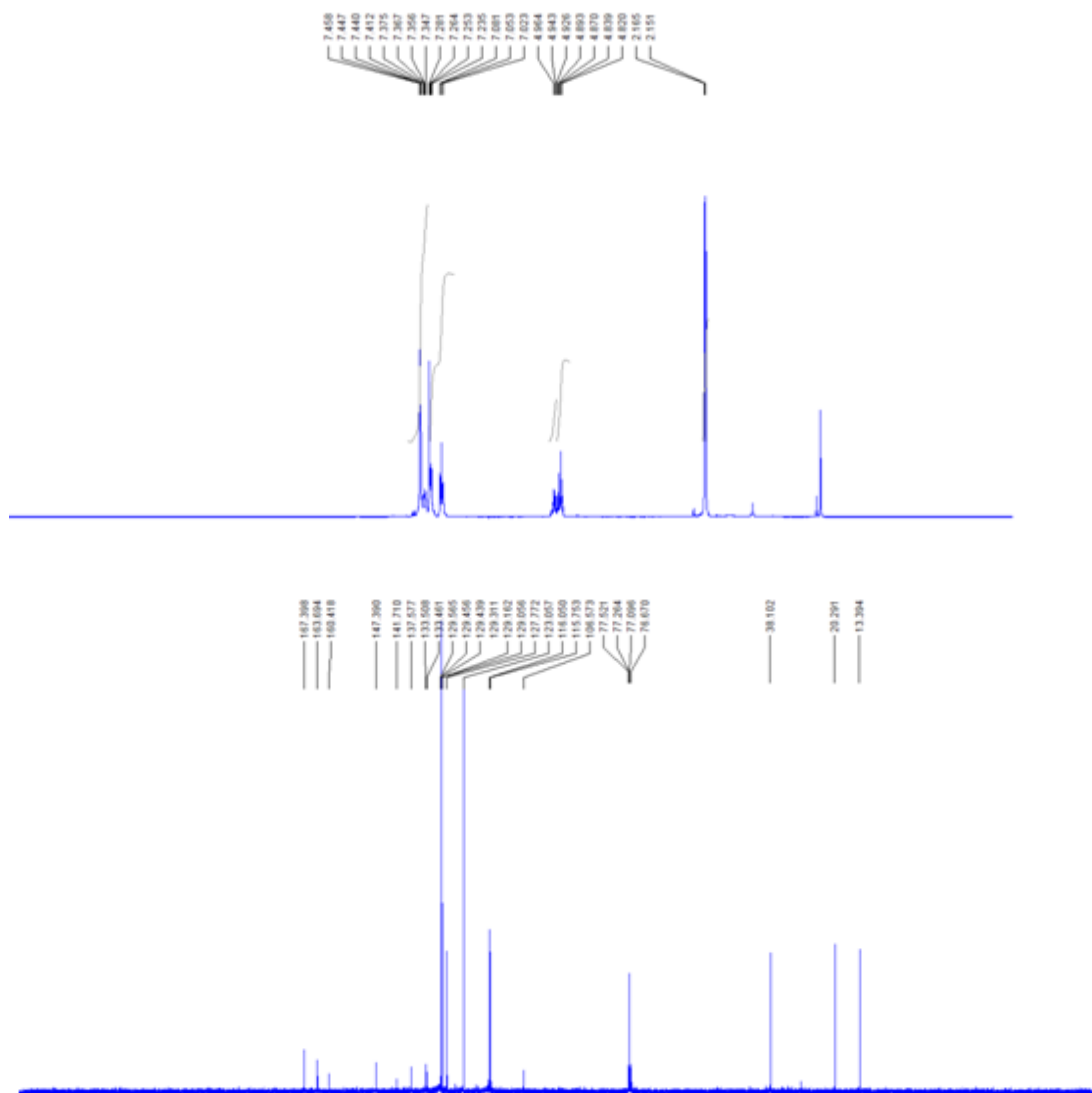

### $^1\text{H}$ and $^{13}\text{C}$ of 7h

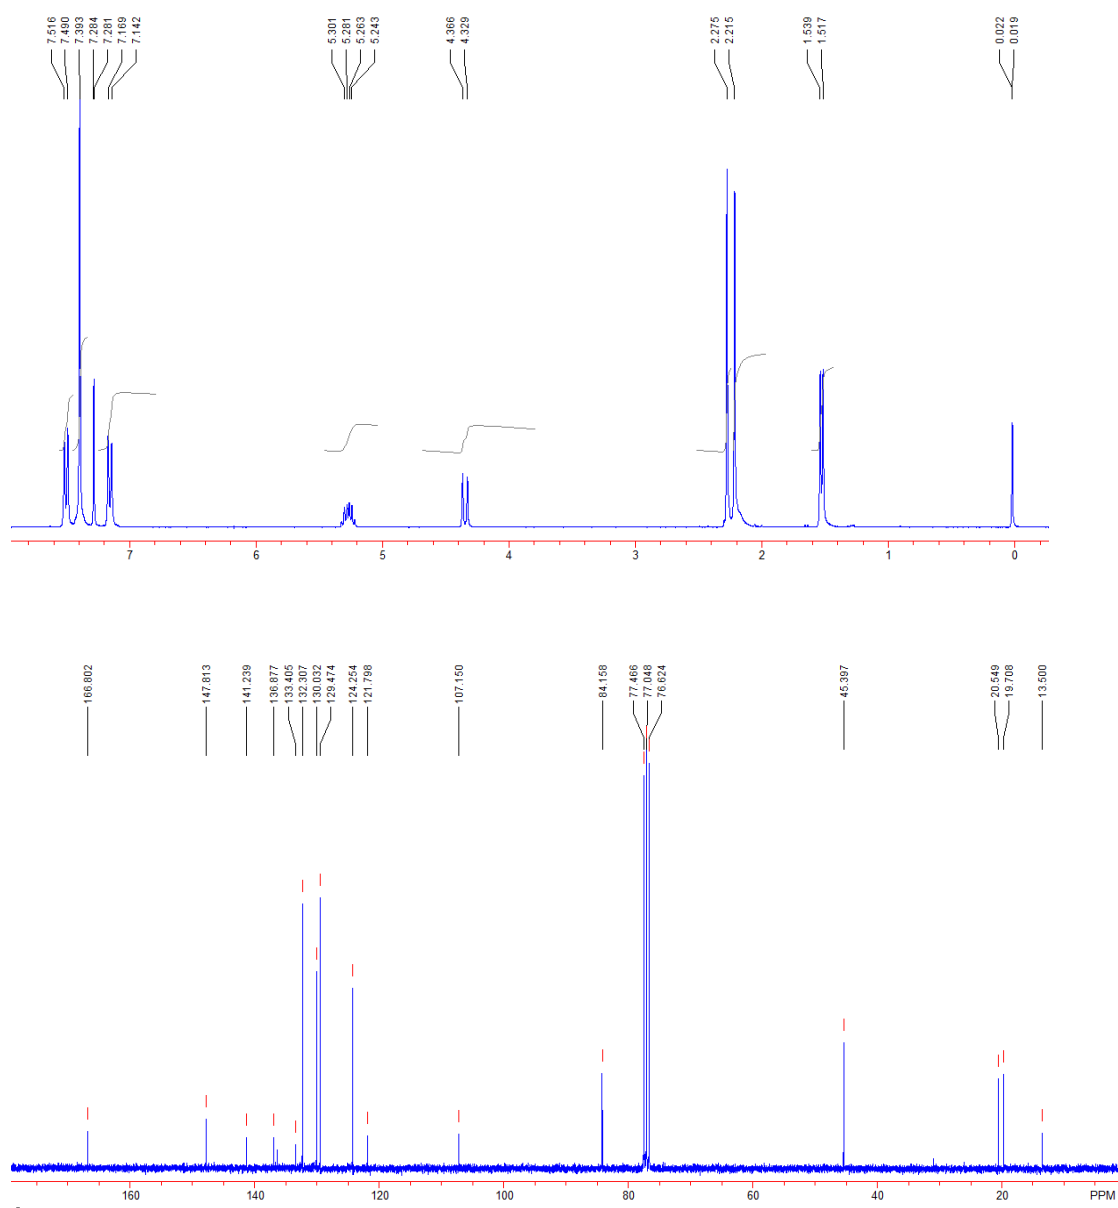

Supplement: c2ra21549g.pdf [file c2ra21549g.pdf]
